# Supplementary material for: Extractives from Artemisia afra with Anti-Bacterial and Anti-Fungal Properties
Source: MDPI journal article supplement (doi:10.3390/plants12193369), 2023-09-25
Supplement: s1 [file s1]

Article

# Extractives from *Artemisia afra* with anti-bacterial and anti-fungal properties

Tumelo L. Molokoane <sup>1</sup>, Douglas Kemboi <sup>1,2,\*</sup>, Xavier Siwe-Noundou <sup>3</sup>, Ibukun M. Famuyide <sup>4</sup>,  
Lyndy J. McGaw <sup>4</sup> and Vuyelwa J. Tembu <sup>1,\*</sup>

<sup>1</sup> Department of Chemistry, Tshwane University of Technology, Private Bag X680, Pretoria 0001, South Africa; tumelolinahmolokoane@gmail.com

<sup>2</sup> Department of Chemistry, University of Kabianga, Kericho 2030, Kenya

<sup>3</sup> Department of Pharmaceutical Sciences, Sefako Makgatho Health Sciences University, Pretoria 0204, South Africa; xavier.siwenoundou@smu.ac.za

<sup>4</sup> Phytomedicine Programme, Department of Paraclinical Sciences, University of Pretoria, Private Bag X04, Onderstepoort 0110, South Africa; adeyerimi@gmail.com (I.M.F.); lyndy.mcgaw@up.ac.za (L.J.M.)

\* Correspondence: kemboidouglas01@gmail.com (D.K.); tembuyj@tut.ac.za (V.J.T.)

---

## Supplementary data

**Table 1:**  $^1\text{H}$  ( $\delta_{\text{H}}$ ; J, Hz) NMR (400 MHz) data for compounds A-H in  $\text{CDCl}_3$ , MeOD and DMSO

|   | Compound A                    | Compound B                    | Compound C                | Compound D                | Compound E               | Compound F               | Compound G                          | Compound H             |
|---|-------------------------------|-------------------------------|---------------------------|---------------------------|--------------------------|--------------------------|-------------------------------------|------------------------|
| 1 | 0.92-1.63 (2H, m)             | 1.92-1.97 (2H, m)             | -                         | -                         | -                        | 0.94-1.76 (2H, m)        | -                                   | -                      |
| 2 | 1.61 (2H, m)                  | 1.64 (2H, m)                  | 6.34 (1H, d, J = 15.9 Hz) | 6.34 (1H, d, J = 15.9 Hz) | -                        | 1.21-1.62 (2H, m)        | 2.16-2.36 (2H, m)                   | -                      |
| 3 | 3.20 (1H, dd, J=11.1, 4.8 Hz) | 4.47 (1H, dd, J=10.2, 5.6 Hz) | 7.63 (1H, d, J = 15.9 Hz) | 7.60 (1H, d, J = 15.9 Hz) | 6.28 (1H, d, J = 9.5 Hz) | 3.09 (1H, m)             | 5.41 (1H, m)                        | 6.39 (1H, d, J 9.5 Hz) |
| 4 | -                             | -                             | -                         | -                         | 7.60 (1H, d, J = 9.5 Hz) | 2.11-2.33 (2H, m)        | 4.00 (1H, dd, J =3.0, 7.1 Hz)       | 7.93 (1H, d, J 9.5 Hz) |
| 5 | 0.78 (1H, m)                  | 0.92 (1H, m)                  | 7.43 (2H, d, J = 8.4 Hz)  | 6.88 (1H, d, J = 8.2 Hz)  | 6.87 (1H, s)             | -                        | 5.46 (1H, ddd, J= 3.0, 7.1, 7.1 Hz) | 7.11 (1H, s)           |
| 6 | 1.52 -1.67 (2H, m)            | 1.61-1.66 (2H, m)             | 6.87 (2H, d, J = 8.4 Hz)  | -                         | -                        | 5.31 (1H, d, J = 4.8 Hz) | 2.03-2.25 (2H, m)                   | -                      |
| 7 | 1.36 - 2.03 (2H, m)           | 1.25-1.36 (2H, m)             | -                         | -                         | -                        | 1.40-1.88 (2H, m)        | -                                   | -                      |
| 8 | -                             | -                             | 6.87                      | 7.16 (1H, s)              | 6.94 (1H, s)             | 1.37 (1H m)              | -                                   | -                      |

|    |                                             |                                |      |              |   |                   |   |   |
|----|---------------------------------------------|--------------------------------|------|--------------|---|-------------------|---|---|
| 9  | 1.44 (1H, m)                                | 1.47 (1H, m)                   | 7.43 | 7.04 (1H, s) | - | 0.88 (1H, m)      | - | - |
| 10 | -                                           | -                              | -    | -            | - | -                 | - | - |
| 11 | 1.45-1.70 (2H, m)                           | 1.47-1.67 (2H, m)              | -    | -            | - | 1.48 (2H, m)      | - | - |
| 12 | 1.56-1.64 (2H, m)                           | 1.30-1.34 (2H, m)              | -    | -            | - | 1.92-2.49 (2H, m) | - | - |
| 13 | -                                           | -                              | -    | -            | - | -                 | - | - |
| 14 | -                                           | -                              | -    | -            | - | 1.06 (1H, m)      | - | - |
| 15 | 5.55 (1H, dd, $J=8.2, 3.2$ Hz)              | 5.55 (1H, dd, $J=8.0, 3.8$ Hz) | -    | -            | - | 0.99-1.51 (2H, m) | - | - |
| 16 | 1.66-1.97 (1H, m: 1H, dd, $J=14.7, 3.2$ Hz) | 1.64-1.67 (2H, m)              | -    | -            | - | 1.23-1.79 (2H, m) | - | - |
| 17 | -                                           | -                              | -    | -            | - | 1.08 (1H, m)      | - | - |
| 18 | 0.95 (1H, m)                                | 0.93 (1H, m)                   | -    | -            | - | 0.63 (3H, s)      | - | - |
| 19 | 0.97-1.30 (2H, m)                           | 1.38-1.42 (2H, m)              | -    | -            | - | 0.94 (3H, s)      | - | - |
| 20 | -                                           | -                              | -    | -            | - | 1.21 (1H, m)      | - | - |

|    |                   |                   |                          |   |   |                   |              |                        |
|----|-------------------|-------------------|--------------------------|---|---|-------------------|--------------|------------------------|
| 21 | 1.25-1.31 (2H, m) | 1.02-1.42 (2H, m) | -                        | - | - | 0.88 (3H, s)      | -            | -                      |
| 22 | 1.02-1.34 (2H, m) | 1.06-1.10 (2H, m) | -                        | - | - | 1.23-1.45 (2H, m) | -            | -                      |
| 23 | 1.00 (3H, s)      | 0.88 (3H, s)      | -                        | - | - | 1.12-1.14 (2H, m) | -            | -                      |
| 24 | 0.83 (3H, s)      | 0.97 (3H, s)      | -                        | - | - | 0.89 (1H, m)      | -            | -                      |
| 25 | 0.95 (3H, s)      | 0.97 (3H, s)      | -                        | - | - | 1.60 (1H, m)      | -            | -                      |
| 26 | 1.11 (3H, s)      | 1.11 (3H, s)      | -                        | - | - | 0.79 (3H, s)      | -            | -                      |
| 27 | 0.94 (3H, s)      | 0.92 (3H, s)      | -                        | - | - | 0.97 (3H, s)      | -            | -                      |
| 28 | 0.85 (3H, s)      | 0.85 (3H, s)      | -                        | - | - | 1.19 (2H, m)      | -            | -                      |
| 29 | 0.97 (3H, s)      | 0.97 (3H, s)      | -                        | - | - | 0.80 (3H, s)      | -            | -                      |
| 30 | 0.92 (3H, s)      | 0.92 (3H, s)      | -                        | - | - | -                 | -            | -                      |
| 31 | -                 | 2.06 (3H, s)      | -                        | - | - | -                 | -            | -                      |
| 1' | -                 | -                 | 4.22 (2H, t, J = 6.7 Hz) | - | - | 4.20 (1H, m)      | -            | 5.14 (1H, d, J 7.3 Hz) |
| 2' | -                 | -                 | 1.72 (2H, m)             | - | - | 2.88 (1H, m)      | 7.09 (1H, s) | 3.24 (1H, m)           |

|     |   |   |                                  |   |   |              |                             |                                          |
|-----|---|---|----------------------------------|---|---|--------------|-----------------------------|------------------------------------------|
| 3'  | - | - | 1.41 (2H, dd, $J = 9.7, 5.8$ Hz) | - | - | 3.09 (1H, m) |                             | 3.10 (1H, m)                             |
| 4'  | - | - | 1.28 (1H, s)                     | - | - | 3.02 (1H, m) |                             | 3.09 (1H, m)                             |
| 5'  | - | - | 1.28 (1H, s)                     | - | - | 3.04 (1H, m) | 6.81 (1H, d, $J = 8.2$ Hz)  | 3.23 (1H, m)                             |
| 6'  | - | - | 1.28 (1H, s)                     | - | - | 3.64 (1H, m) | 6.97 (1H, d, $J = 8.2$ Hz)  | 3.38 (1H, m) 3.59 (d, $J = 11.7$ Hz, 1H) |
| 7'  | - | - | 1.28 (1H, s)                     | - | - | -            | 7.65 (1H, d, $J = 15.9$ Hz) | -                                        |
| 8'  | - | - | 1.28 (1H, s)                     | - | - | -            | 6.31 (1H, d, $J = 15.9$ Hz) | -                                        |
| 9'  | - | - | 1.28 (1H, s)                     | - | - | -            | -                           | -                                        |
| 10' | - | - | 1.28 (1H, s)                     | - | - | -            | -                           | -                                        |
| 11' | - | - | 1.28 (1H, s)                     | - | - | -            | -                           | -                                        |
| 12' | - | - | 0.91 (3H, t, $J = 6.5$ Hz)       | - | - | -            | -                           | -                                        |
| 1'' | - | - | -                                | - | - | -            | -                           | -                                        |
| 2'' | - | - | -                                | - | - | -            | 7.08 (1H, s)                | -                                        |

|                  |   |   |   |              |              |   |                             |              |
|------------------|---|---|---|--------------|--------------|---|-----------------------------|--------------|
| 3''              | - | - | - | -            | -            | - | -                           | -            |
| 4''              | - | - | - | -            | -            | - | -                           | -            |
| 5''              | - | - | - | -            | -            | - | 6.81 (1H, d, $J = 8.2$ Hz)  | -            |
| 6''              | - | - | - | -            | -            | - | 6.96 (1H, d, $J = 8.2$ Hz)  | -            |
| 7''              | - | - | - | -            | -            | - | 7.61 (1H, d, $J = 15.9$ Hz) | -            |
| 8''              | - | - | - | -            | -            | - | 6.26 (1H, d, $J = 15.9$ Hz) | -            |
| 9''              | - | - | - | -            | -            | - | -                           | -            |
| OCH <sub>3</sub> | - | - | - | 3.95 (3H, s) | 3.98 (3H, s) | - | 3.87 (3H, s)                | 3.81 (3H, s) |
| OCH <sub>3</sub> | - | - | - | -            | -            | - | 3.90 (3H, s)                | 3.90 (3H, s) |
| OH               | - | - | - | -            | 6.19 (1H, s) | - | -                           | -            |

Key: *s* – singlet, *d* – doublet, *dd* – doublet of doublet, *t* – triplet, *m* – multiplet, Hz – hertz, (-) - not determined

**Table 2:** <sup>13</sup>C (δc) (100.6 MHz) NMR data for compounds A-H in CDCl<sub>3</sub>, MeOD and DMSO

|  | Compound A | Compound B | Compound C | Compound D | Compound E | Compound F | Compound G | Compound H |
|--|------------|------------|------------|------------|------------|------------|------------|------------|
|--|------------|------------|------------|------------|------------|------------|------------|------------|

|    |                      |                      |          |          |          |                       |         |          |
|----|----------------------|----------------------|----------|----------|----------|-----------------------|---------|----------|
| 1  | 37.7 CH <sub>2</sub> | 37.7 CH <sub>2</sub> | 168.0    | 167.7 C  |          | 37.2 CH <sub>2</sub>  | 73.3 C  |          |
| 2  | 27.2 CH <sub>2</sub> | 23.5 CH <sub>2</sub> | 115.5 CH | 115.9 CH | 161.5 C  | 29.7 CH <sub>2</sub>  | 34.6 CH | 160.3 C  |
| 3  | 79.1 CH              | 81.00 CH             | 144.6 CH | 144.7 CH | 113.4 CH | 77.4 CH               | 70.7 CH | 115.1 CH |
| 4  | 38.8 C               | 37.9 C               | 127.0    | 128.1 C  | 143.4 CH | 38.3 CH <sub>2</sub>  | 61.1 CH | 144.8 CH |
| 5  | 55.5 CH              | 55.6 CH              | 130.0 CH | 110.5 CH | 107.4 CH | 140.9 C               | 71.2 CH | 105.9 CH |
| 6  | 18.8 CH <sub>2</sub> | 18.7 CH <sub>2</sub> | 115.9 CH | 148.5 C  | 144.0 C  | 121.7 CH              | 36.9 CH | 149.9 C  |
| 7  | 41.3 CH <sub>2</sub> | 33.1 CH <sub>2</sub> | 158.0    | 145.9 C  | 149.7 C  | 31.9 CH <sub>2</sub>  | 175.9   | 142.2 C  |
| 8  | 39.0 C               | 39.0 C               | 115.9 CH | 113.0 CH | 103.2 CH | 31.8 CH               | -       | 140.7 C  |
| 9  | 49.3 CH              | 49.2 CH              | 130.0 CH | 121.8 CH | -        | 50.1 CH               | -       | -        |
| 10 | 38.0 C               | 37.4 C               | -        | -        | -        | 36.7 C                | -       | -        |
| 11 | 17.5 CH <sub>2</sub> | 17.5 CH <sub>2</sub> | -        | -        | -        | 21.04 CH <sub>2</sub> | -       | -        |
| 12 | 33.7 CH <sub>2</sub> | 36.7 CH <sub>2</sub> | -        | -        | -        | 40.2 CH <sub>2</sub>  | -       | -        |
| 13 | 37.6 C               | 37.6 CH              | -        | -        | -        | 42.3 C                | -       | -        |
| 14 | 158.1 C              | 158.0 C              | -        | -        | -        | 56.6 CH               | -       | -        |
| 15 | 116.9 CH             | 117.0 CH             | -        | -        | -        | 24.3 CH <sub>2</sub>  | -       | -        |
| 16 | 37.7 CH <sub>2</sub> | 33.7 CH <sub>2</sub> | -        | -        | -        | 28.2 CH <sub>2</sub>  | -       | -        |
| 17 | 35.8 C               | 35.8 C               | -        | -        | -        | 55.9 CH               | -       | -        |
| 18 | 48.8 CH              | 48.8 CH              | -        | -        | -        | 12.2 CH <sub>3</sub>  | -       | -        |
| 19 | 36.7 CH <sub>2</sub> | 41.2 CH <sub>2</sub> | -        | -        | -        | 19.4 CH <sub>3</sub>  | -       | -        |
| 20 | 28.8 C               | 28.8 C               | -        | -        | -        | 35.9 CH               | -       | -        |
| 21 | 33.1 CH <sub>2</sub> | 35.1 CH <sub>2</sub> | -        | -        | -        | 19.1 CH <sub>3</sub>  | -       | -        |

|     |                      |                       |                       |   |         |                       |          |         |
|-----|----------------------|-----------------------|-----------------------|---|---------|-----------------------|----------|---------|
| 22  | 35.1 CH <sub>2</sub> | 37.4 CH <sub>2</sub>  | -                     | - | -       | 33.80 CH <sub>2</sub> | -        | -       |
| 23  | 28.0 CH <sub>3</sub> | 28.0 CH <sub>3</sub>  | -                     | - | -       | 25.9 CH <sub>2</sub>  | -        | -       |
| 24  | 15.5 CH <sub>3</sub> | 16.6 CH <sub>3</sub>  | -                     | - | -       | 45.6 CH               | -        | -       |
| 25  | 15.4 CH <sub>3</sub> | 15.5 CH <sub>3</sub>  | -                     | - | -       | 29.2 CH               | -        | -       |
| 26  | 25.9 CH <sub>3</sub> | 25.9 CH <sub>3</sub>  | -                     | - | -       | 19.6 CH <sub>3</sub>  | -        | -       |
| 27  | 29.9 CH <sub>3</sub> | 29.90 CH <sub>3</sub> |                       |   |         | 20.1 CH <sub>3</sub>  |          |         |
| 28  | 29.8 CH <sub>3</sub> | 29.8 CH <sub>3</sub>  | -                     | - | -       | 23.1 CH <sub>2</sub>  | -        | -       |
| 29  | 33.4 CH <sub>3</sub> | 33.3 CH <sub>3</sub>  | -                     | - | -       | 12.1 CH <sub>3</sub>  | -        | -       |
| 30  | 21.3 CH <sub>3</sub> | 21.3 CH <sub>3</sub>  | -                     | - | -       | -                     | -        | -       |
| 31  | -                    | 170.93 C=O            | -                     | - | -       | -                     | -        | -       |
| 32  | -                    | 21.3 CH <sub>3</sub>  | -                     | - | -       | -                     | -        | -       |
| 1'  | -                    | -                     | 64.8 CH <sub>2</sub>  | - | -       | 101.2 CH              | 126.8 C  | -       |
| 2'  | -                    | -                     | 28.8 CH <sub>2</sub>  | - | -       | 73.9 CH               | 114.2 CH | -       |
| 3'  | -                    | -                     | 26.00 CH <sub>2</sub> | - | -       | 77.2 CH               | 145.4 C  | -       |
| 4'  | -                    | -                     | 29.72 CH <sub>2</sub> | - | 111.5 C | 70.6 CH               | 148.1 C  | 115.0 C |
| 5'  | -                    | -                     | 29.62 CH <sub>2</sub> | - | -       | 77.12 CH              | 115.1 CH | -       |
| 6'  | -                    | -                     | 29.38 CH <sub>2</sub> | - | -       | 61.6 CH <sub>2</sub>  | 121.7 CH | -       |
| 7'  | -                    | -                     | 29.32 CH <sub>2</sub> | - | -       | -                     | 145.9 CH | -       |
| 8'  | -                    | -                     | 29.56 CH <sub>2</sub> | - | 150.3 C | -                     | 113.8 CH | 142.8 C |
| 9'  | -                    | -                     | 29.68 CH <sub>2</sub> | - | -       | -                     | 167.5 C  | -       |
| 10' | -                    | -                     | 32.0 CH <sub>2</sub>  | - | -       | -                     | -        | -       |



|                  |   |   |                      |      |      |   |          |                      |
|------------------|---|---|----------------------|------|------|---|----------|----------------------|
| 11'              | - | - | 22.7 CH <sub>2</sub> | -    | -    | - | -        | -                    |
| 12'              | - | - | 14.1 CH <sub>3</sub> | -    | -    | - | -        | -                    |
| 1''              | - | - | -                    | -    | -    | - | 126.4 C  | 102.6 CH             |
| 2''              | - | - | -                    | -    | -    | - | 113.9 CH | 74.5 CH              |
| 3''              | - | - | -                    | -    | -    | - | 145.4 C  | 77.9 CH              |
| 4''              | - | - | -                    | -    | -    | - | 148.1 C  | 70.3 CH              |
| 5''              | - | - | -                    | -    | -    | - | 115.1 CH | 76.9 CH              |
| 6''              | - | - | -                    | -    | -    | - | 121.6 CH | 61.2 CH <sub>2</sub> |
| 7''              | - | - | -                    | -    | -    | - | 145.7 CH | -                    |
| 8''              | - | - | -                    | -    | -    | - | 113.8 CH | -                    |
| 9''              | - | - | -                    | -    | -    | - | 167.0 C  | -                    |
| OCH <sub>3</sub> | - | - | -                    | 56.0 | 56.4 | - | 55.49    | 56.5                 |
| OCH <sub>3</sub> |   |   |                      |      |      |   | 55.17    | 61.7                 |

1. Spectral data of compound A

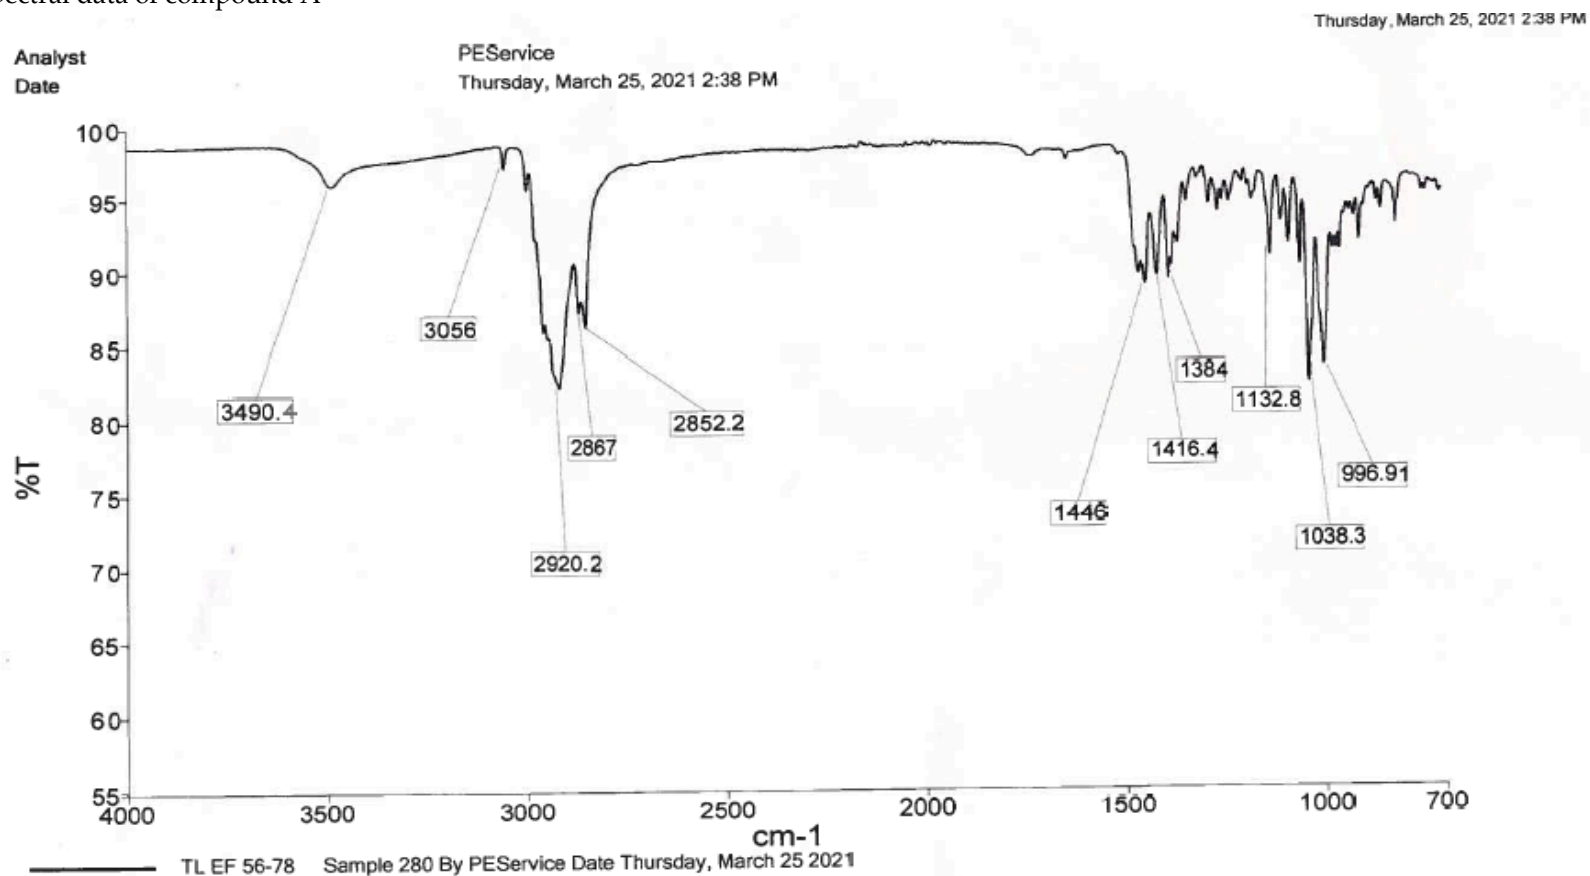

Figure SA.1: Fourier-Transform Infrared Spectroscopy (FTIR) spectrum of (3β)- D-Friedoolean-14-en-3-ol (3β Taraxerol).

TLB\_BC7\_01\_9396.mzXML#1928 @2.89 MS1 c +, base peak: 637.3050 m/z (7.9E3)

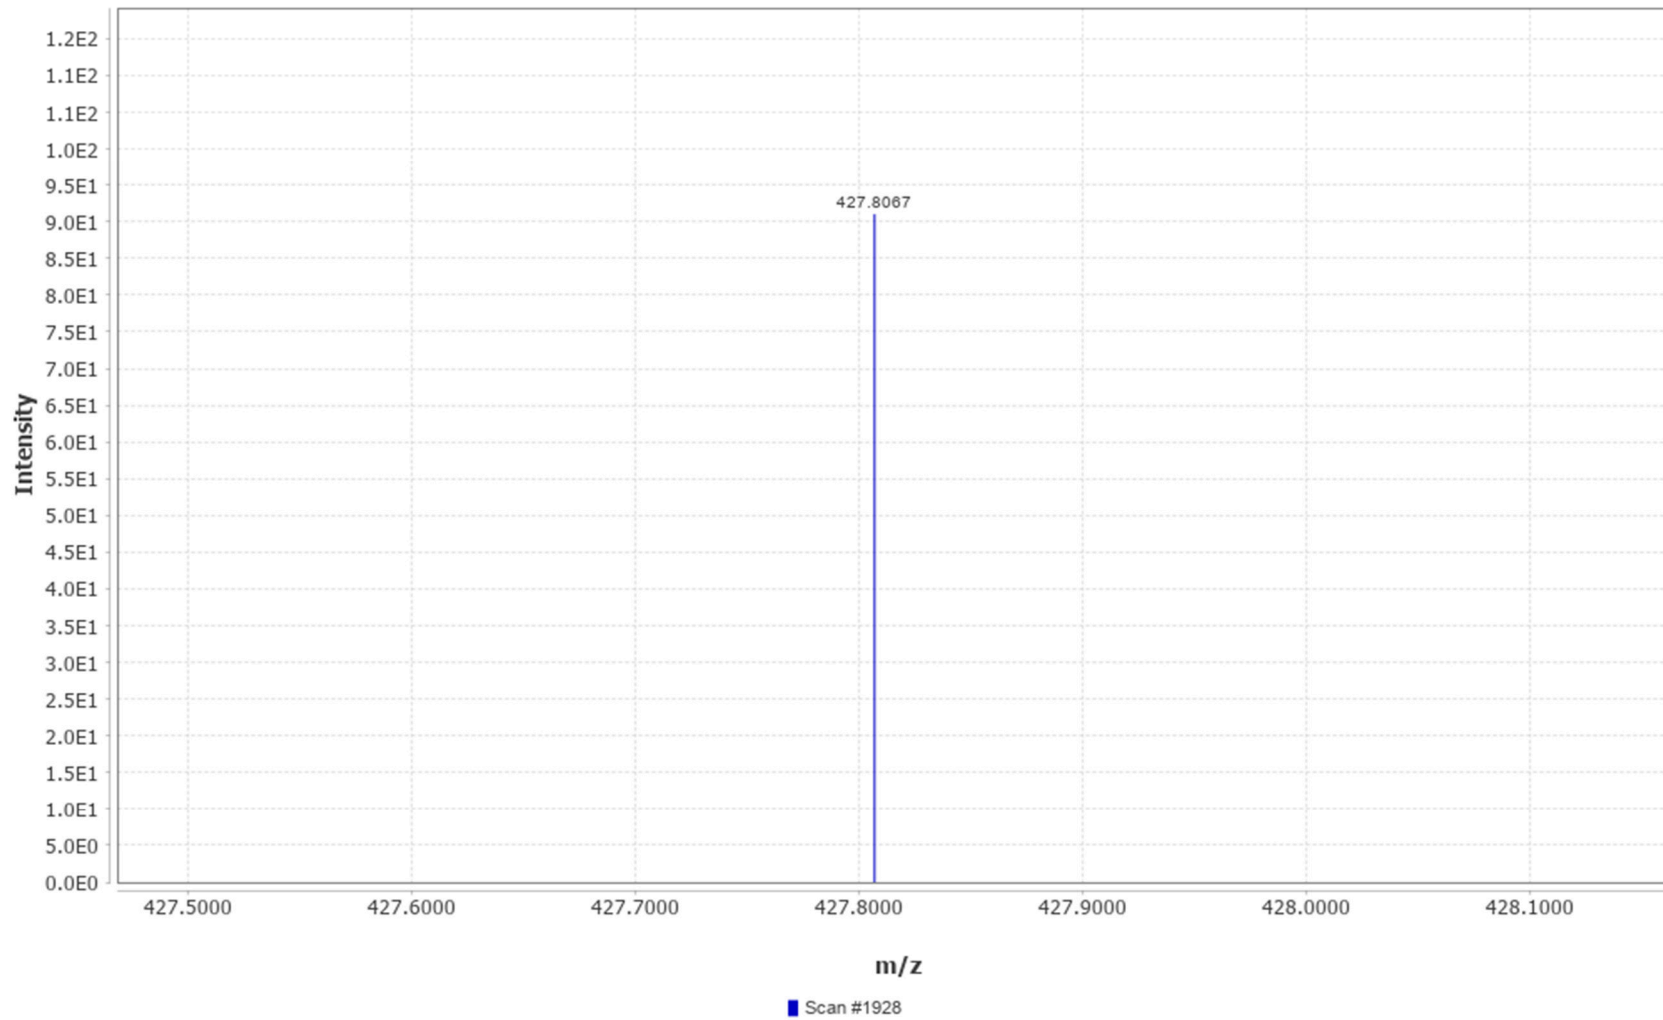

Figure SA.2: High-Resolution Electrospray Ionization Mass spectrum (HR-ESI-MS) of 3 $\beta$  Taraxerol [M+H]<sup>+</sup> m/z = 427.8067

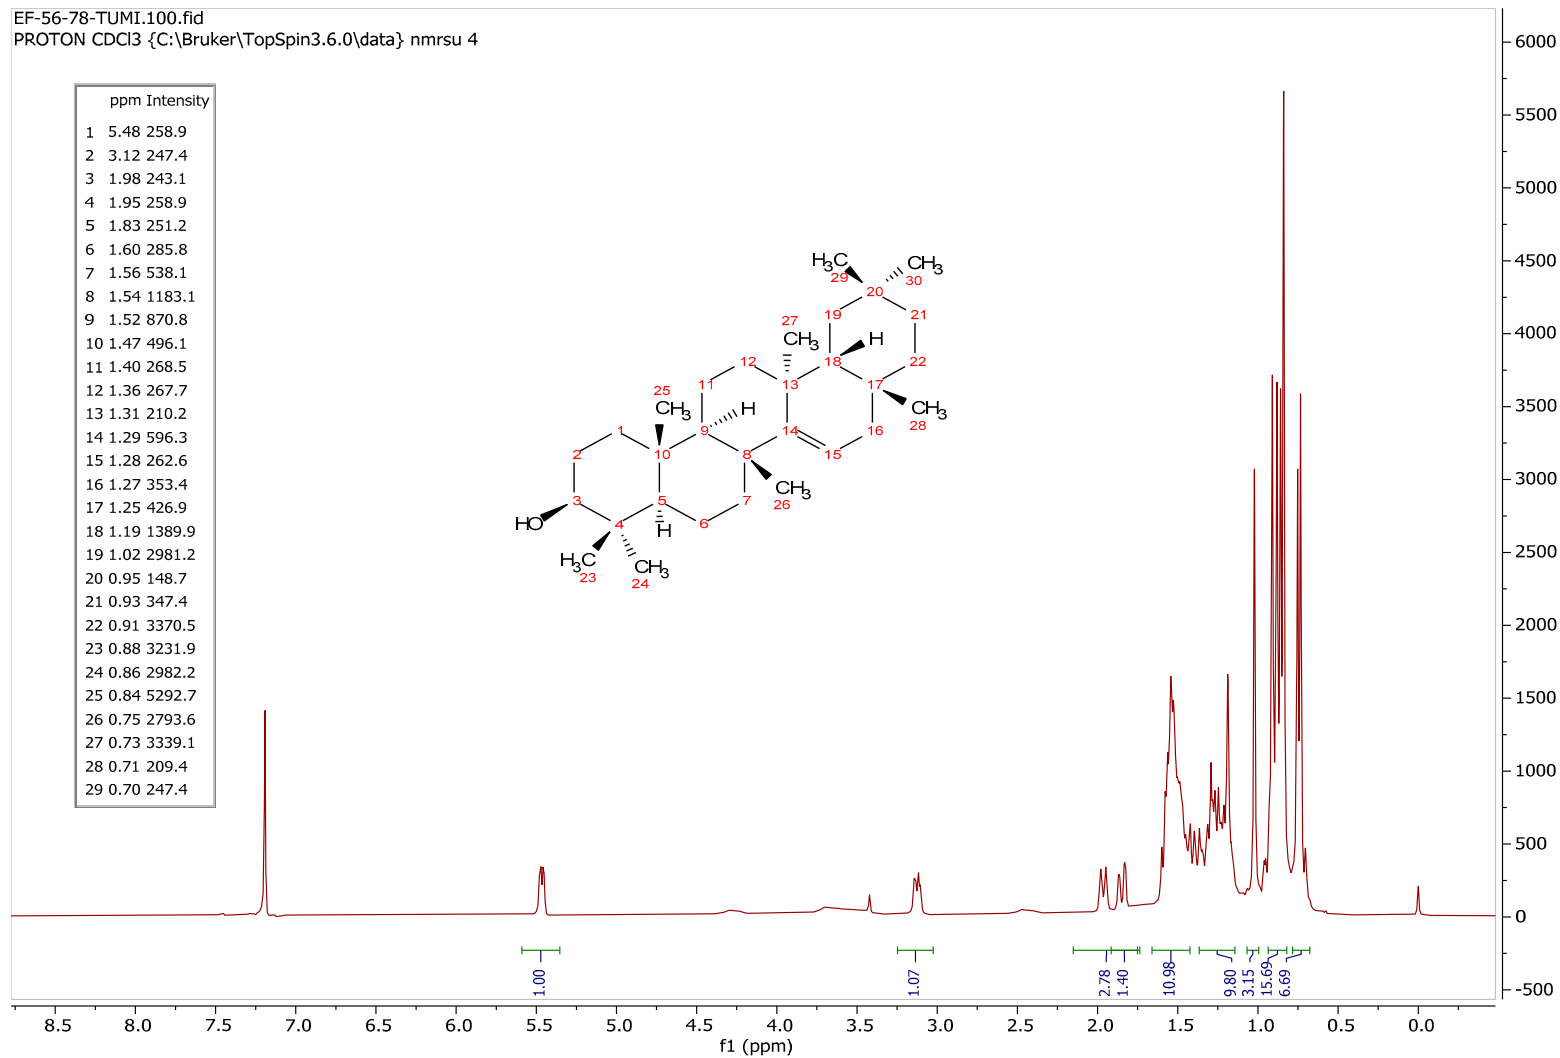

Figure SA.3: Proton Nuclear Magnetic Resonance (<sup>1</sup>H NMR) spectrum of 3β Taraxerol (CDCl<sub>3</sub>, 400 MHz)

EF-56-78-TUMI.101.fid

C13CPD CDCl3 {C:\Bruker\TopSpin3.6.0\data} nmrsu 4

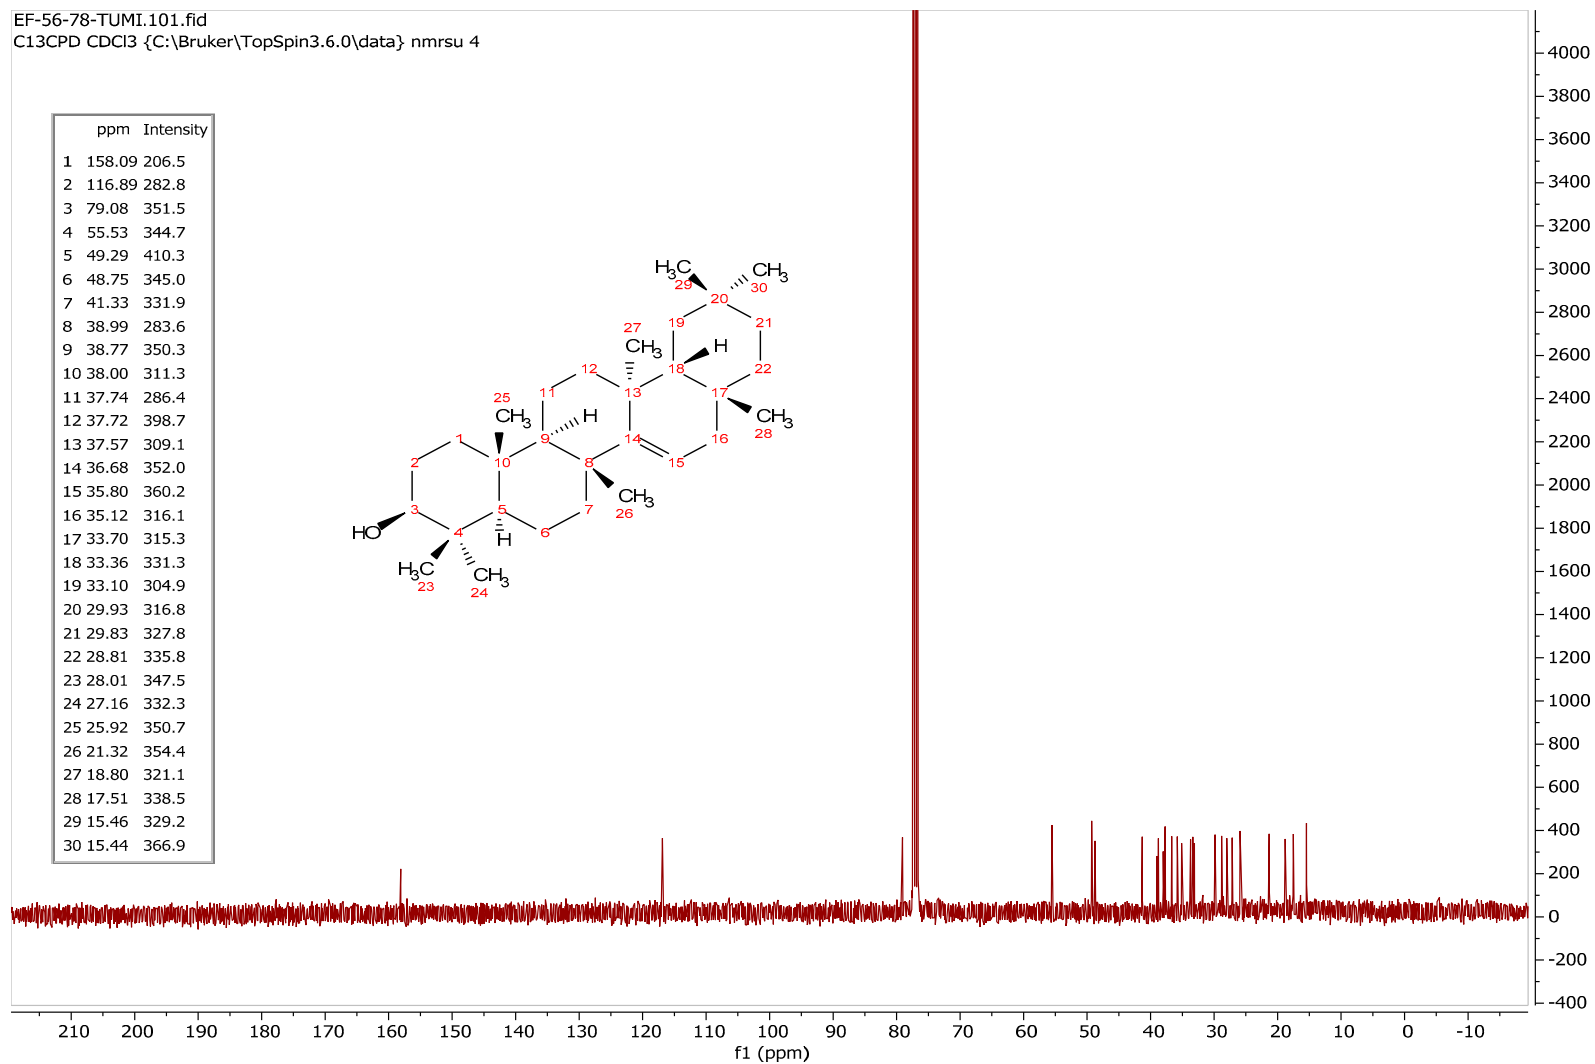

Figure SA.4: Carbon-13 Nuclear Magnetic Resonance ( $^{13}\text{C}$  NMR) spectrum of  $3\beta$  Taraxerol ( $\text{CDCl}_3$ , 100 MHz)

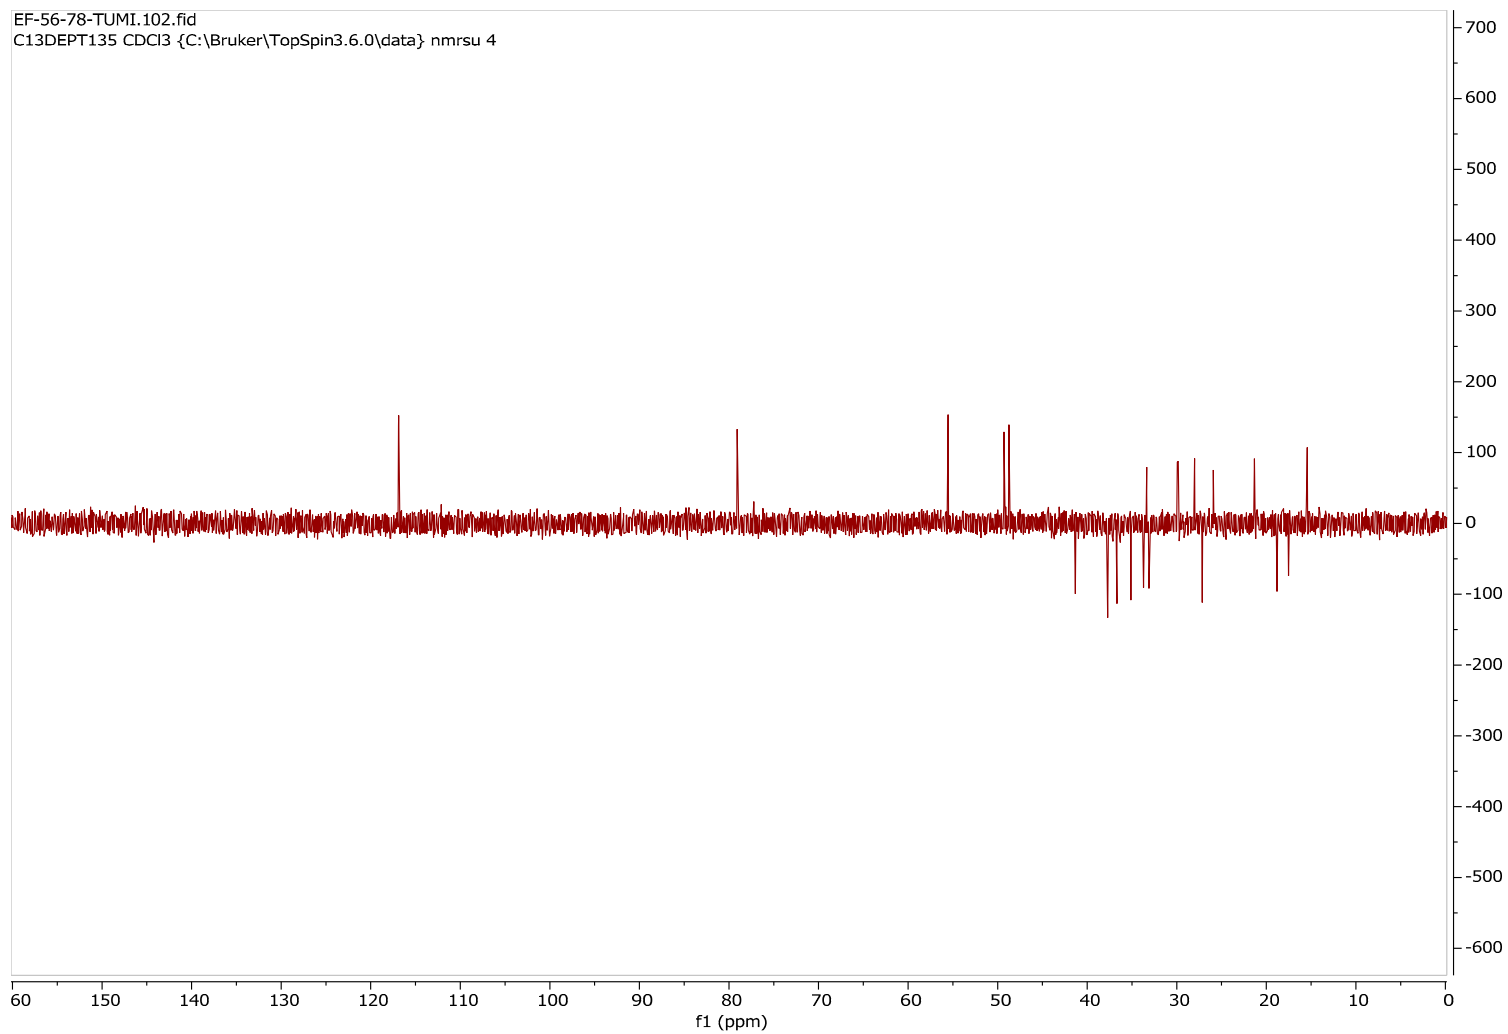

Figure SA.5: Distortionless Enhancement by Polarization Transfer (DEPT) NMR spectra of 3 $\beta$  Taraxerol (CDCl<sub>3</sub>, 100 MHz)

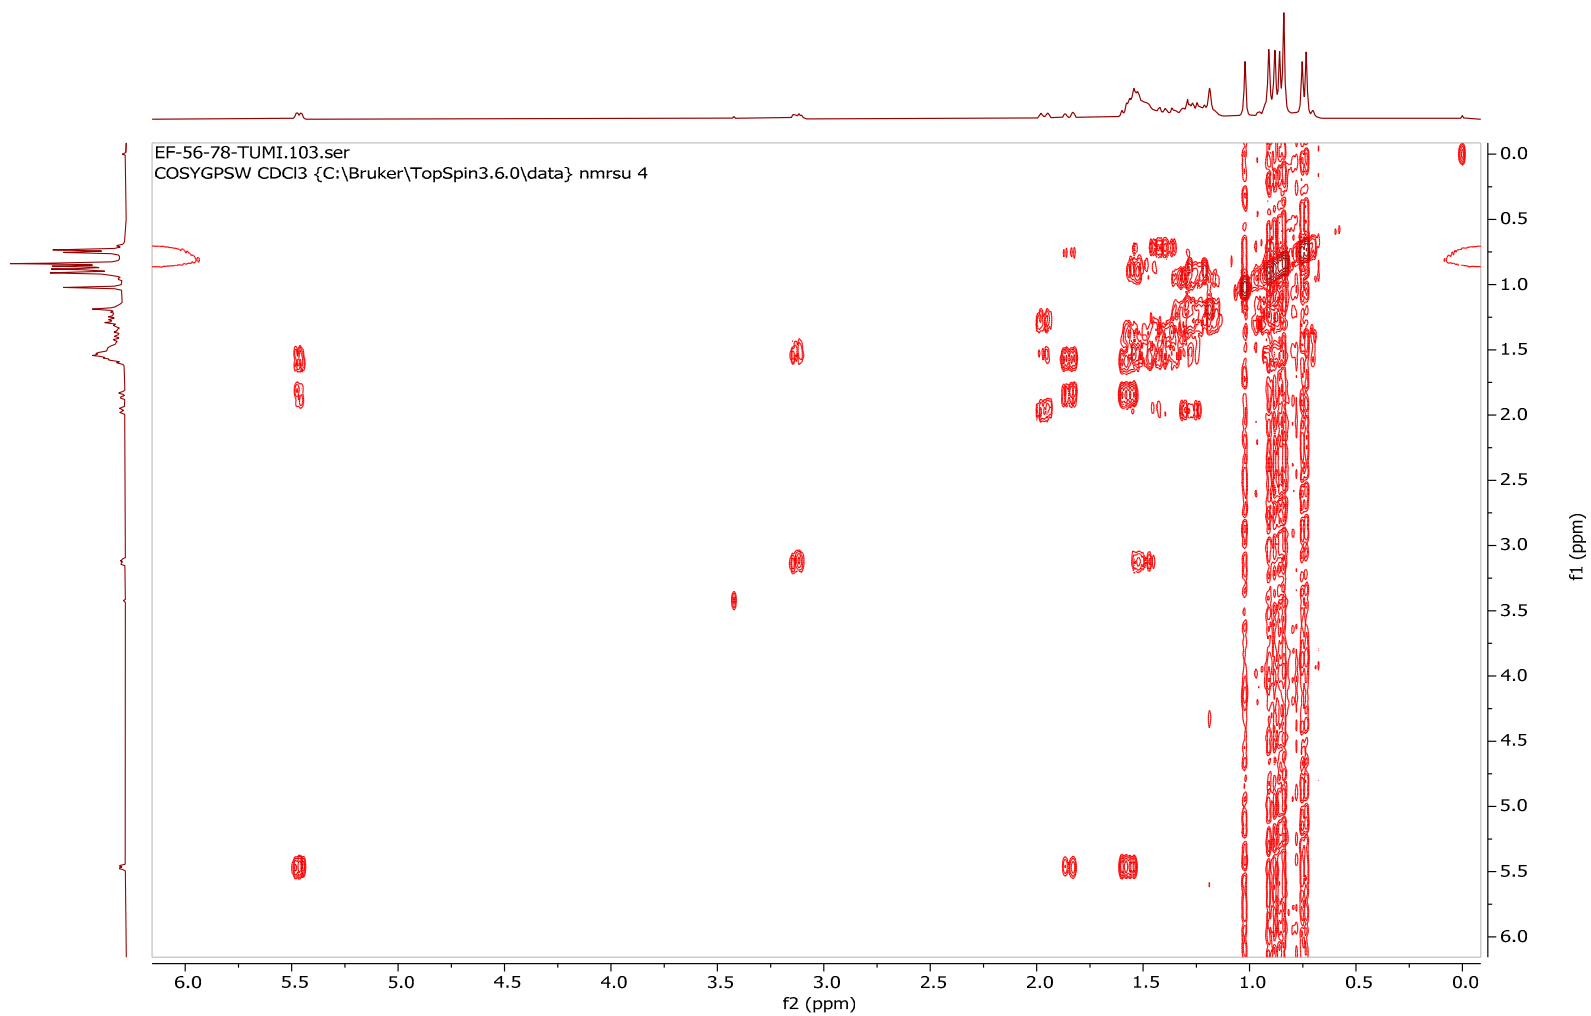

Figure SA.6: Gradient Correlated (gCOSY) spectrum of 3 $\beta$  Taraxerol

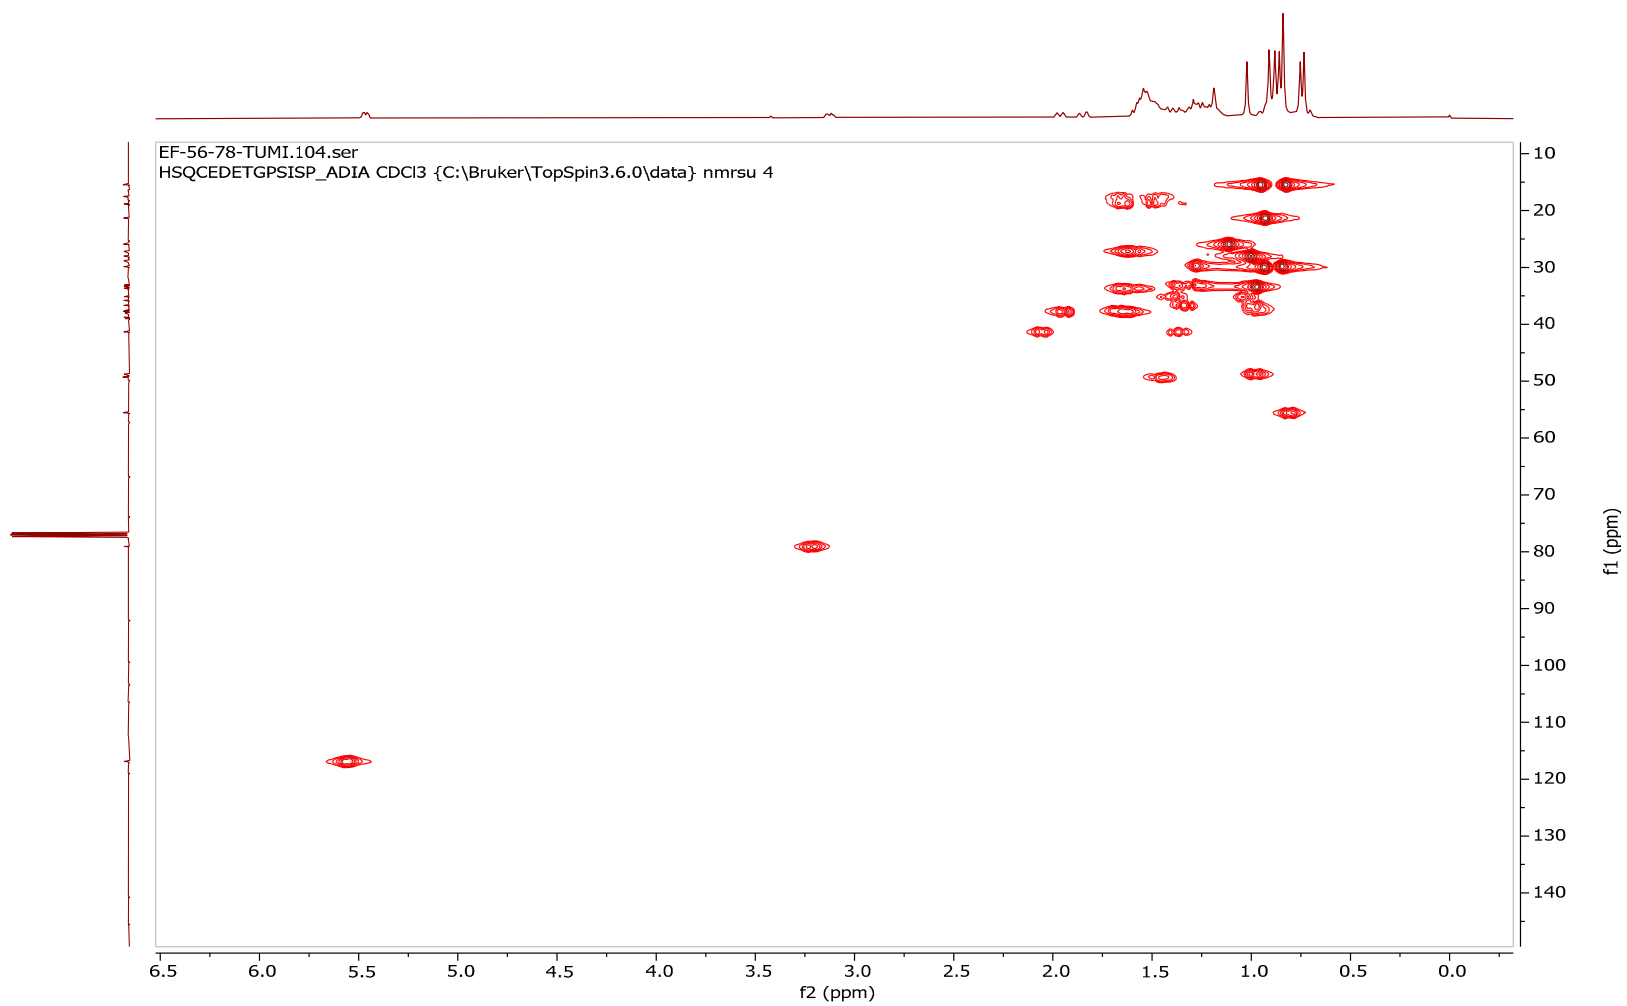

Figure SA.7: Gradient Heteronuclear Single Quantum Coherence (gHSQC) spectrum of  $3\beta$  Taraxerol



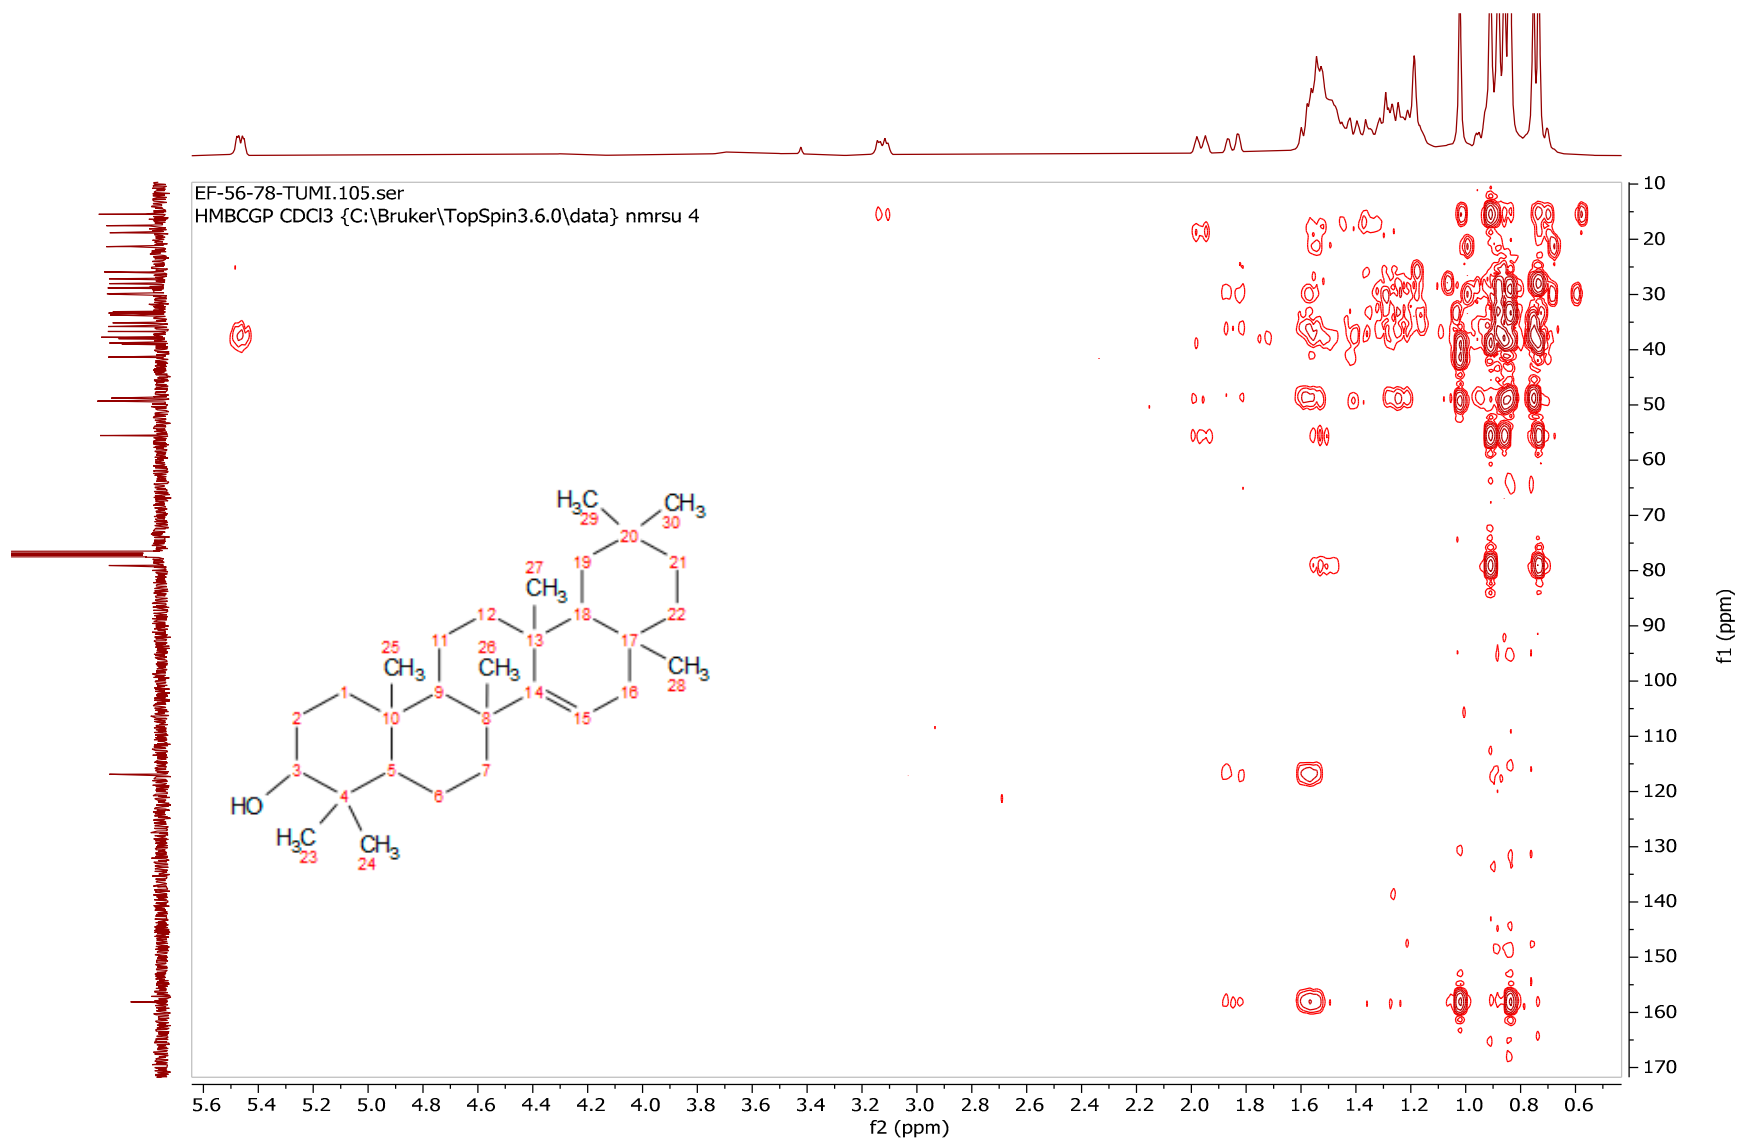

Figure SA.8: Gradient Heteronuclear Multiple Bond Quantum Coherence (gHMBC) spectrum of 3β Taraxerol

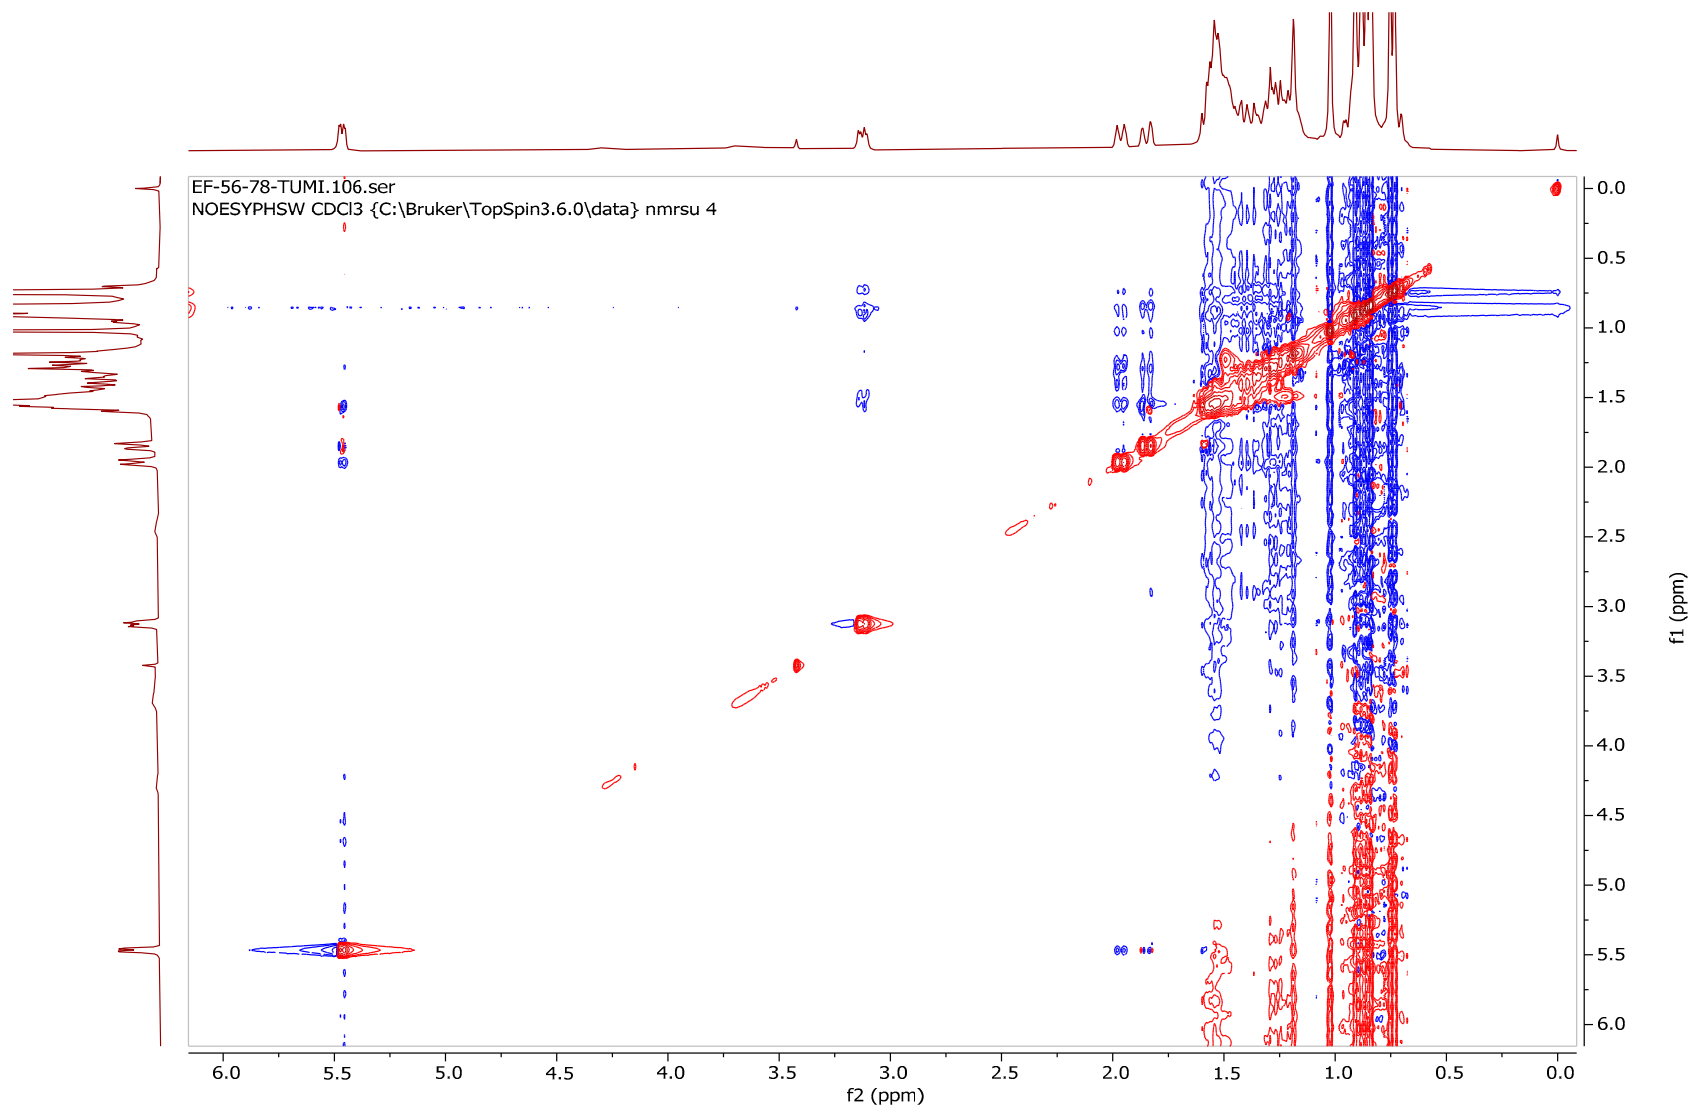

Figure SA.9: Nuclear Overhauser Effect Spectroscopy (NOESY) spectrum of 3 $\beta$  Taraxerol

## 2. Spectral data of Compound B

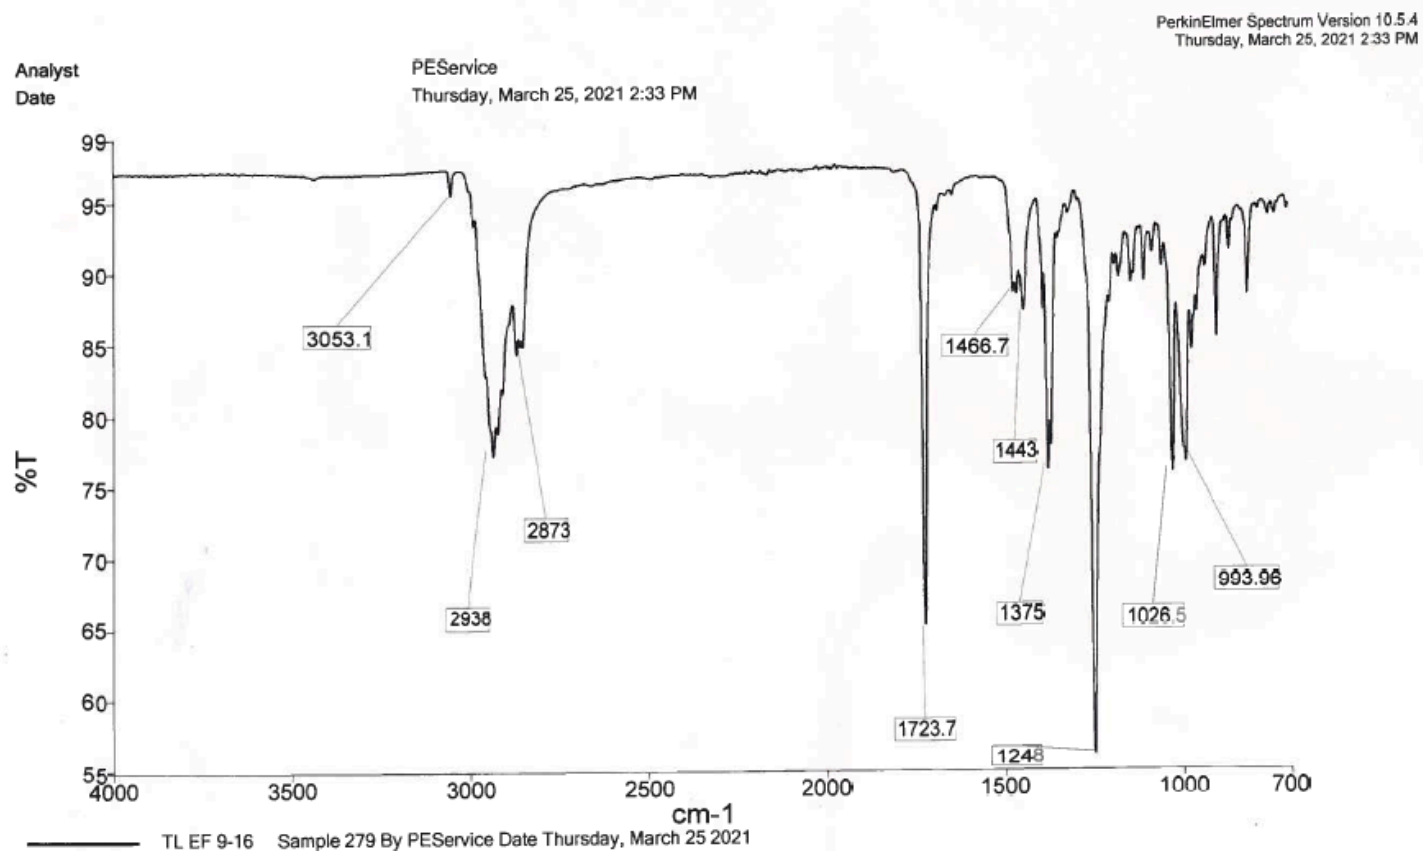

Figure SB.10: Fourier-Transform Infrared Spectroscopy (FTIR) spectrum of Acetyl (3 $\beta$ )- D-Friedoolean-14-en-3-ol (3 $\beta$  Acetyl taraxerol)

TLA\_BC6\_01\_9395.mzXML#1748 @2.61 MS1 c +, base peak: 290.2697 m/z (1.1E4)

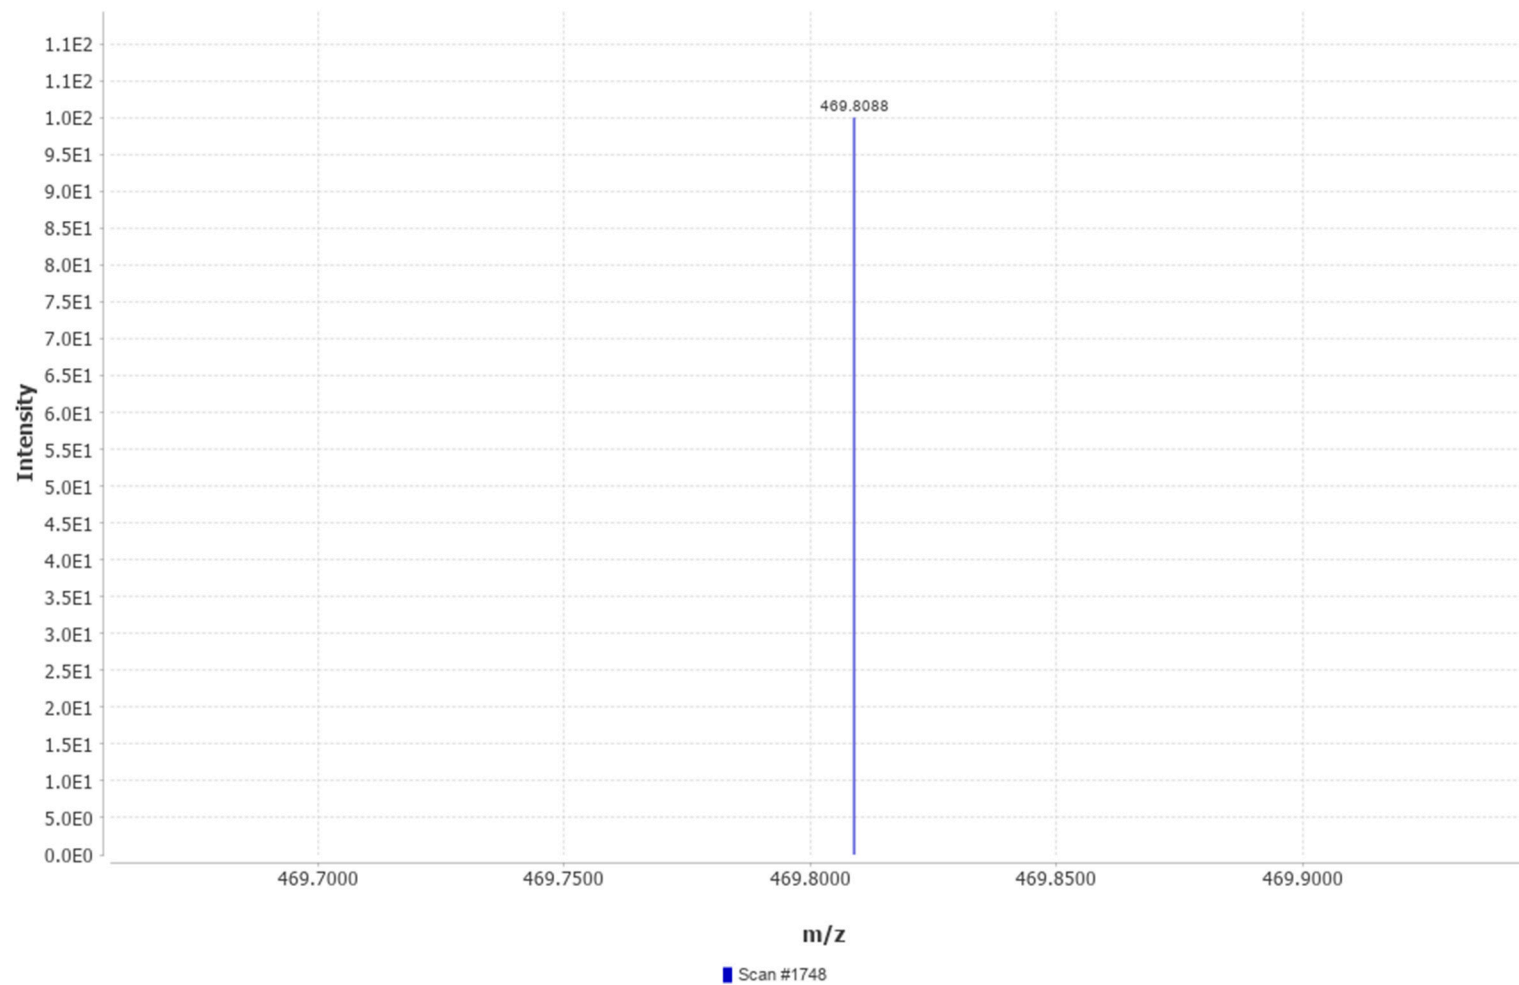

Figure SB.11: High-Resolution Electrospray Ionization Mass spectrum (HR-ESI-MS) of 3 $\beta$  Acetyl taraxerol [M+H]<sup>+</sup> m/z = 469.8088

EF-9-16-TUMI.100.fid  
 PROTON CDCl3 {C:\Bruker\TopSpin3.6.0\data} nmrsu 5

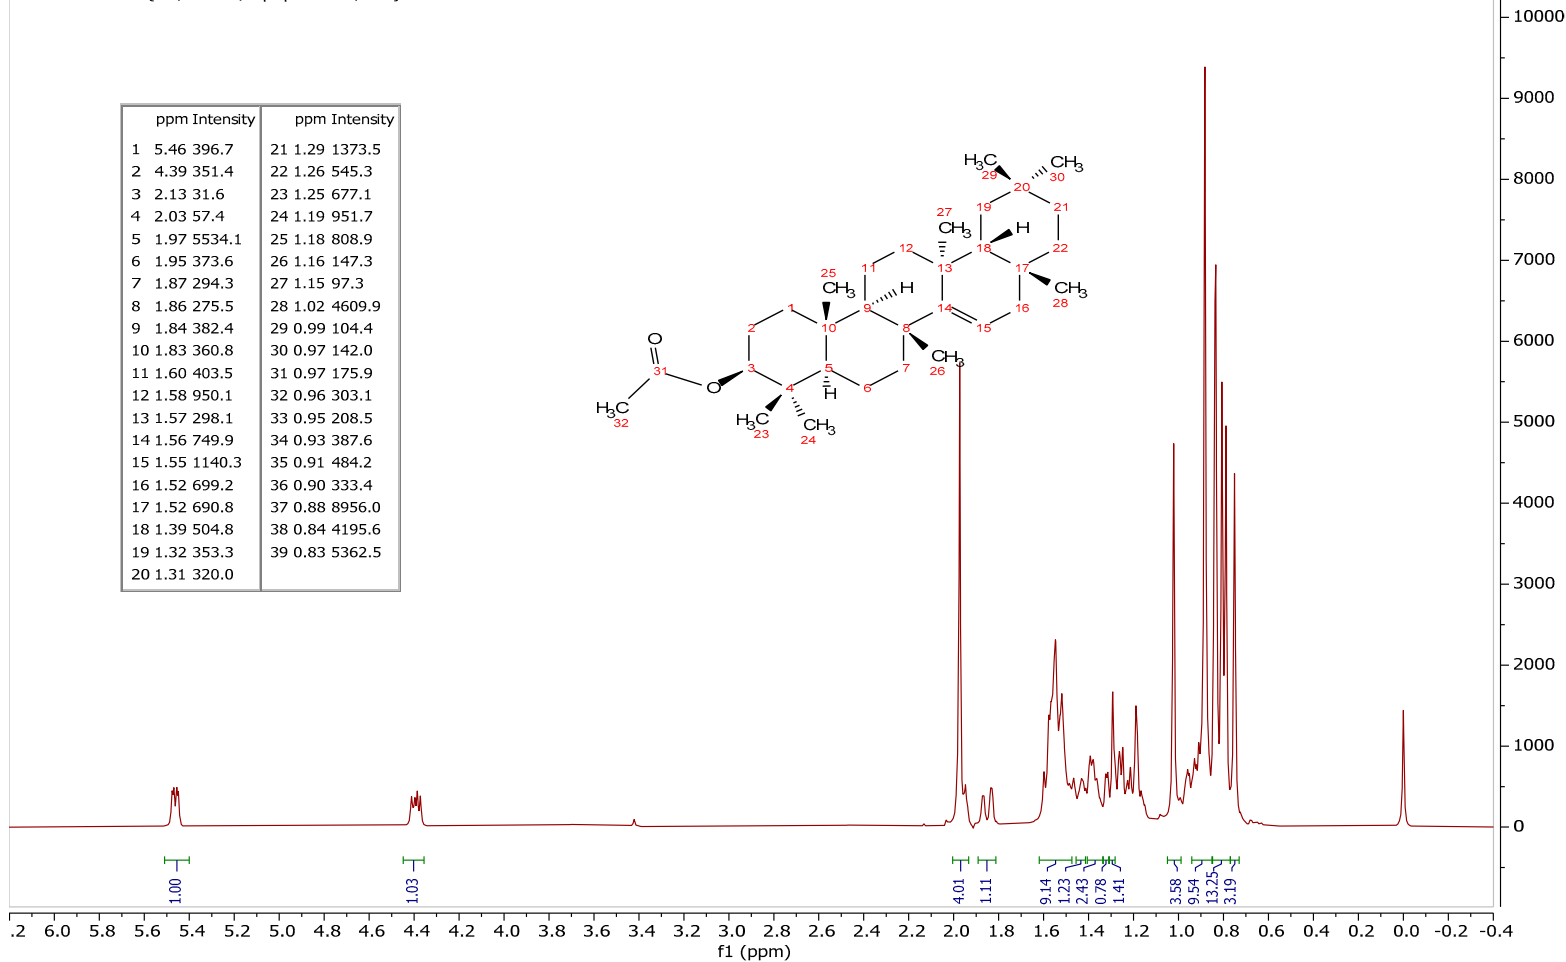

Figure SB.12: Proton Nuclear Magnetic Resonance (<sup>1</sup>H NMR) spectrum of 3β Acetyl taraxerol (CDCl<sub>3</sub>, 400 MHz)

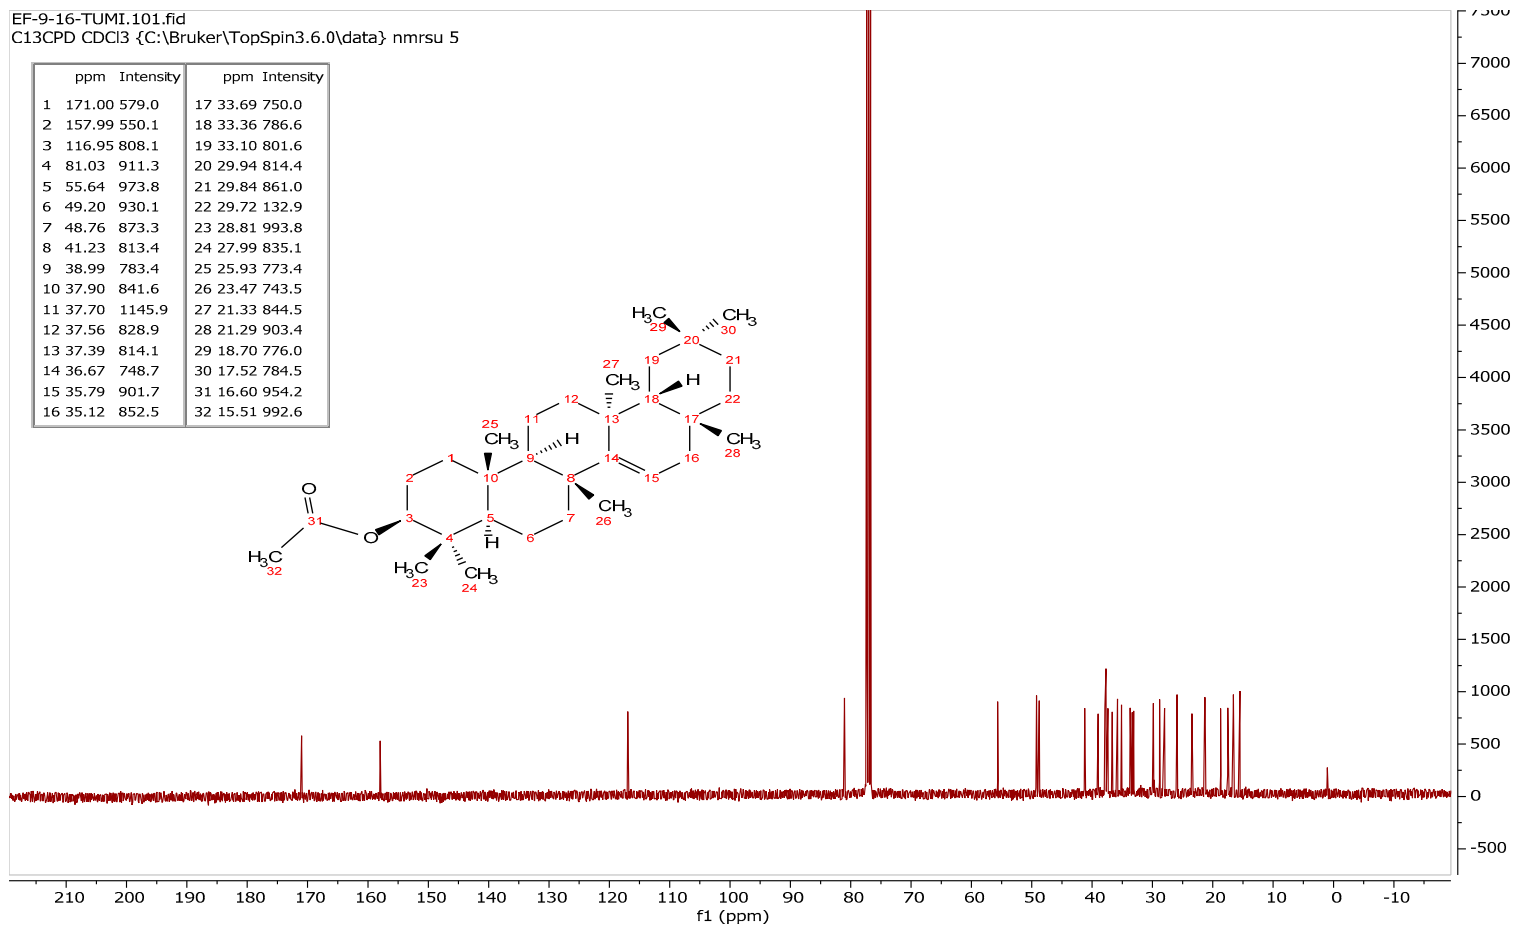

Figure SB.13: Carbon-13 Nuclear Magnetic Resonance ( $^{13}\text{C}$  NMR) spectrum of  $3\beta$  Acetyl taraxerol ( $\text{CDCl}_3$ , 100 MHz)

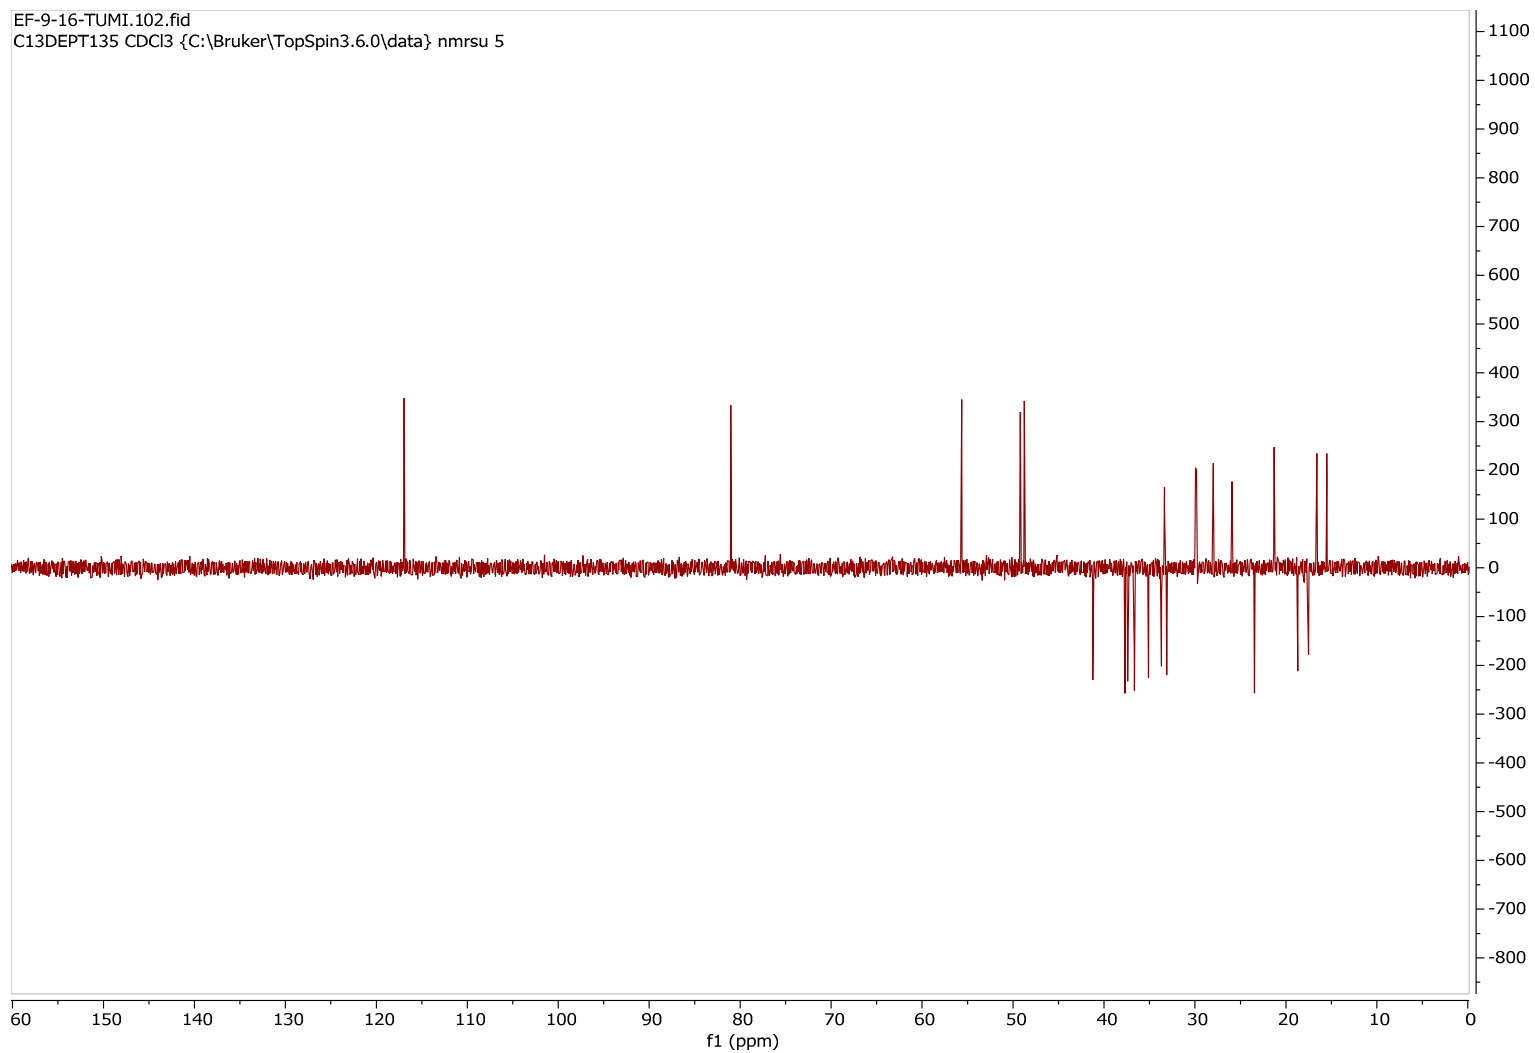

**Figure SB.14: Distortionless Enhancement by Polarization Transfer (DEPT) NMR spectra of 3 $\beta$  Acetyl taraxerol (CDCl<sub>3</sub>, 100 MHz)**

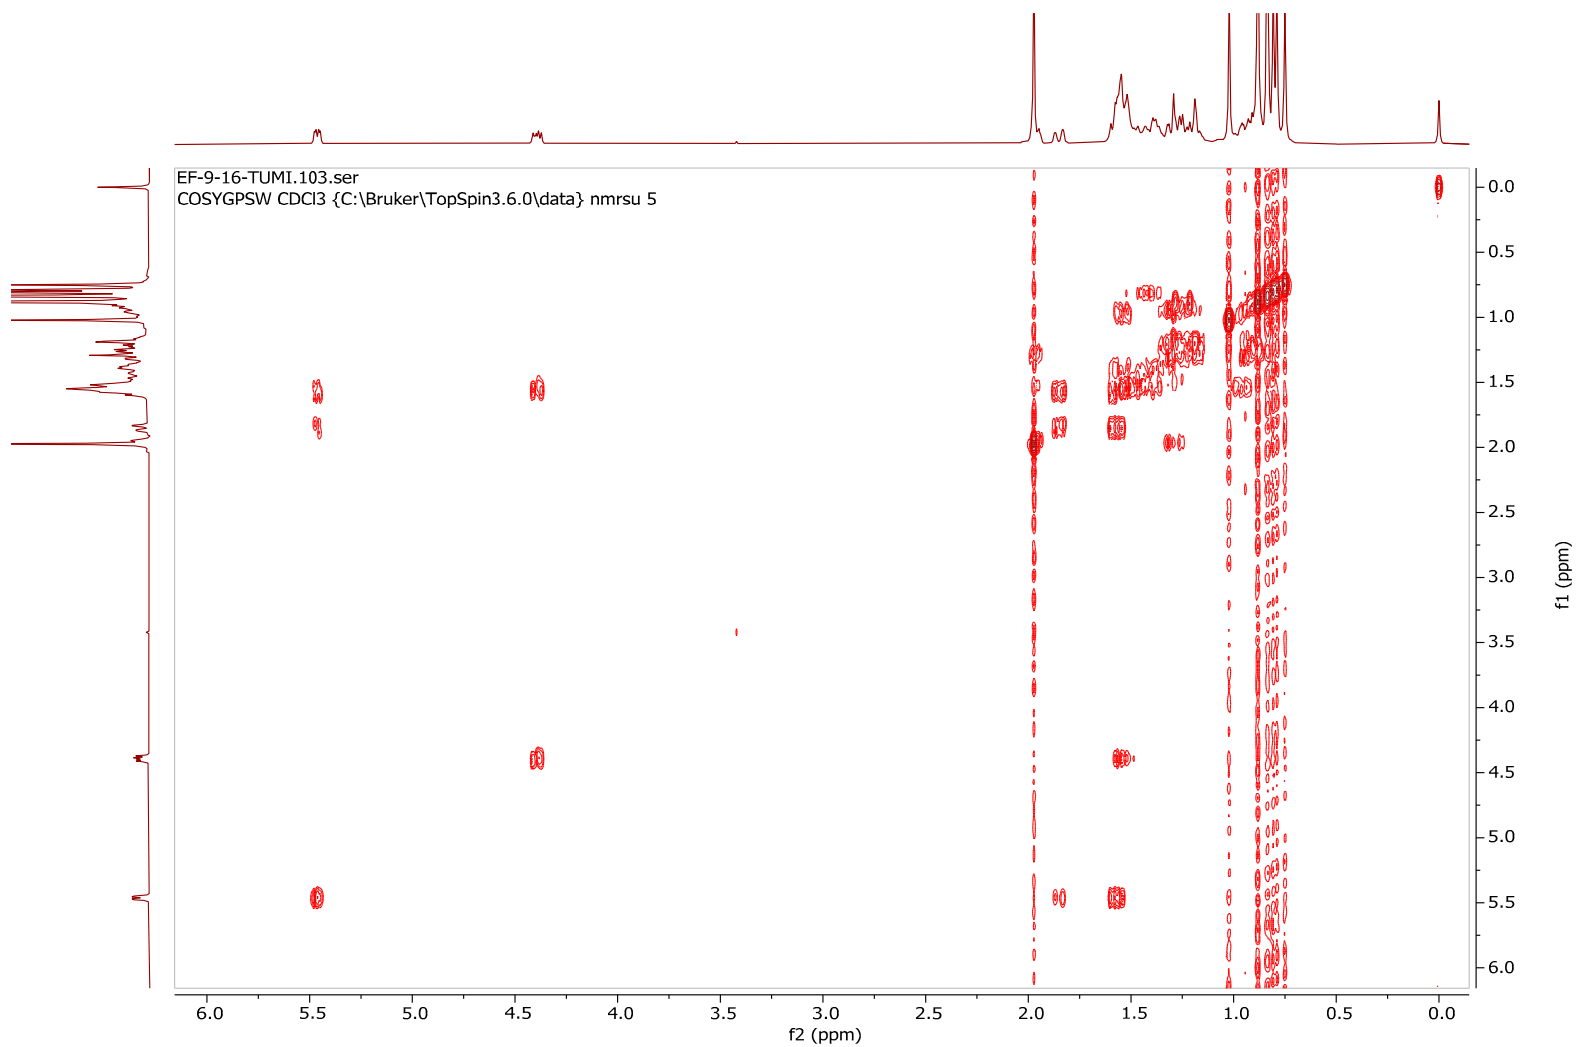

Figure SB.15: Gradient Correlated (gCOSY) spectrum of 3 $\beta$  Acetyl taraxerol



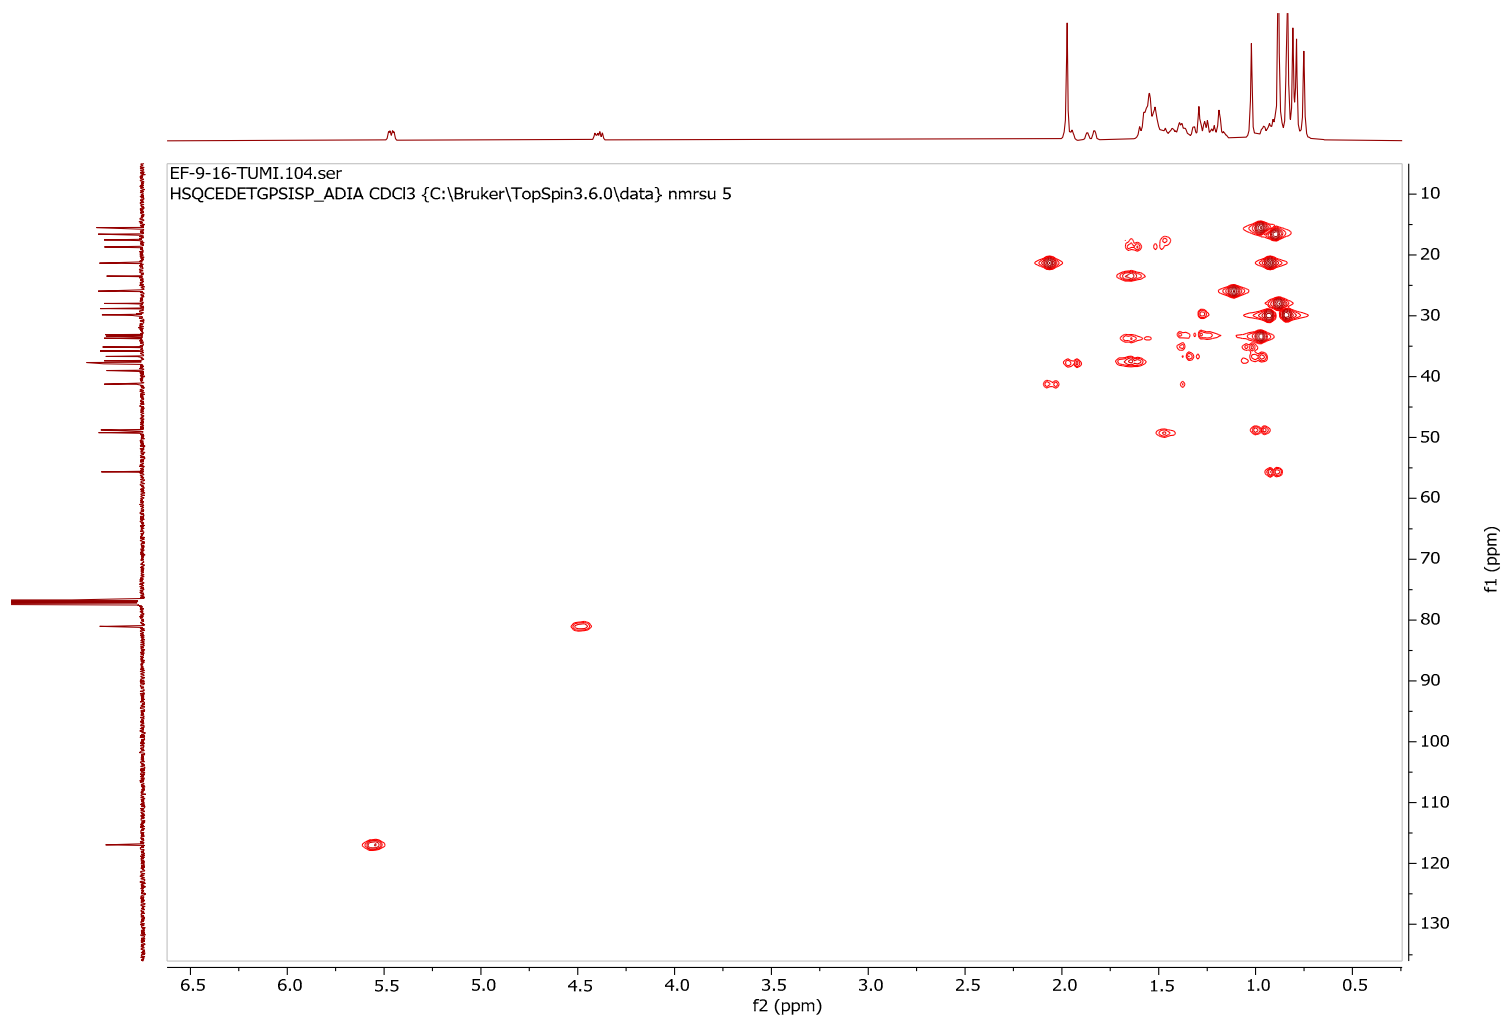

Figure SB.16: Gradient Heteronuclear Single Quantum Coherence (gHSQC) spectrum of 3 $\beta$  Acetyl taraxerol

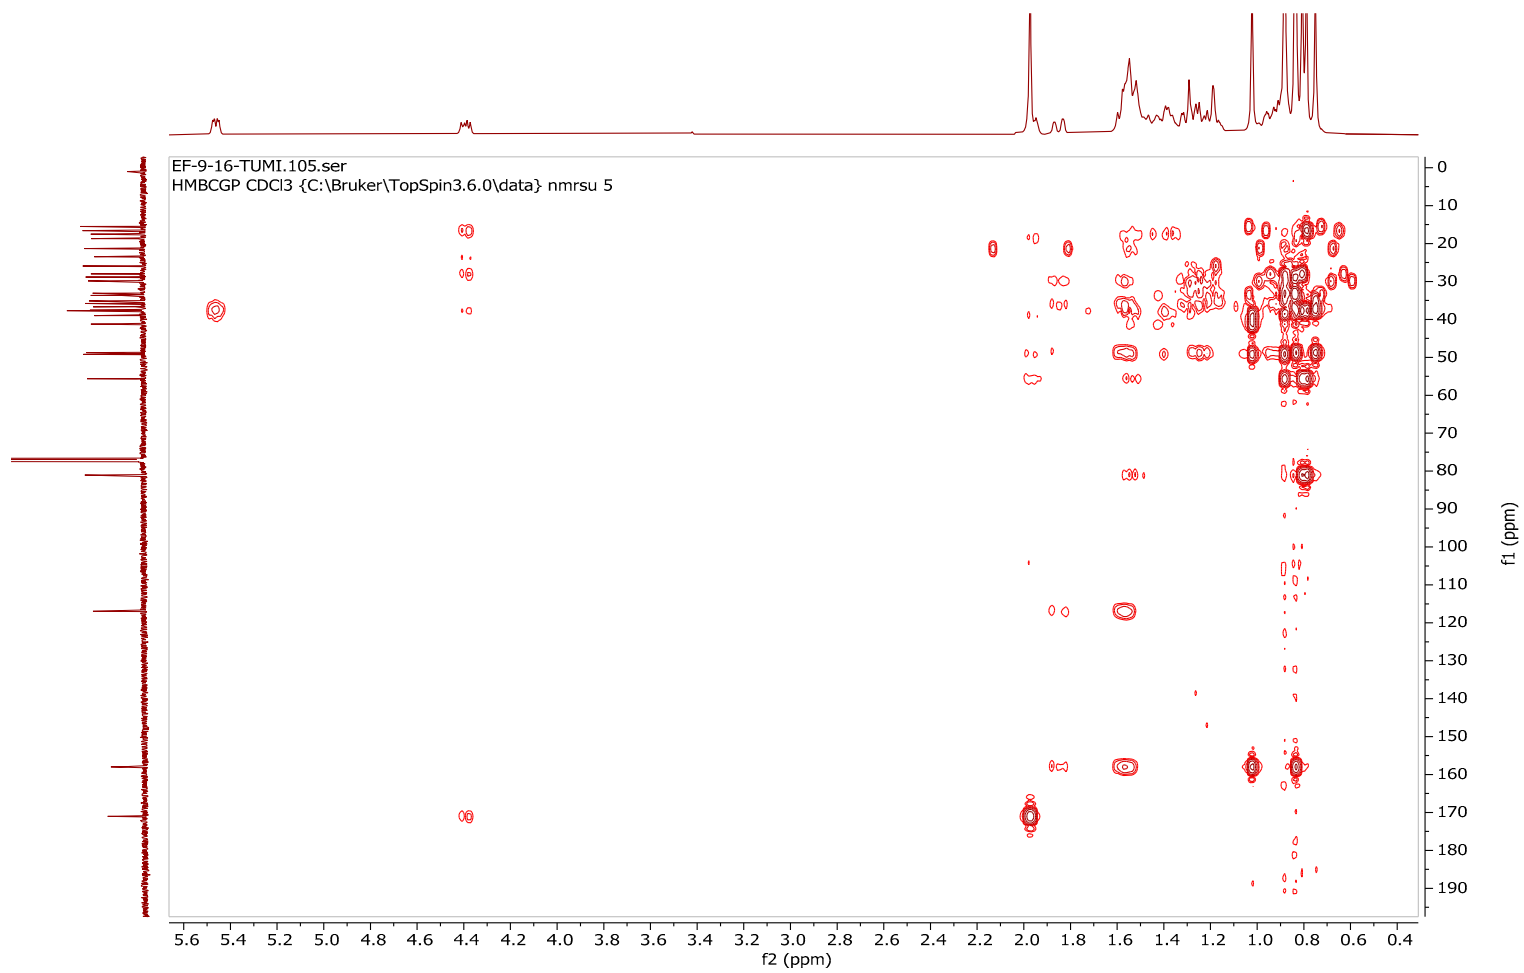

Figure SB.17: Gradient Heteronuclear Multiple Bond Quantum Coherence (gHMBC) spectrum of 3 $\beta$  Acetyl taraxerol

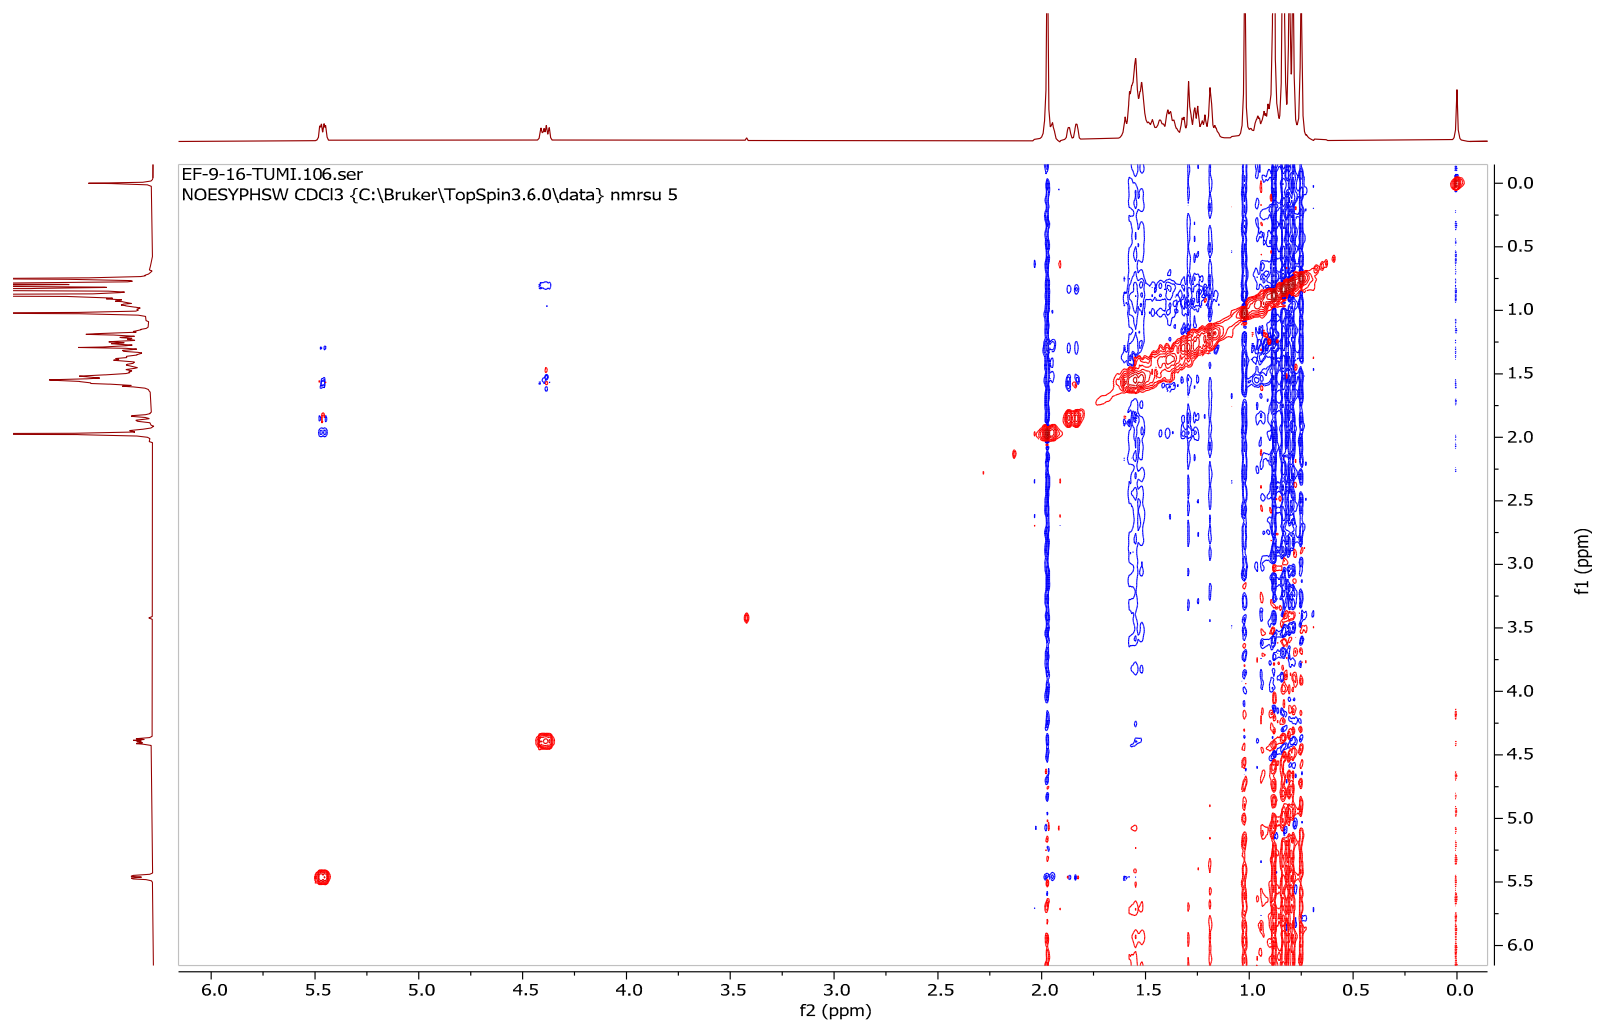

Figure SB.18: Nuclear Overhauser Effect Spectroscopy (NOESY) spectrum of  $3\beta$  Acetyl taraxerol

### 3. Spectral data of Compound C

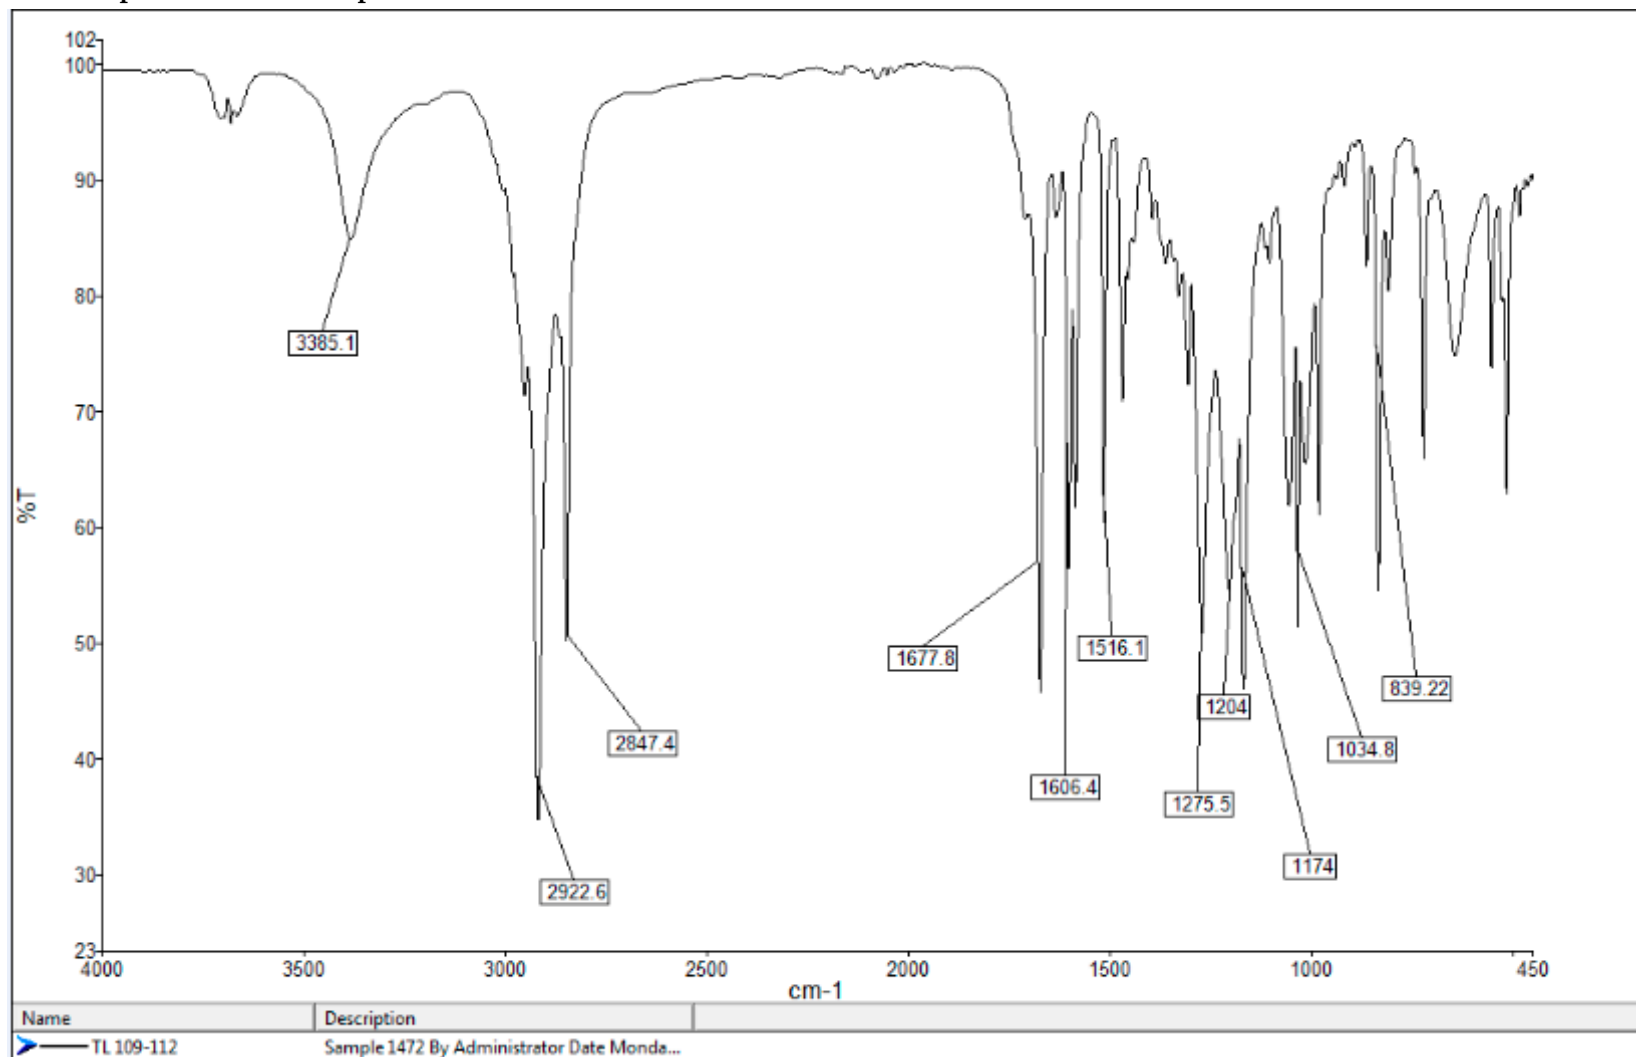

Figure SC.19: Fourier-Transform Infrared Spectroscopy (FTIR) spectrum of Dodecyl P Coumarate [Dodecyl (*E*)-3-(4-hydroxyphenyl) prop-2-enoate]

TLC\_BC8\_01\_9397.mzXML#1774 @2.67 MS1 c +, base peak: 214.2173 m/z (1.2E4)

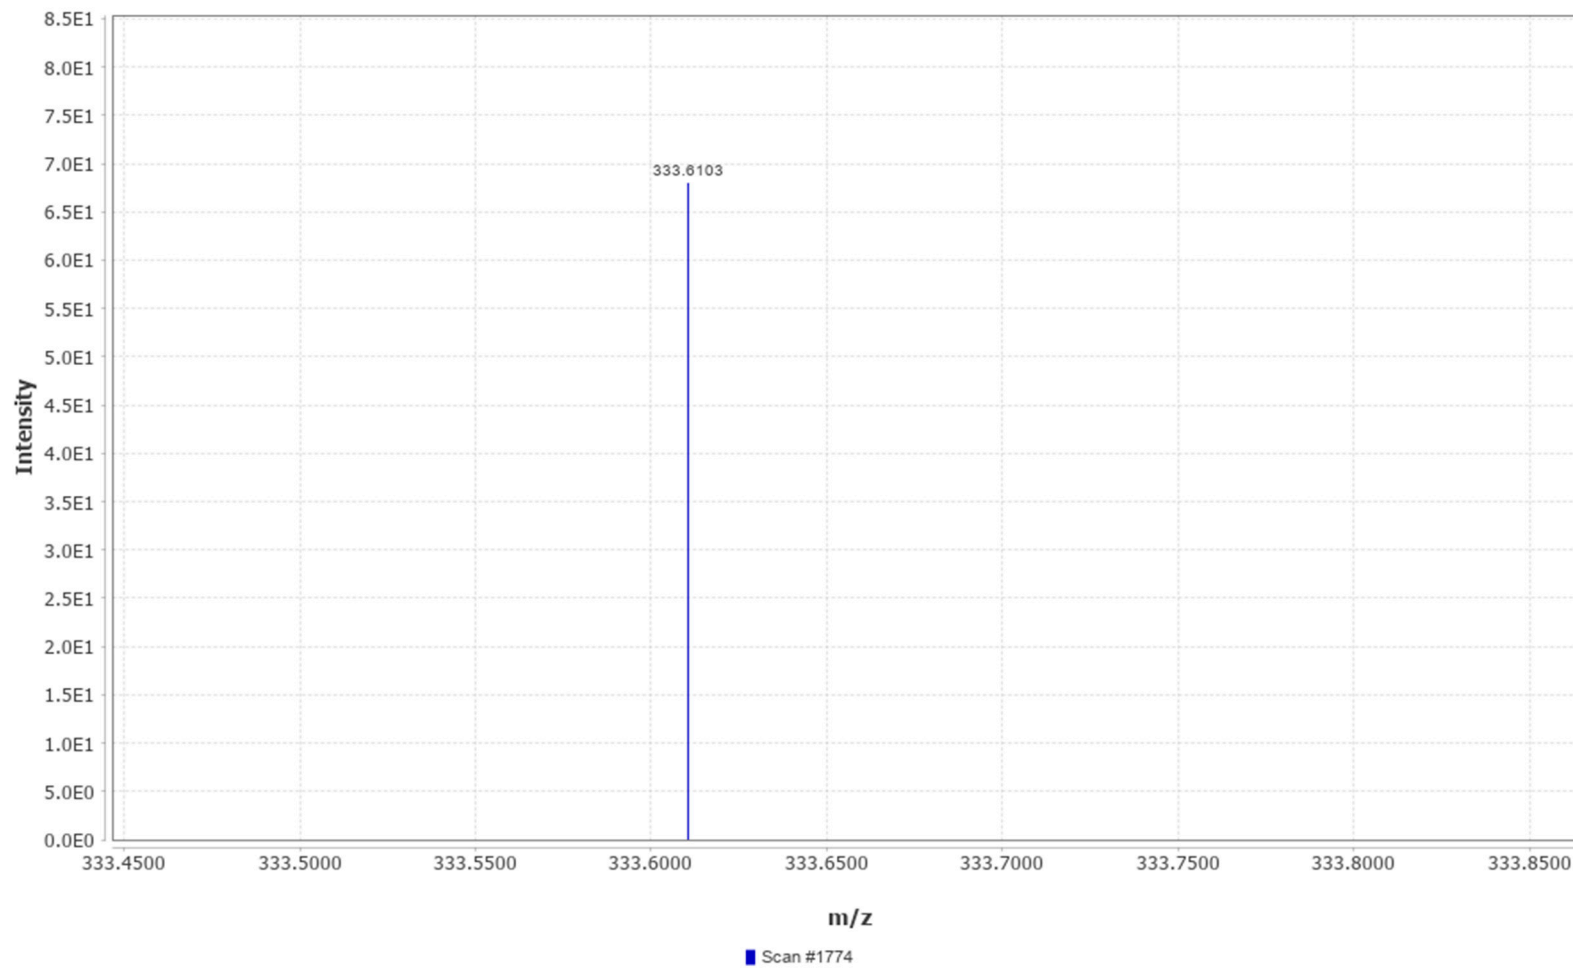

Figure SC.20: High-Resolution Electrospray Ionization Mass spectrum (HR-ESI-MS) of Dodecyl P Coumarate [M+H]<sup>+</sup> m/z = 333.6103

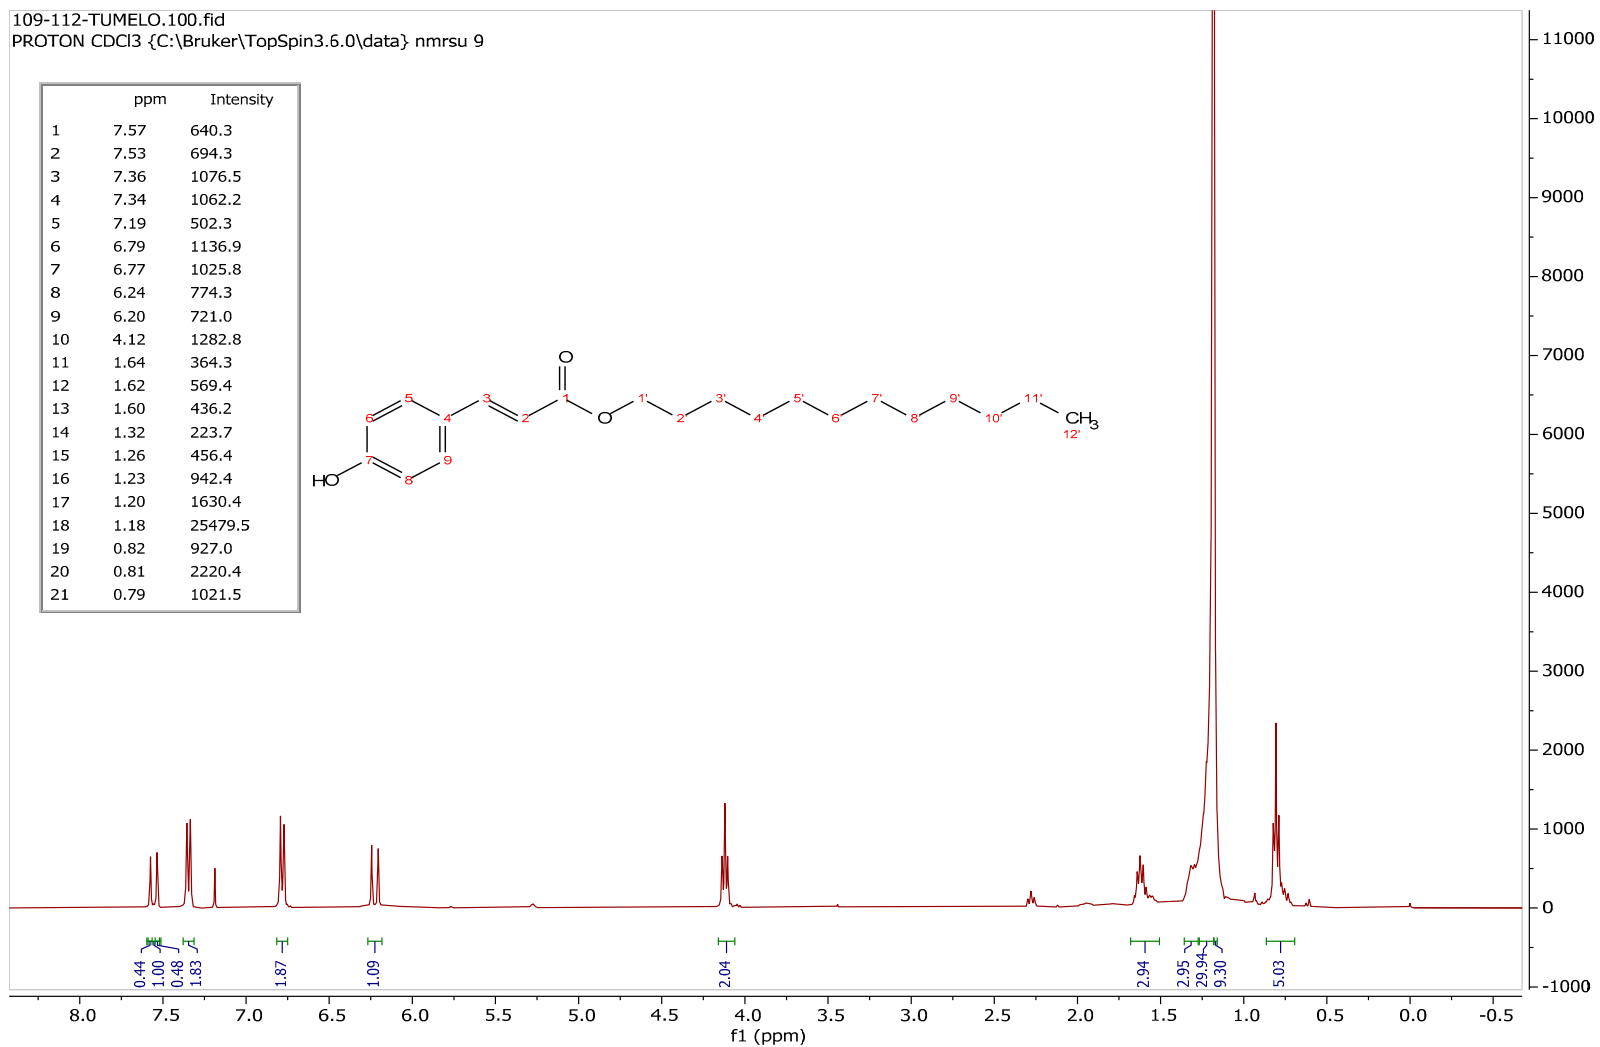

Figure SC.21: Proton Nuclear Magnetic Resonance ( $^1\text{H}$  NMR) spectrum of Dodecyl P Coumarate ( $\text{CDCl}_3$ , 400 MHz)

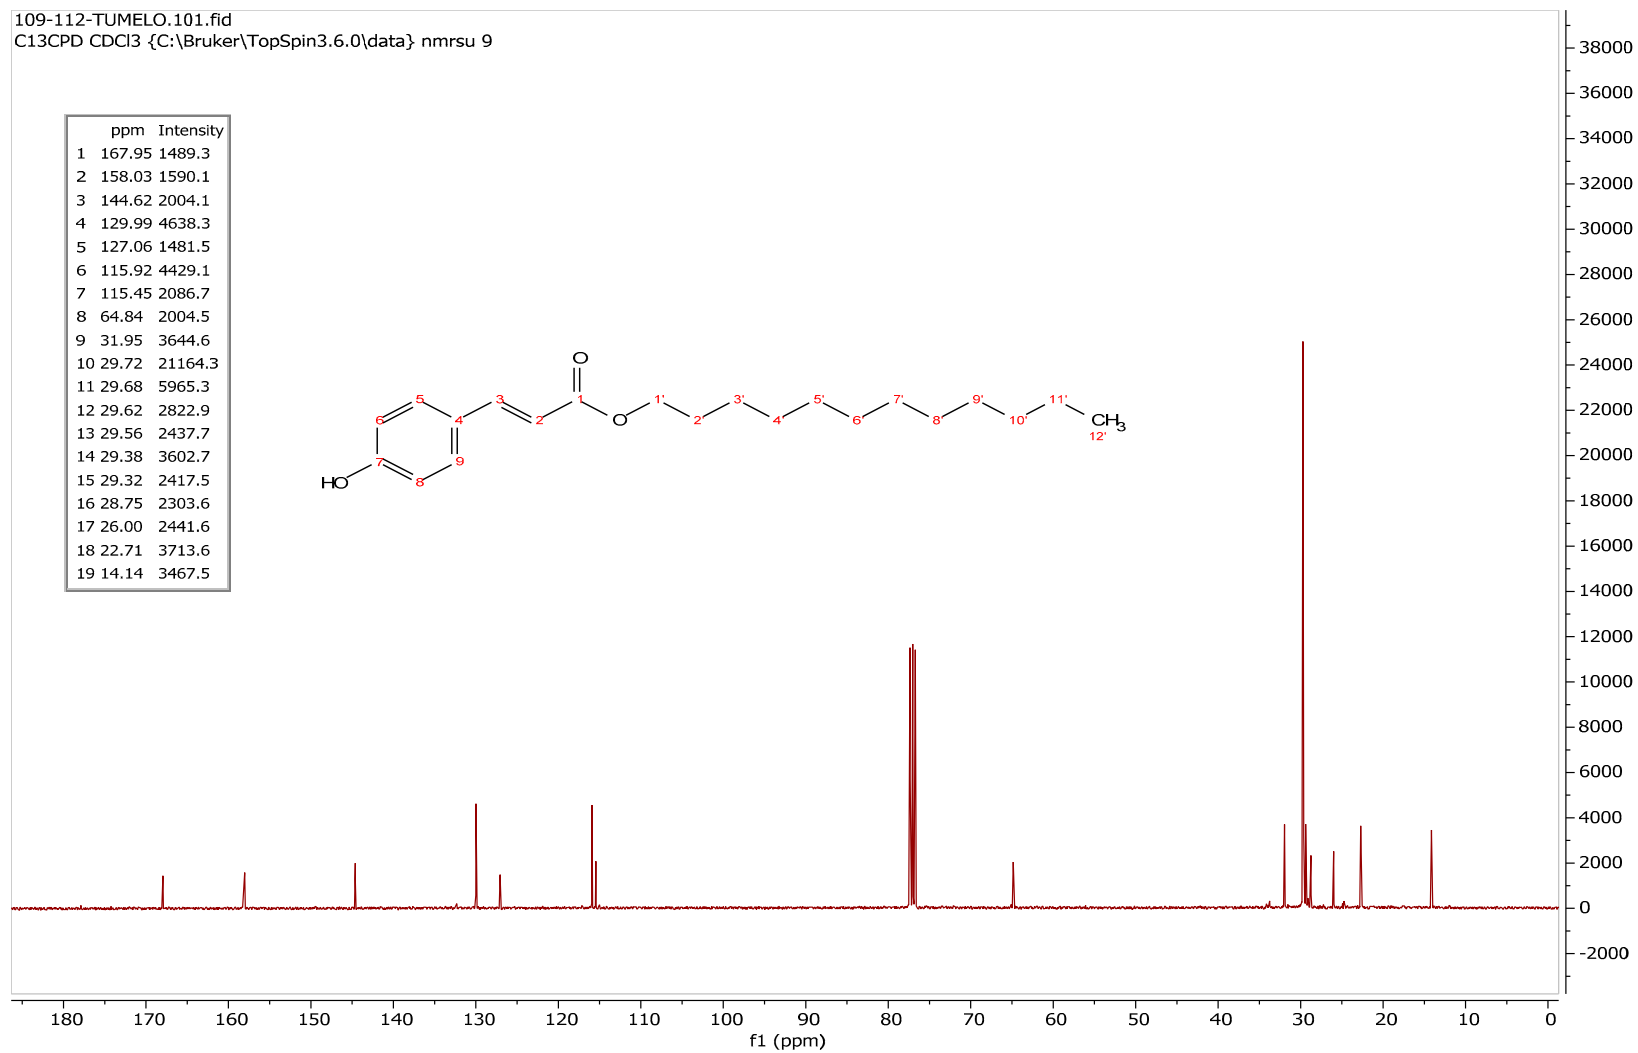

Figure SC.22: Carbon-13 Nuclear Magnetic Resonance (<sup>13</sup>C NMR) spectrum of Dodecyl P Coumarate (CDCl<sub>3</sub>, 100 MHz)

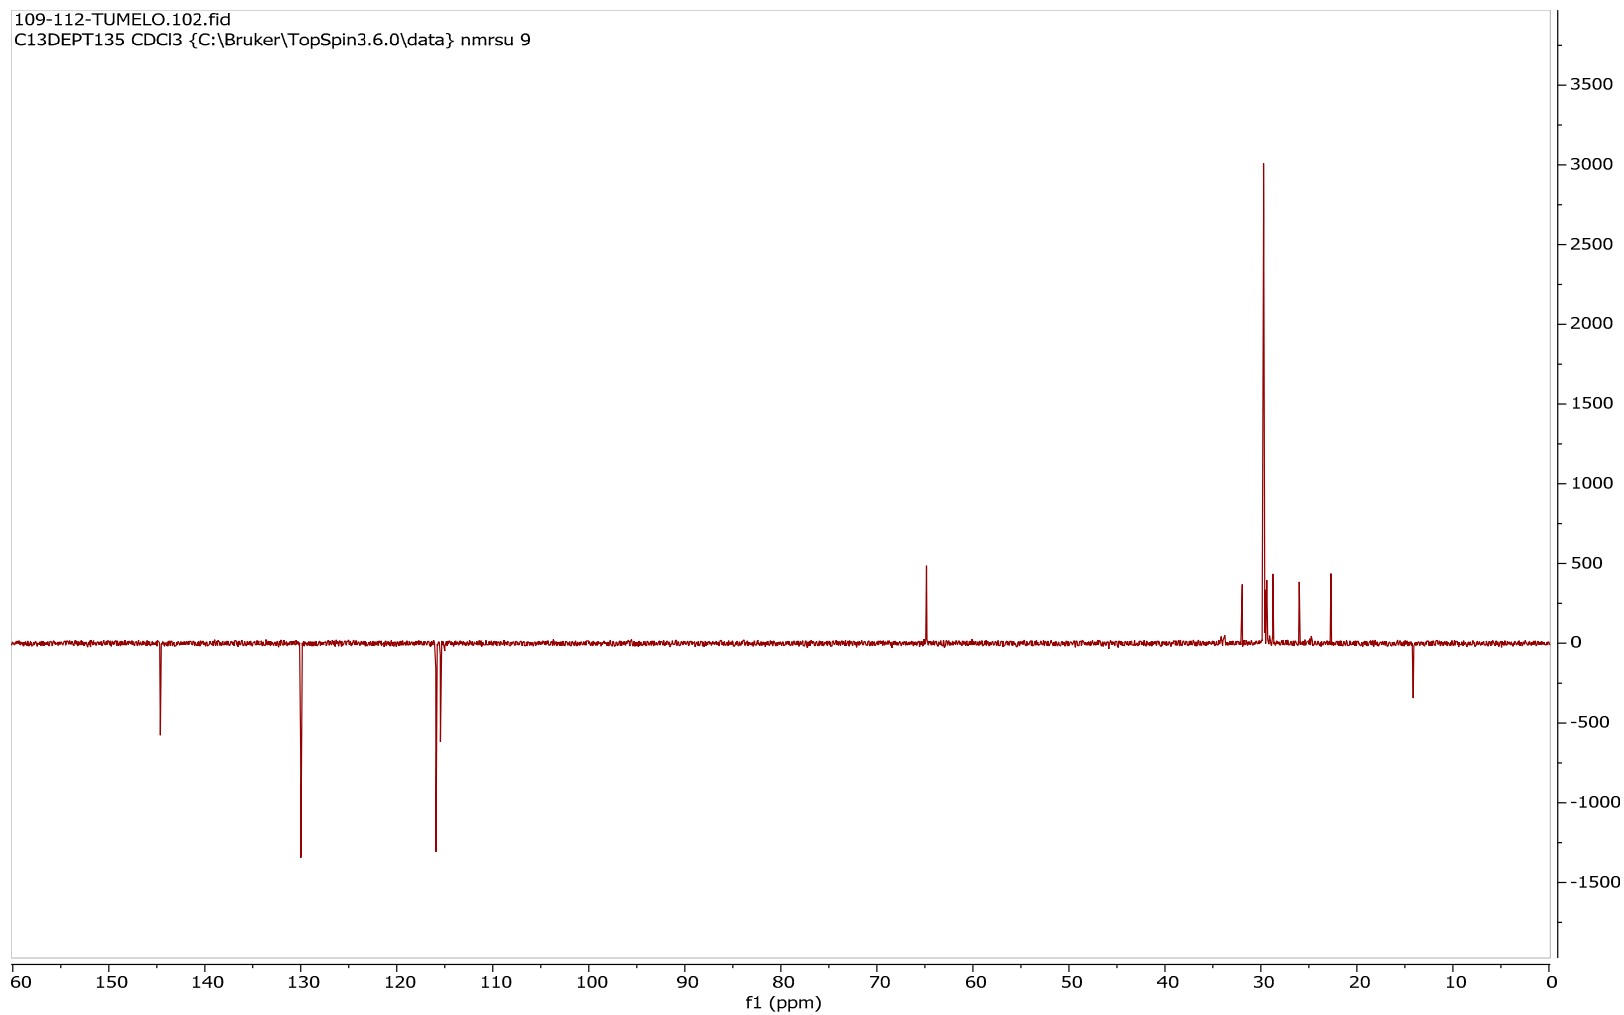

Figure SC.23: Distortionless Enhancement by Polarization Transfer (DEPT) NMR spectra of Dodecyl P Coumarate (CDCl<sub>3</sub>, 100 MHz)



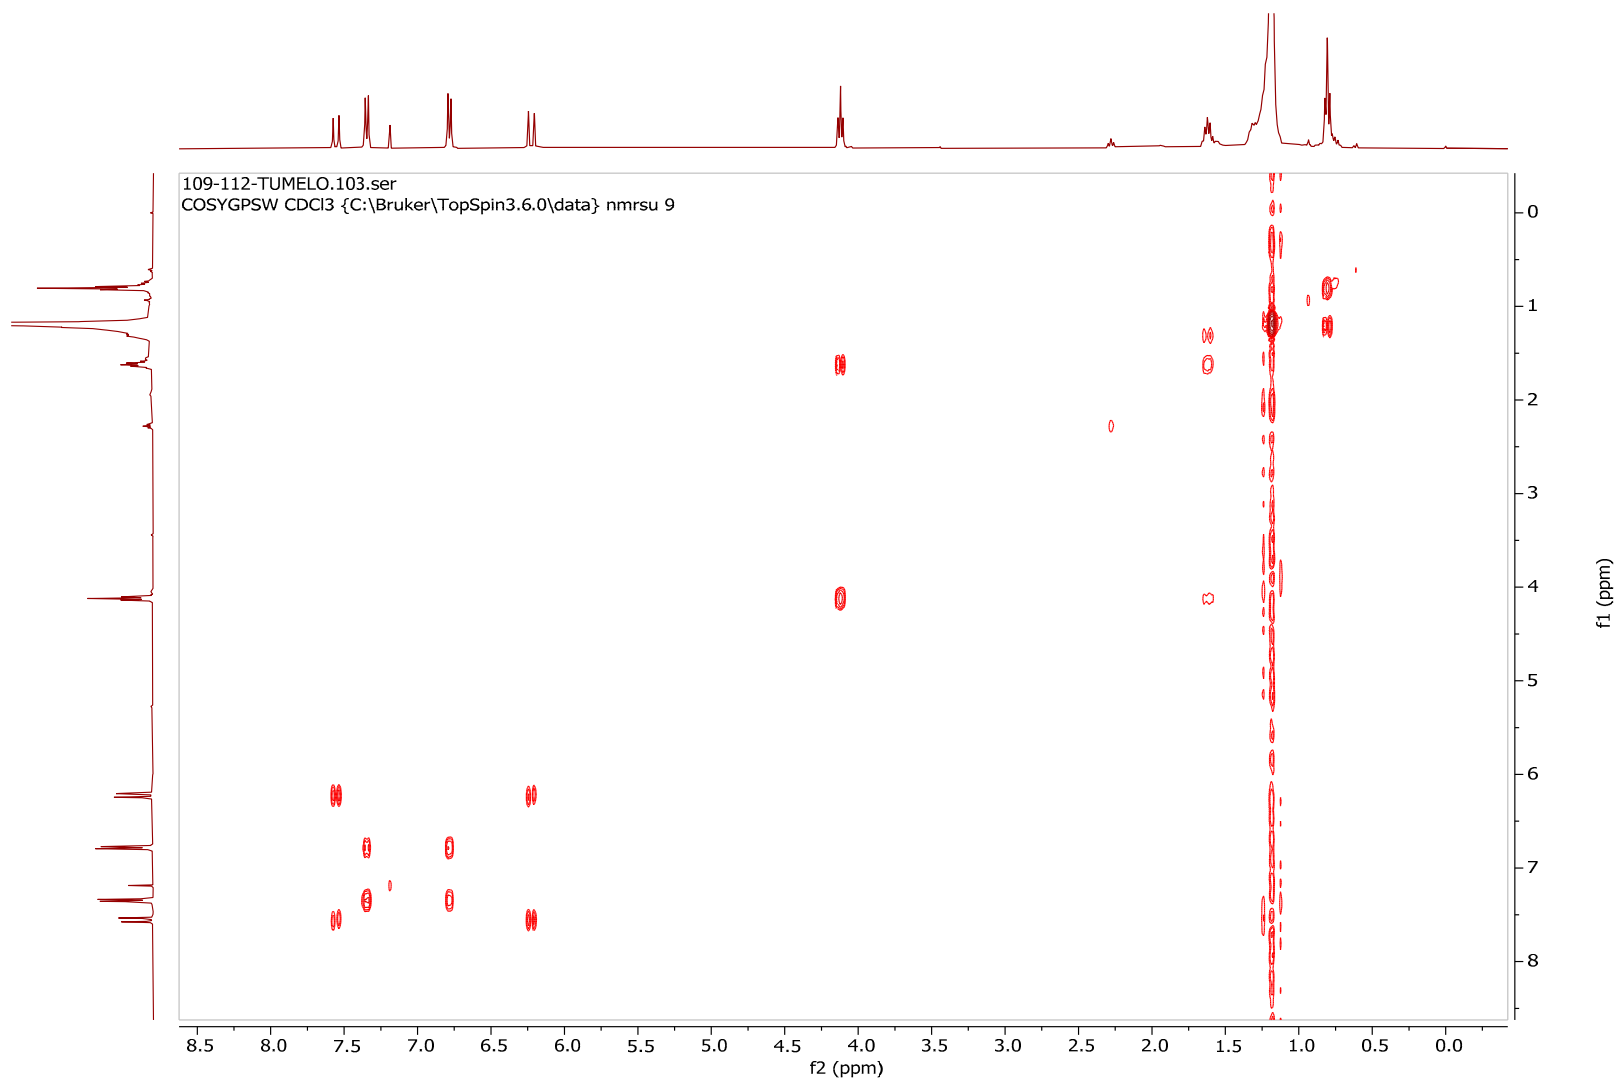

Figure SC.24: Gradient Correlated (gCOSY) spectrum of Dodecyl P Coumarate

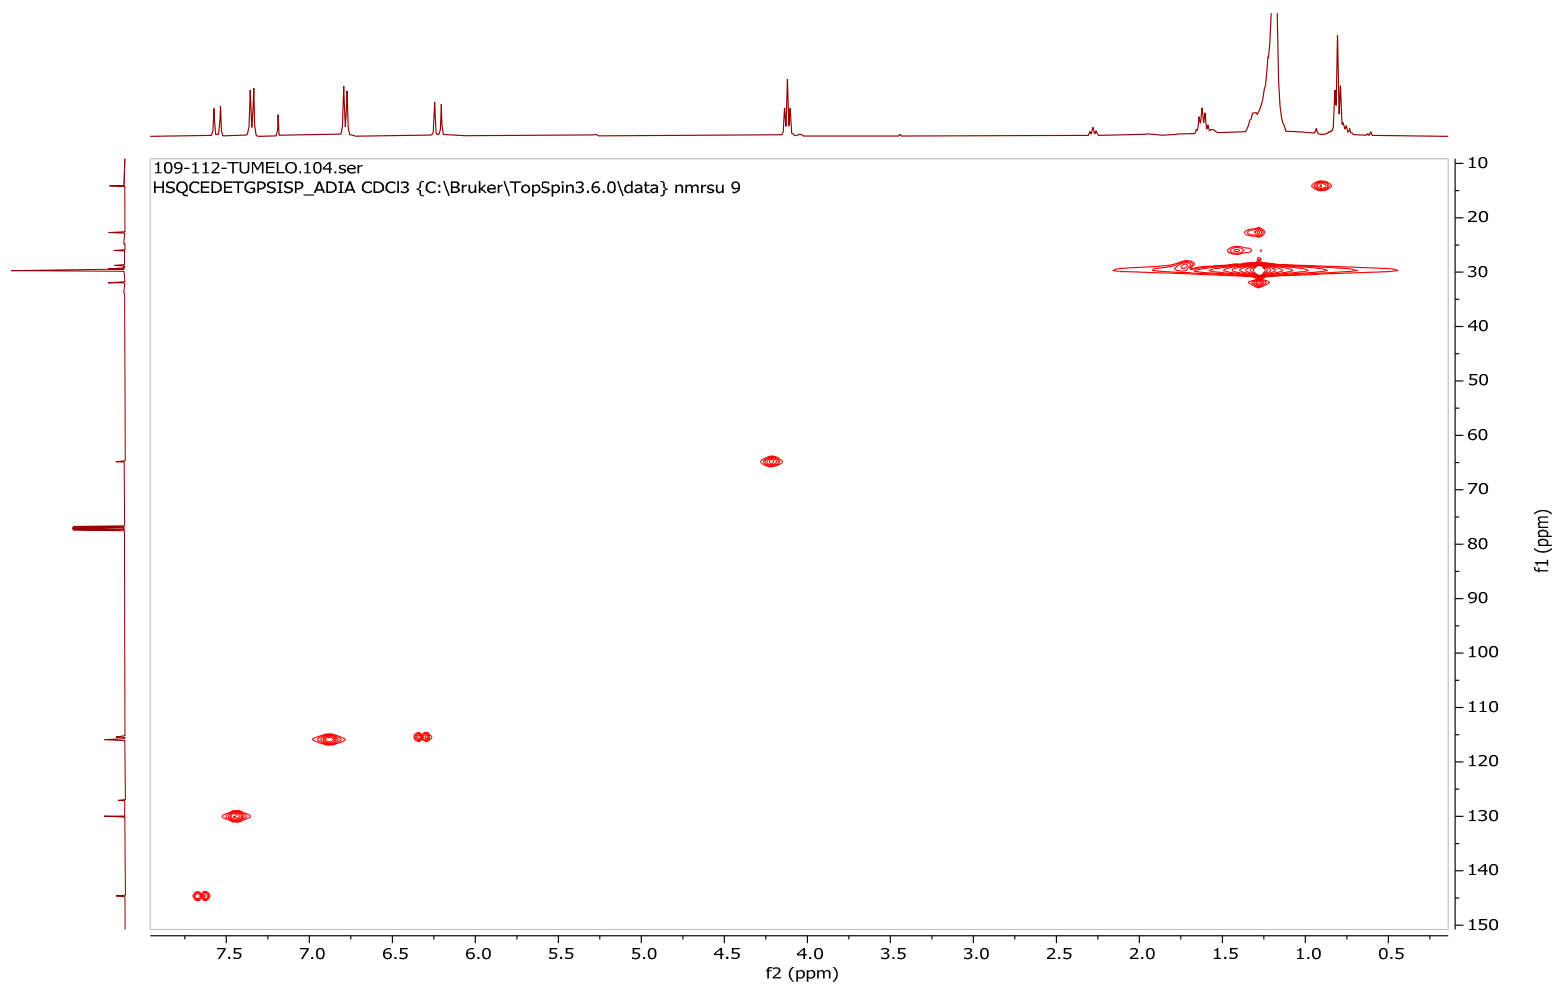

Figure SC.25: Gradient Heteronuclear Single Quantum Coherence (gHSQC) spectrum of Dodecyl P Coumarate

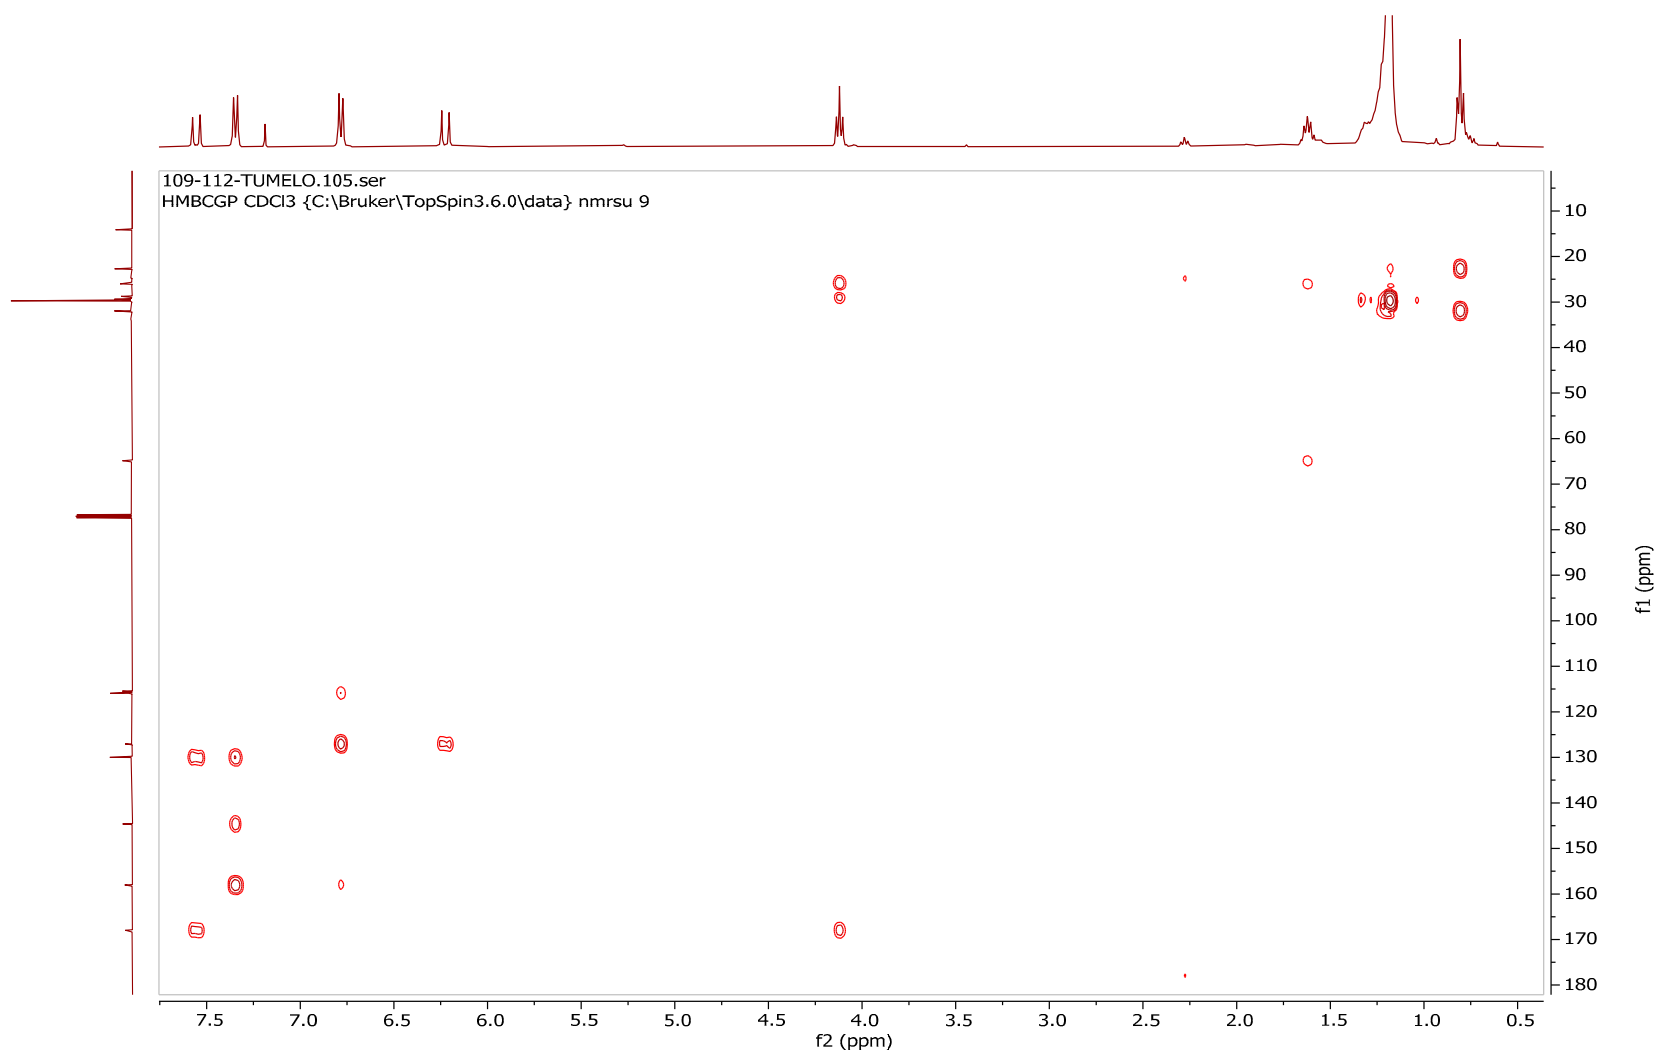

Figure SC.26: Gradient Heteronuclear Multiple Bond Quantum Coherence (gHMBC) spectrum of Dodecyl P Coumarate

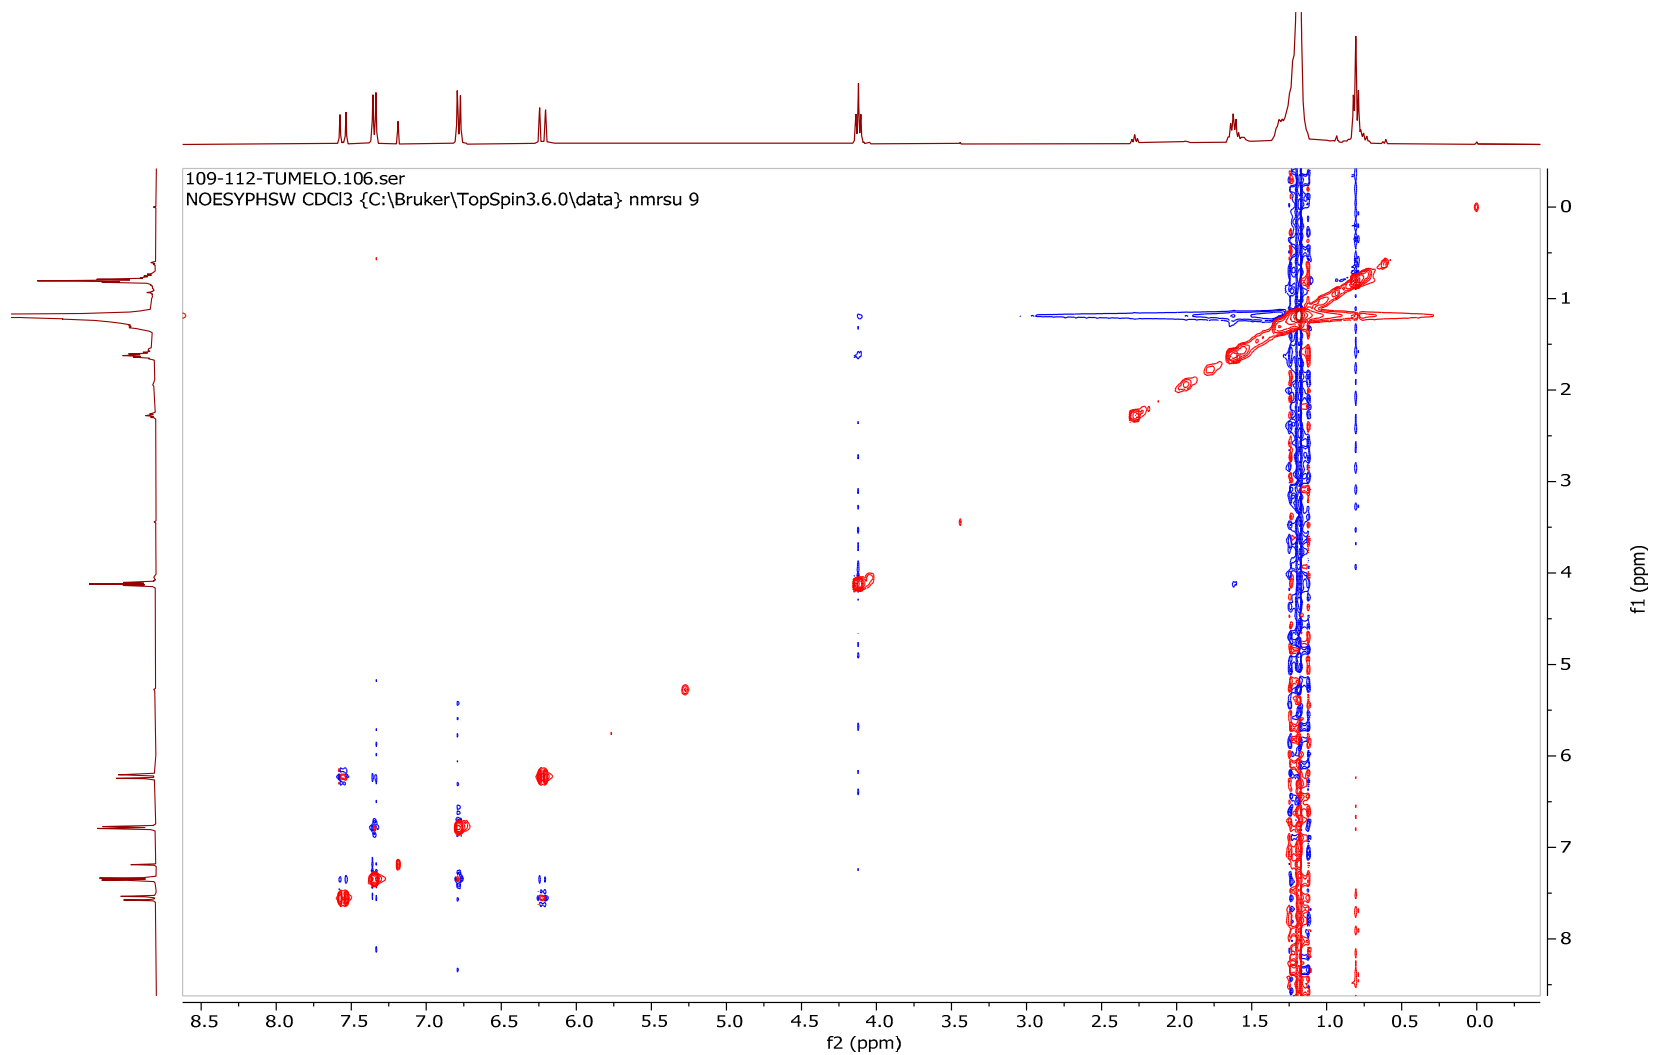

Figure SC.27: Nuclear Overhauser Effect Spectroscopy (NOESY) spectrum of Dodecyl P Coumarate

#### 4. Spectral data of Compound D

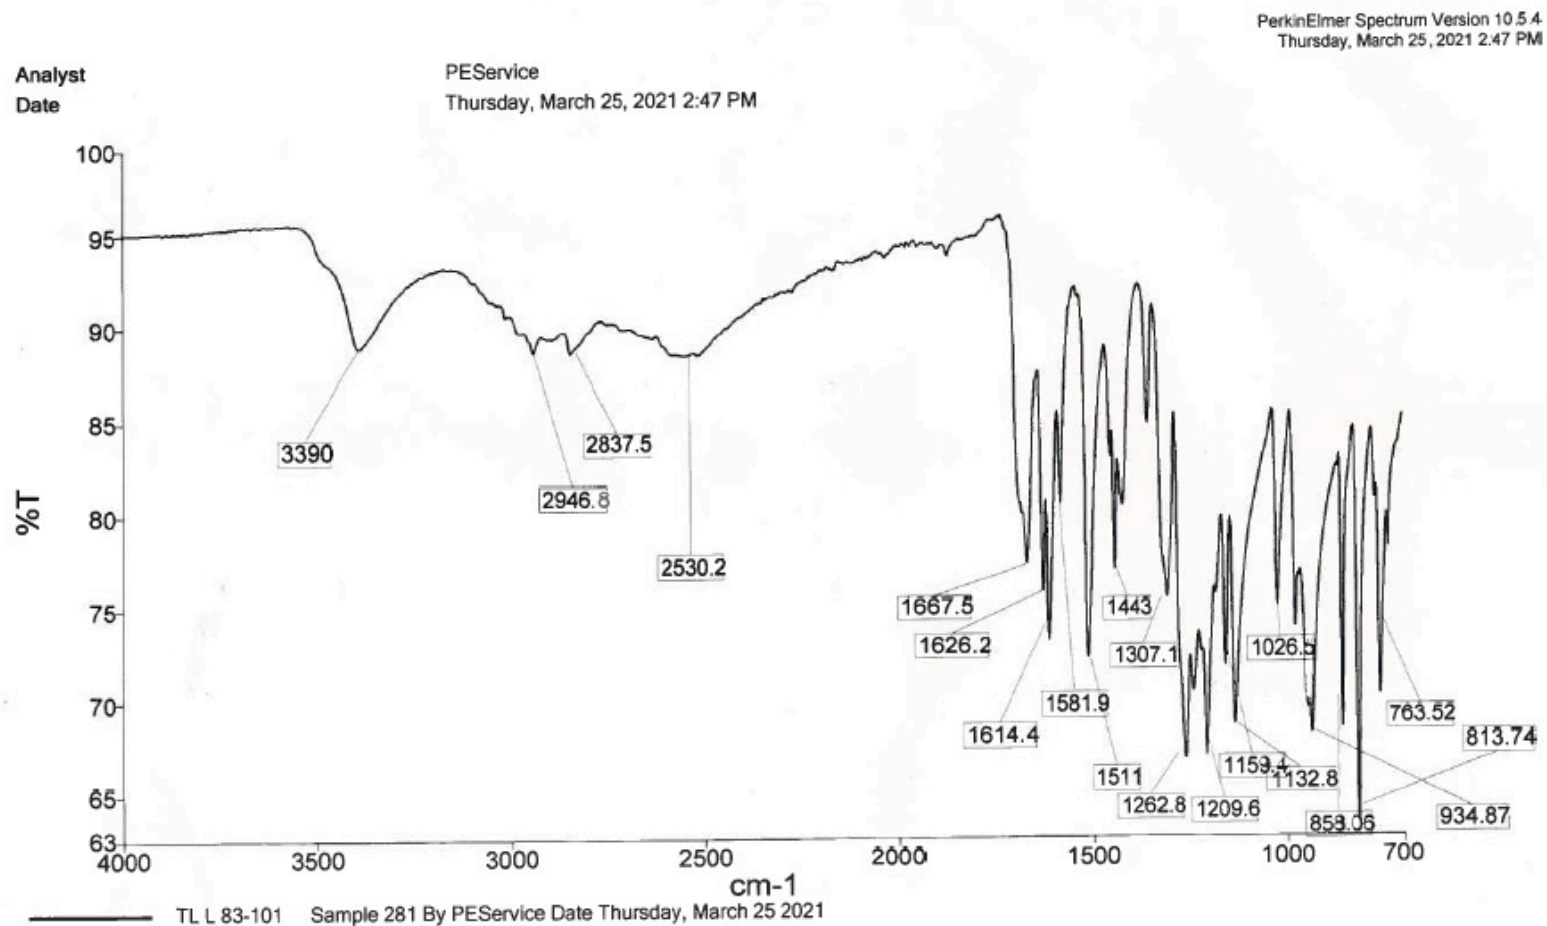

Figure SD.28: Fourier-Transform Infrared Spectroscopy (FTIR) spectrum of Ferulic acid [(*E*)-3-(4-hydroxy-3-methoxyphenyl) prop-2-enoic acid]

TLD\_BD1\_01\_9398.mzXML#1713 @2.55 MS1 c +, base peak: 193.0501 m/z (3.6E4)

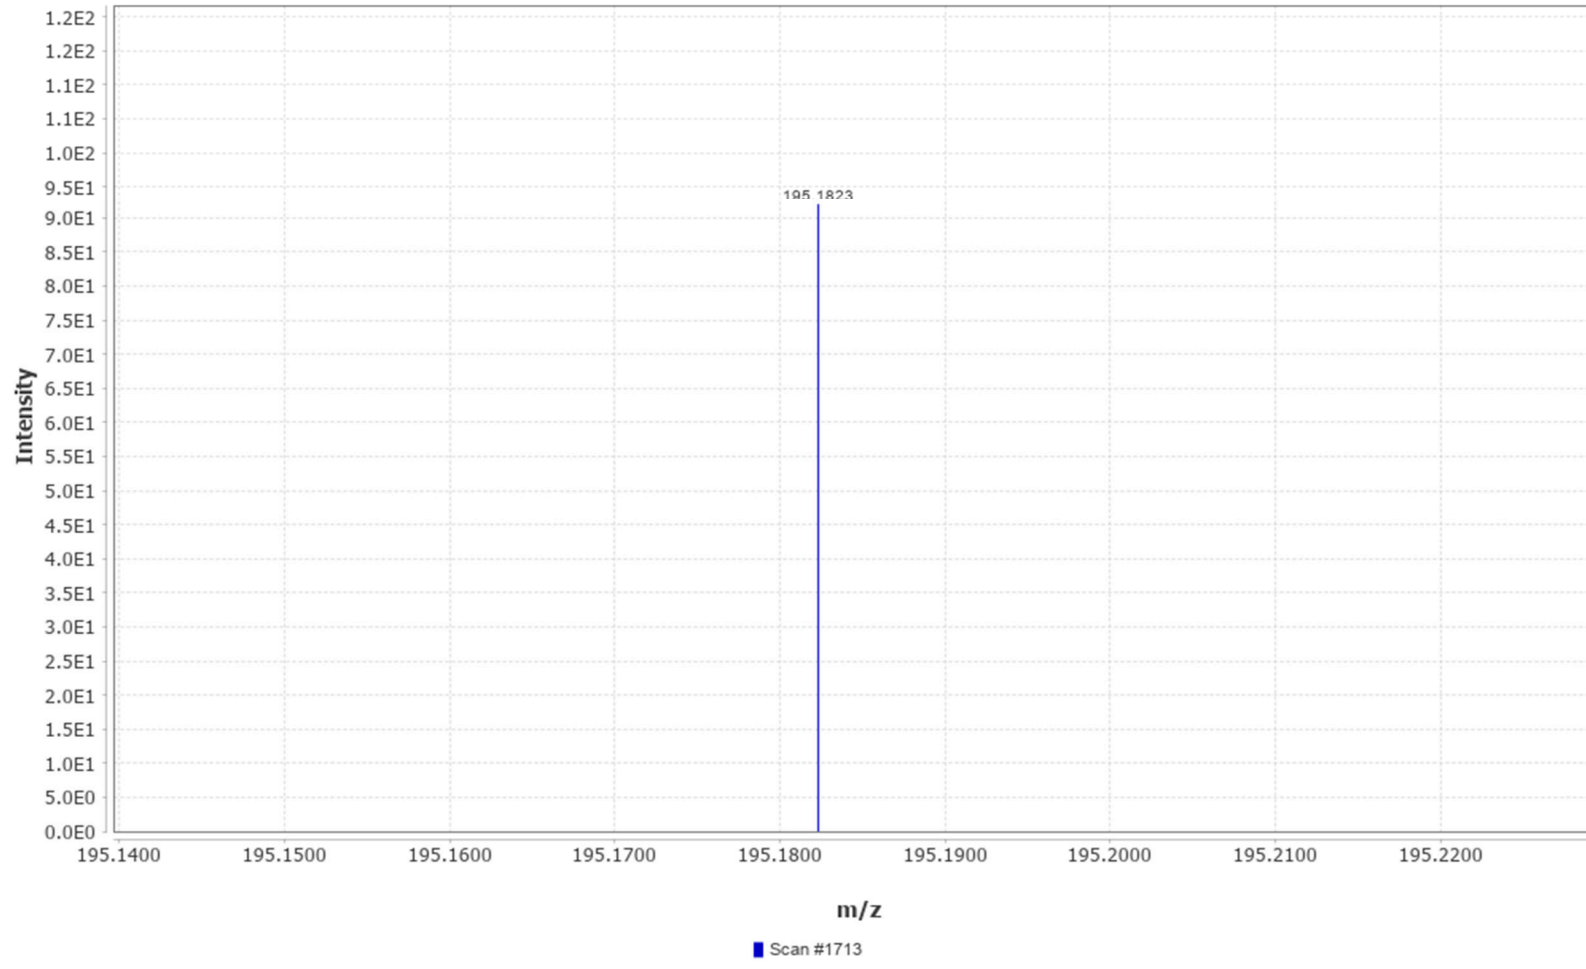

Figure SD.29: High-Resolution Electrospray Ionization Mass spectrum (HR-ESI-MS) of Ferulic Acid [M+H]<sup>+</sup> m/z = 195.1823

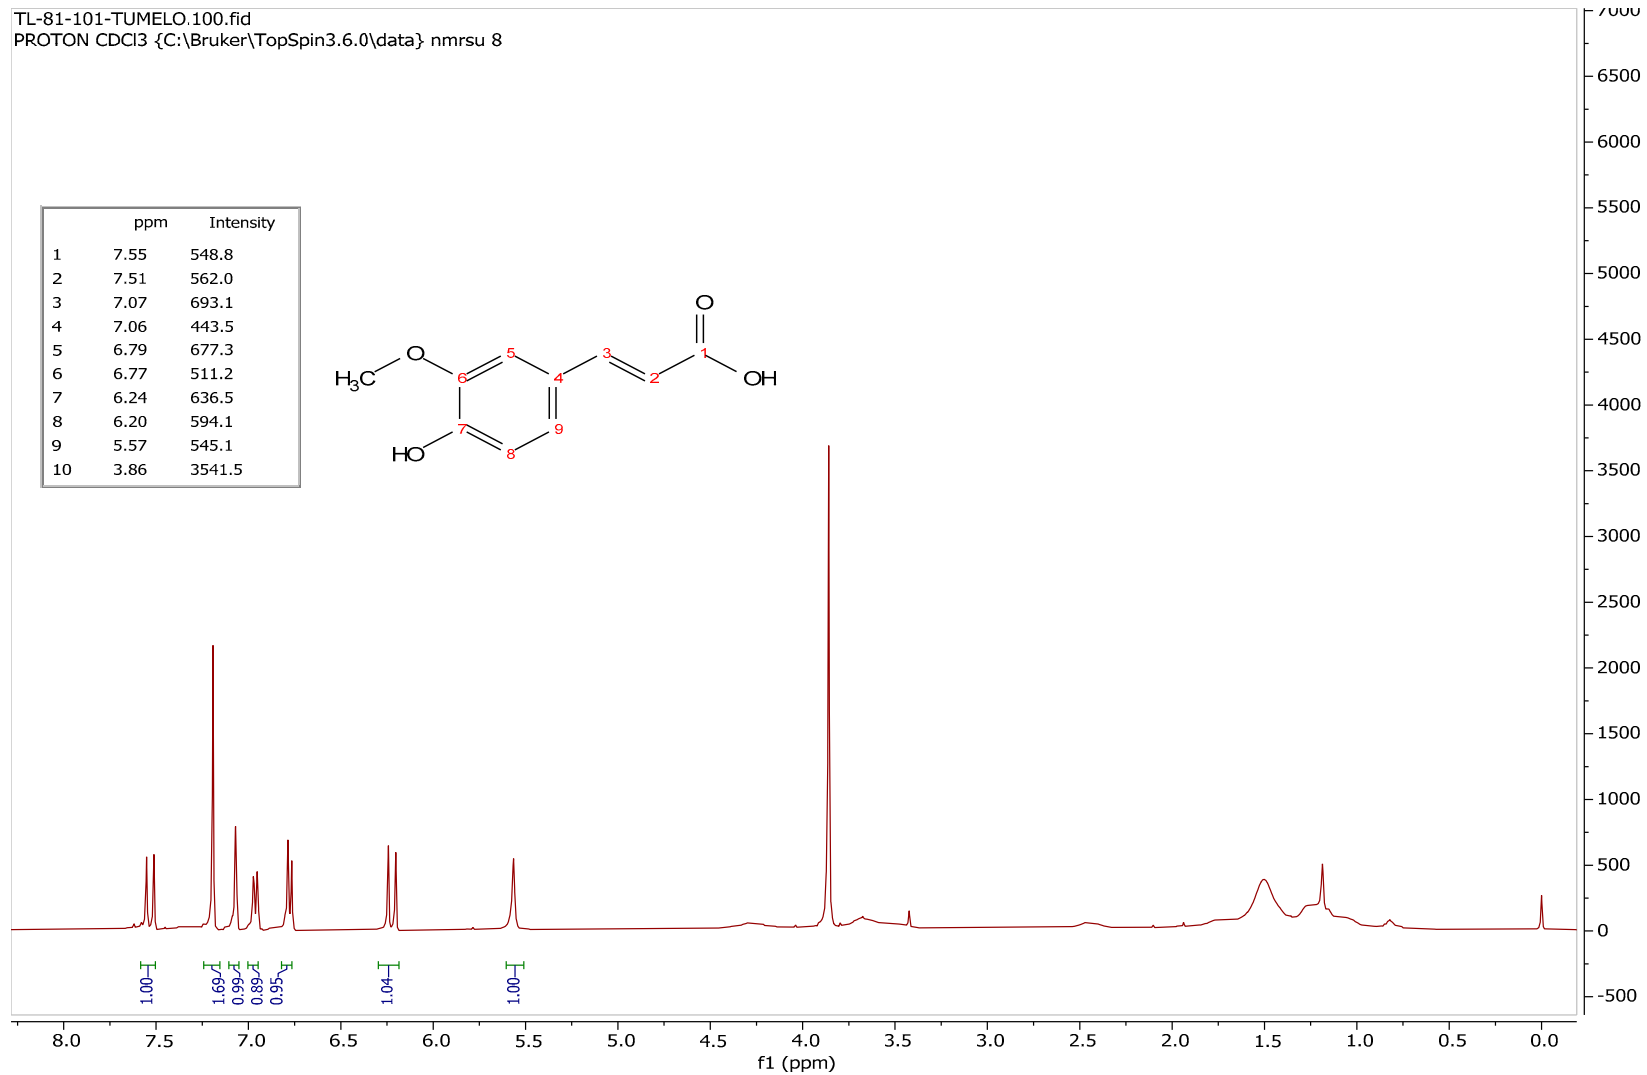

Figure SD.30: Proton Nuclear Magnetic Resonance (<sup>1</sup>H NMR) spectrum of Ferulic Acid (CDCl<sub>3</sub>, 400 MHz)

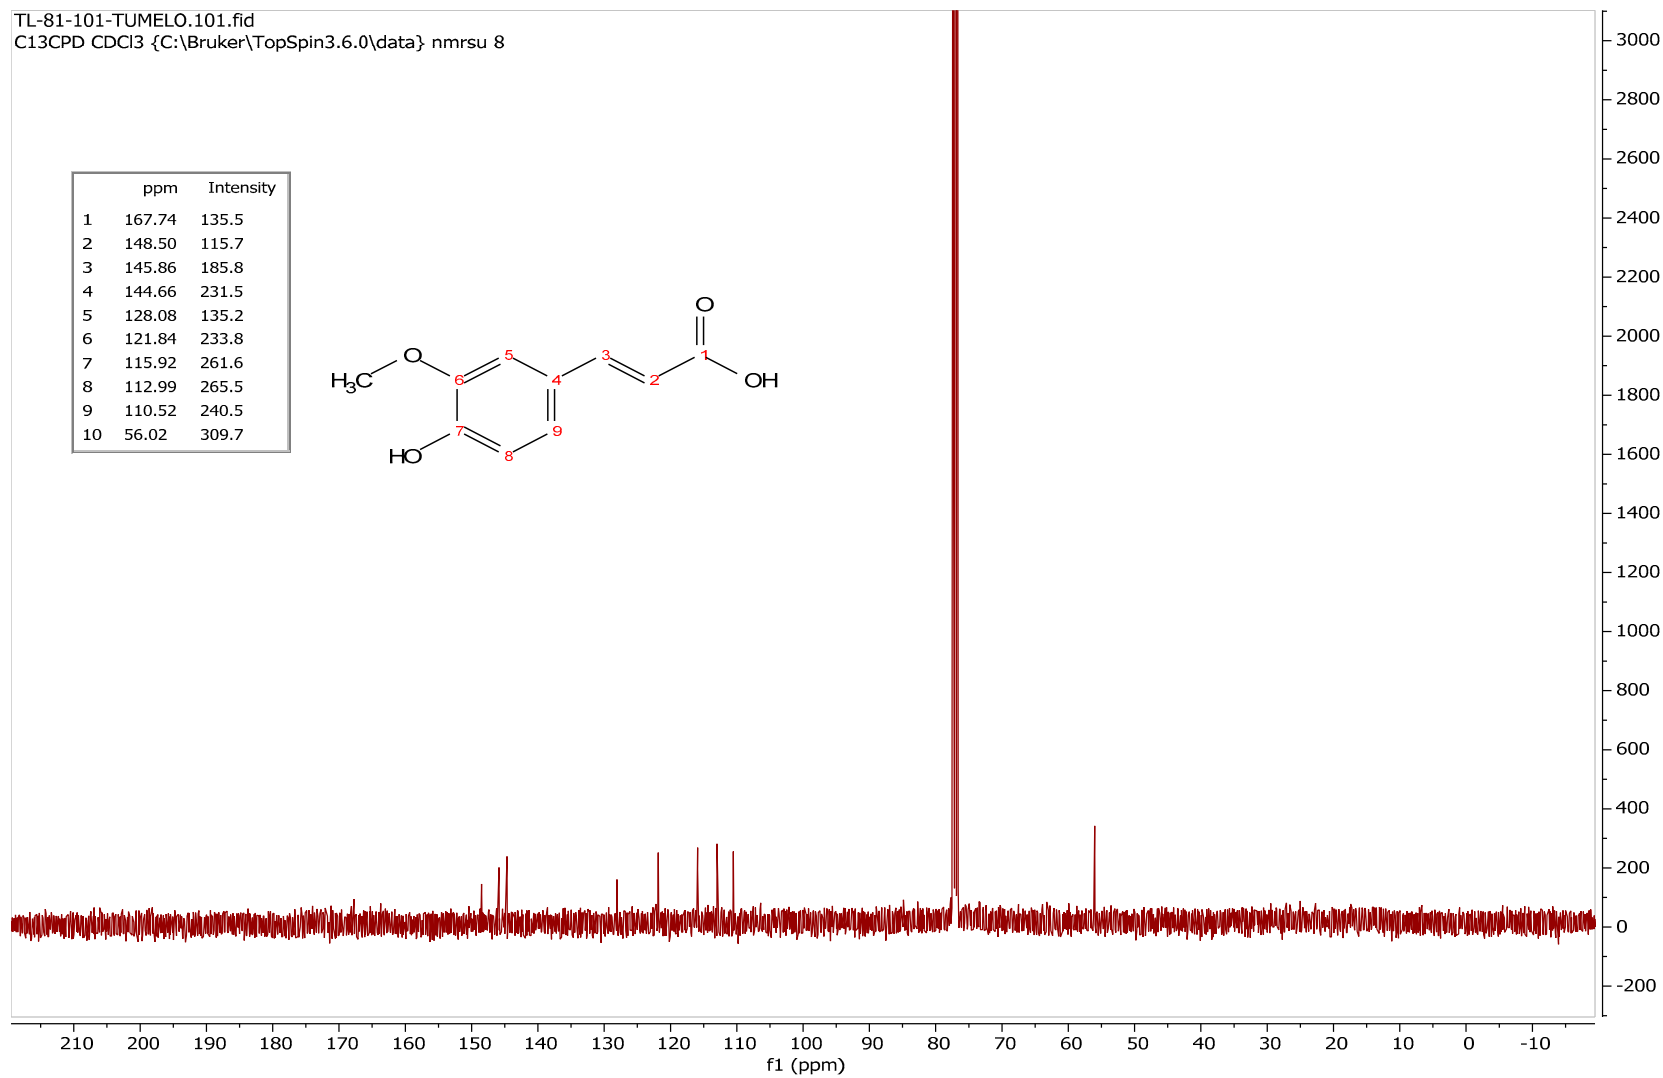

Figure SD.31: Carbon-13 Nuclear Magnetic Resonance ( $^{13}\text{C}$  NMR) spectrum of Dodecyl P Coumarate ( $\text{CDCl}_3$ , 100 MHz)



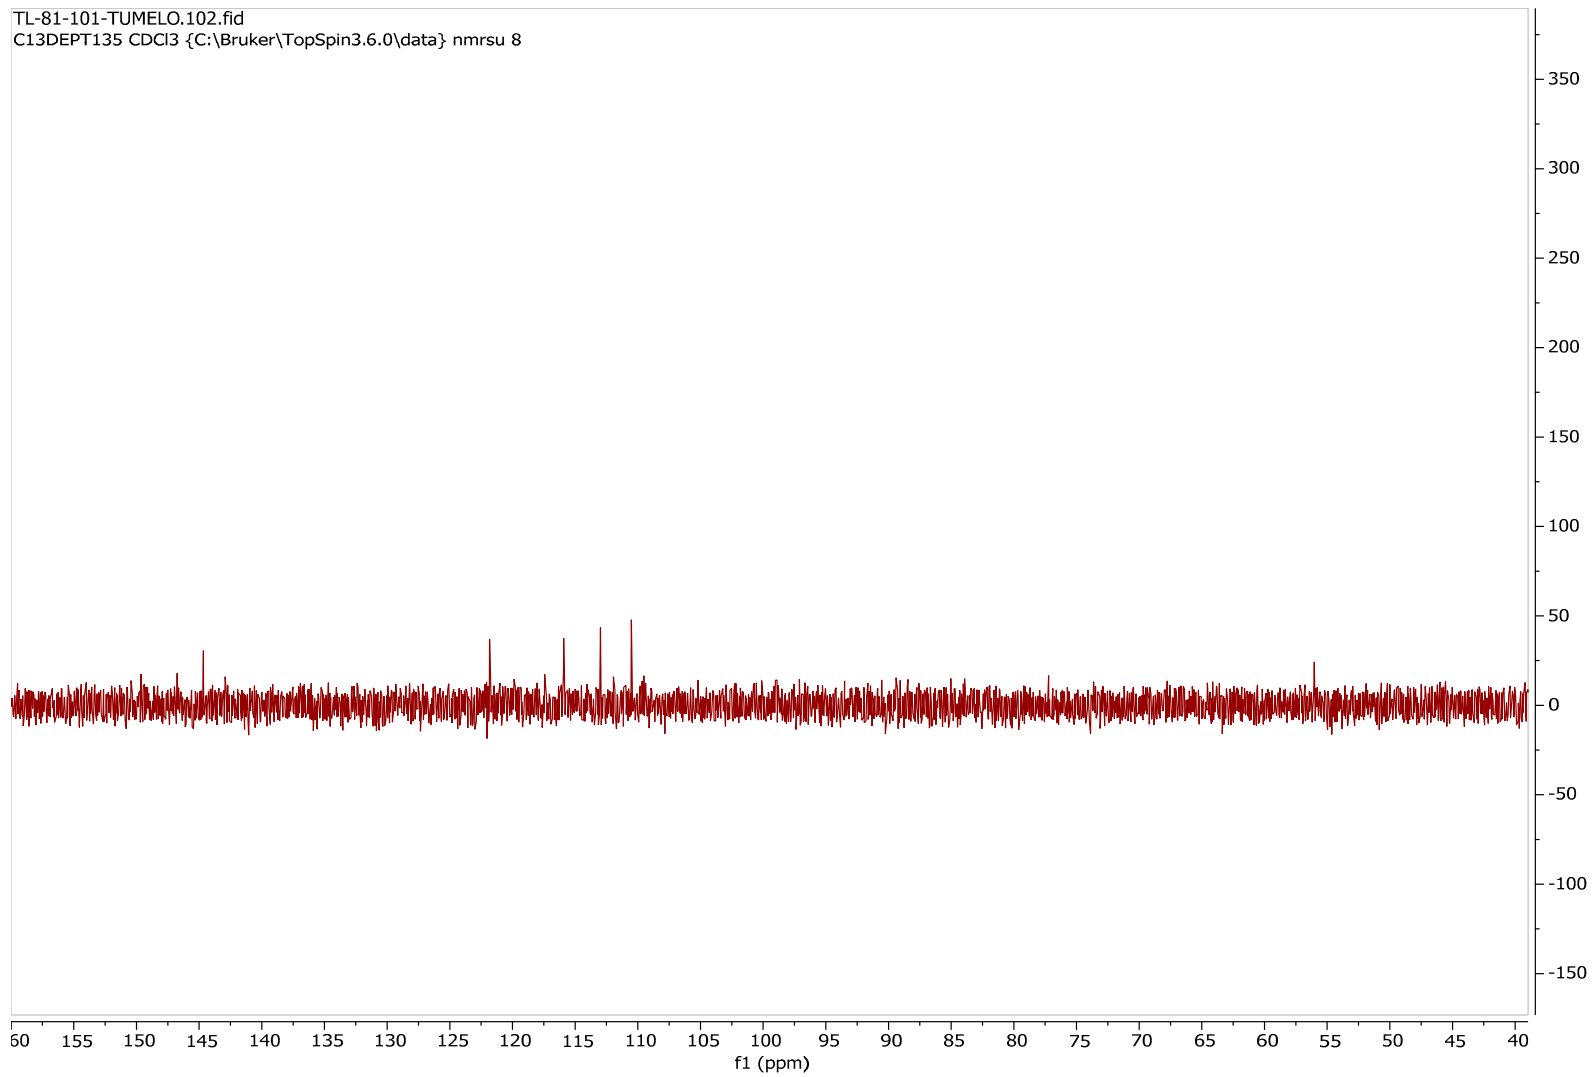

**Figure SD.32: Distortionless Enhancement by Polarization Transfer (DEPT) NMR spectra of Ferulic Acid (CDCl<sub>3</sub>, 100 MHz)**

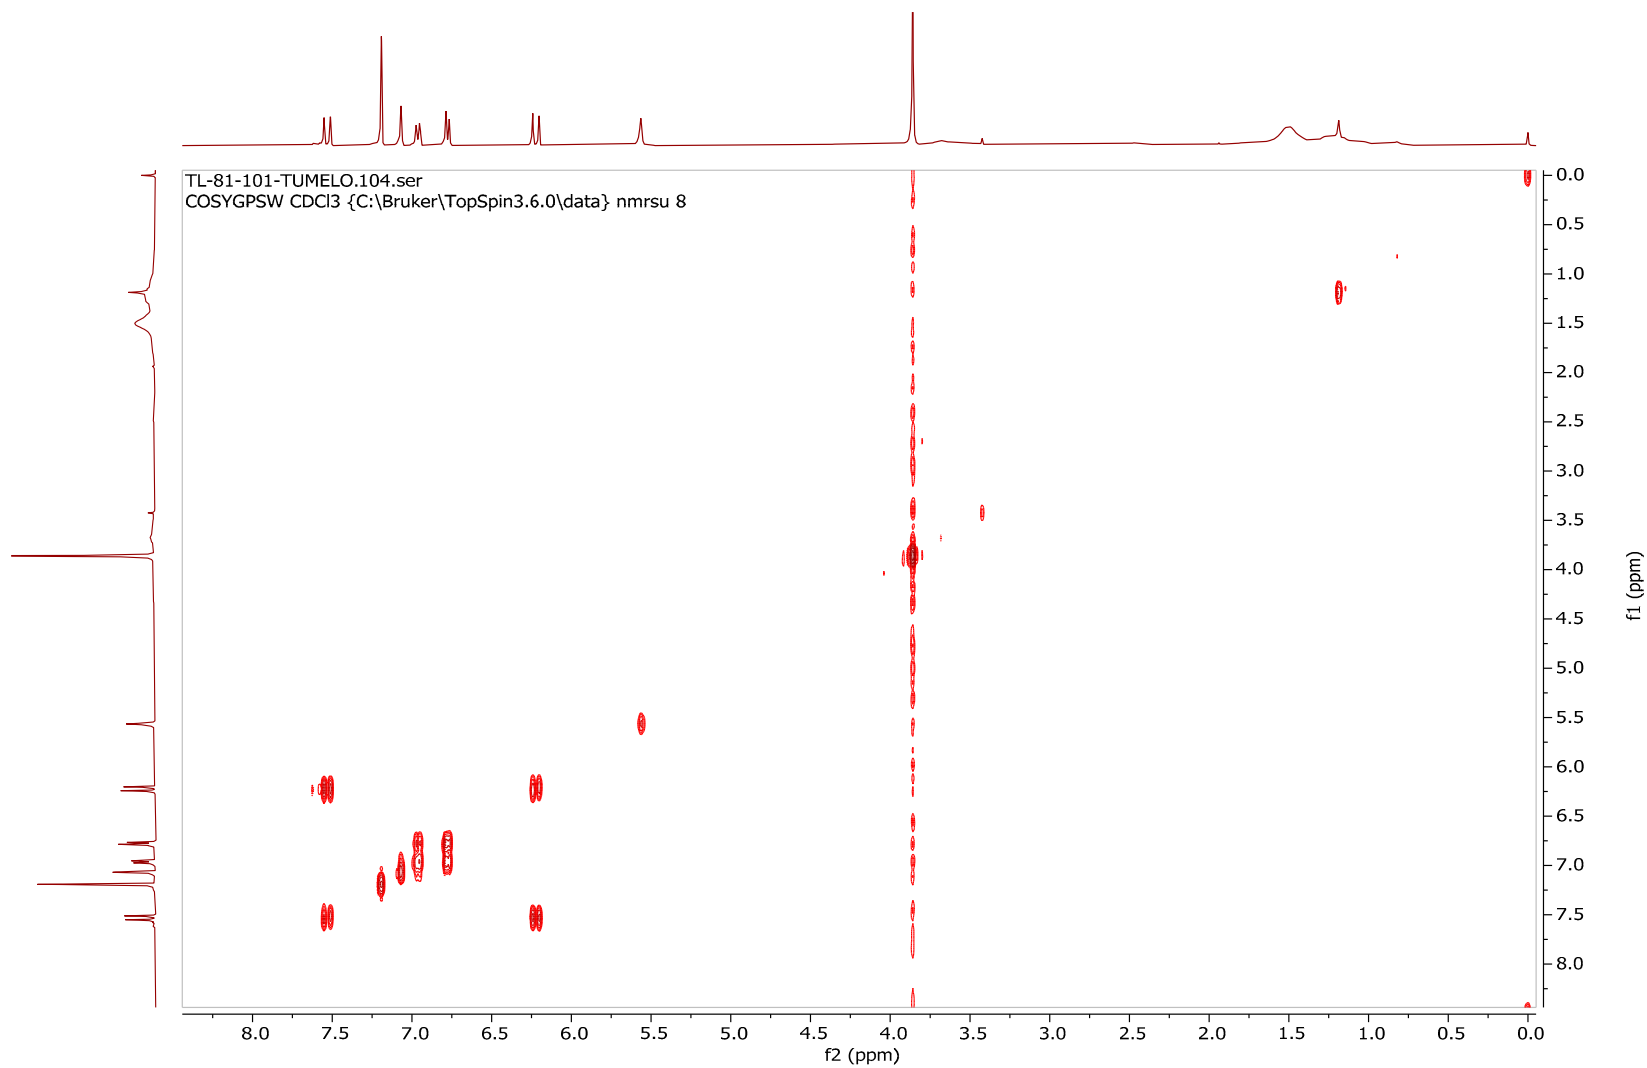

Figure SD.33: Gradient Correlated (gCOSY) spectrum of Ferulic Acid

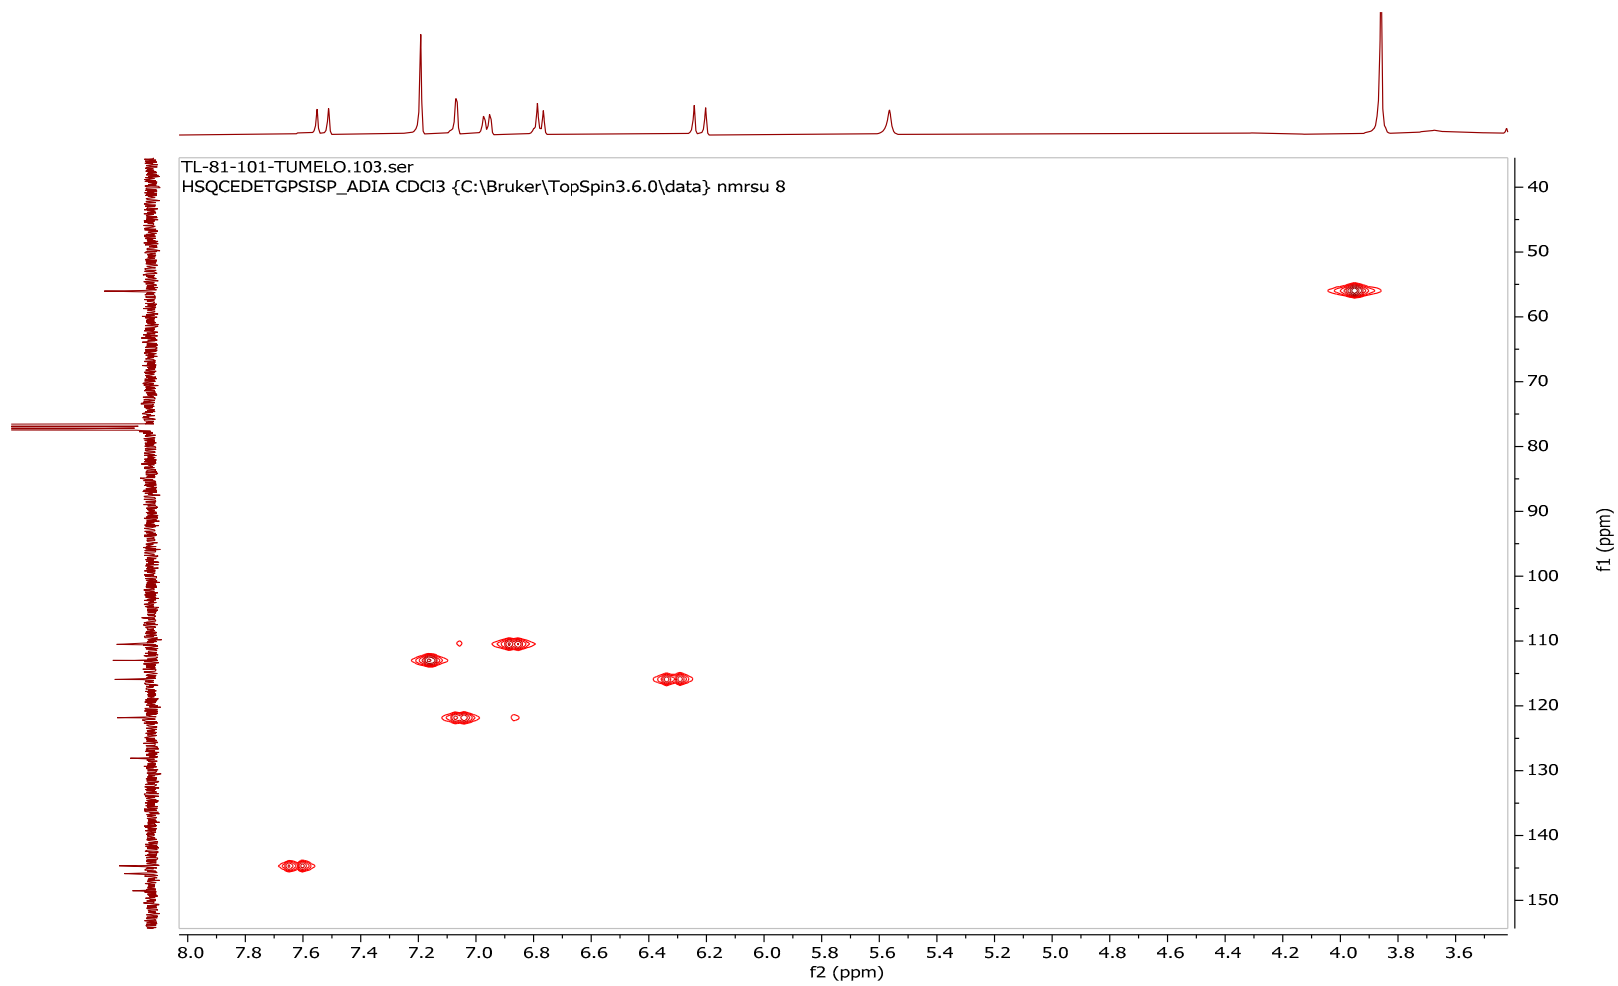

Figure SD.34: Gradient Heteronuclear Single Quantum Coherence (gHSQC) spectrum of Ferulic Acid

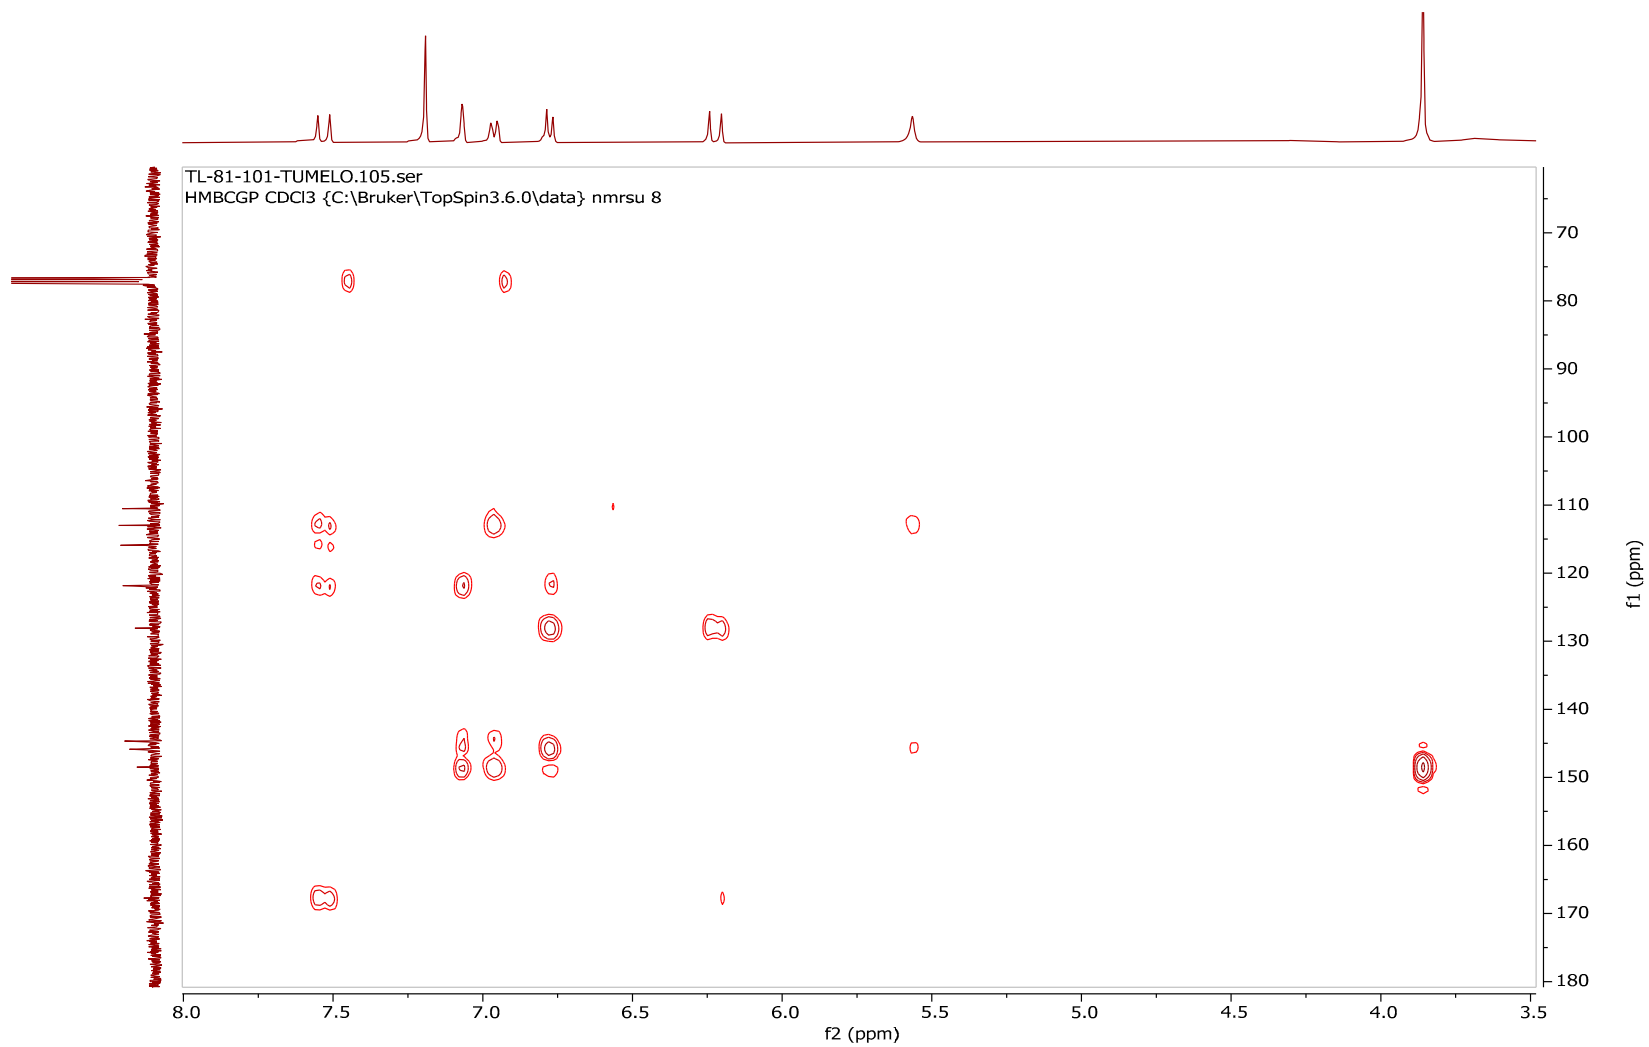

Figure SD.35: Gradient Heteronuclear Multiple Bond Quantum Coherence (gHMBC) spectrum of Ferulic Acid

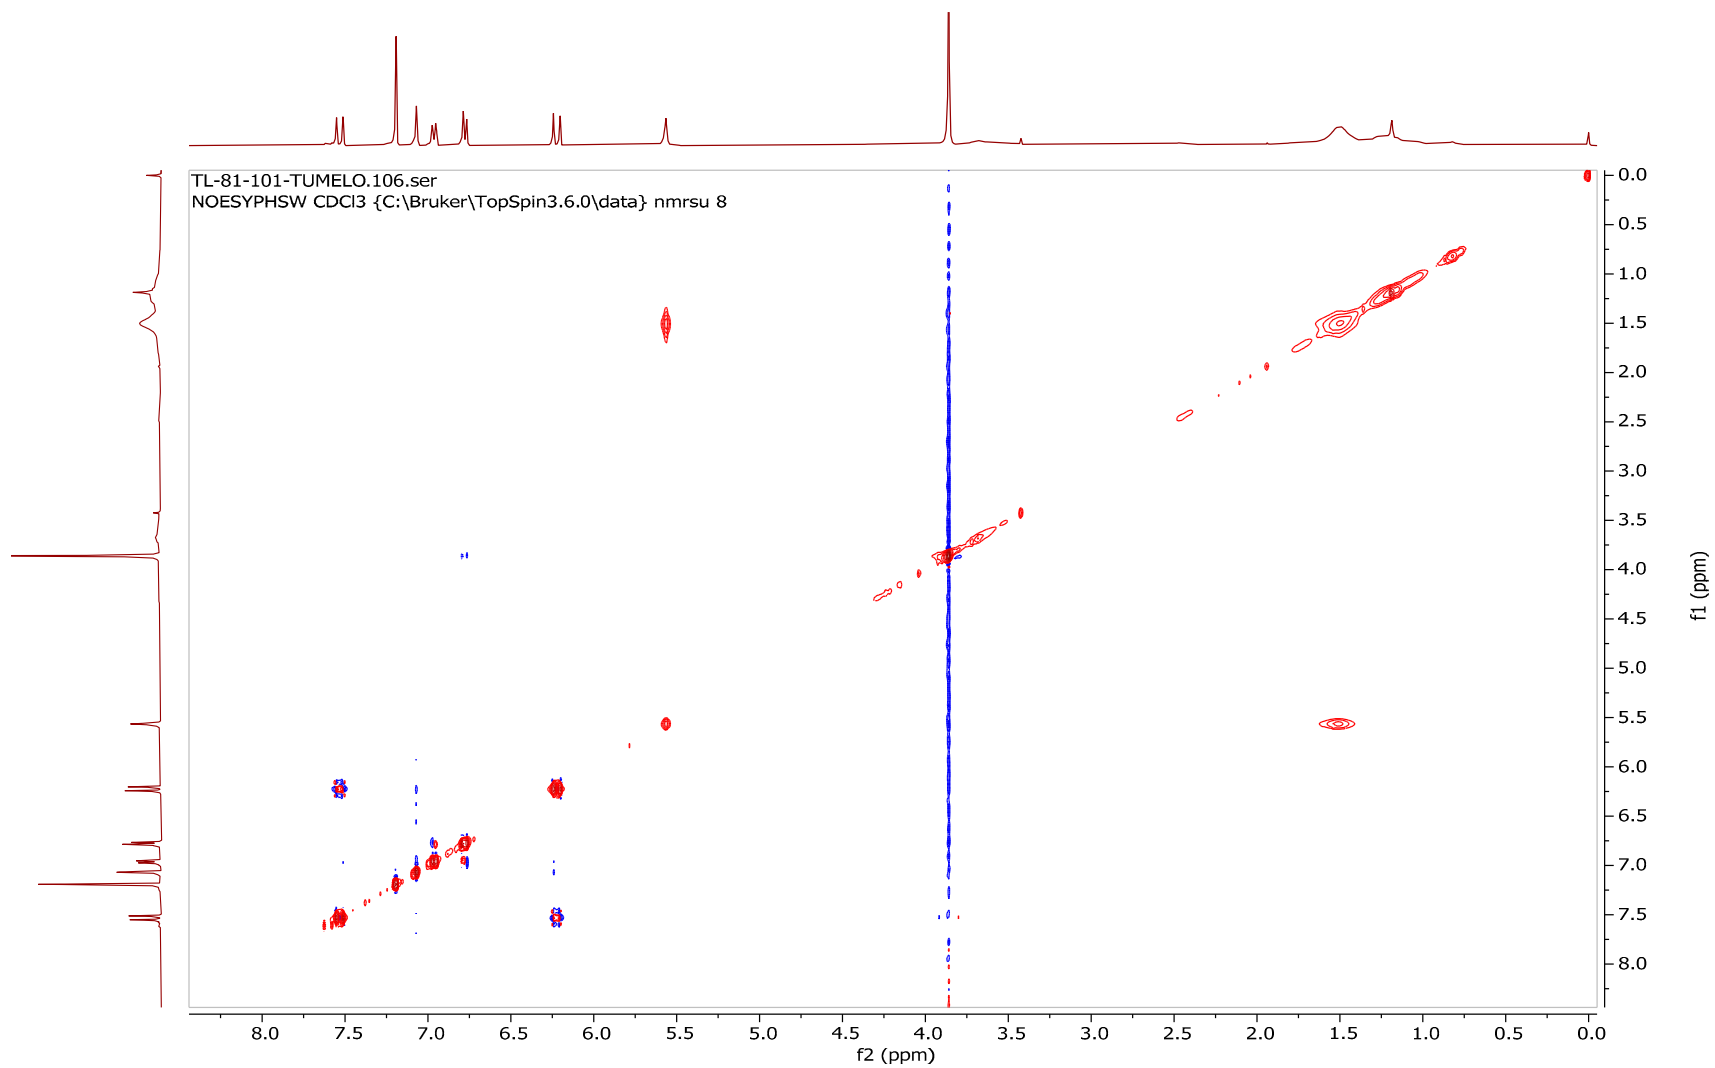

Figure SD.36: Nuclear Overhauser Effect Spectroscopy (NOESY) spectrum of Ferulic Acid

## 5. Spectral data of Compound E

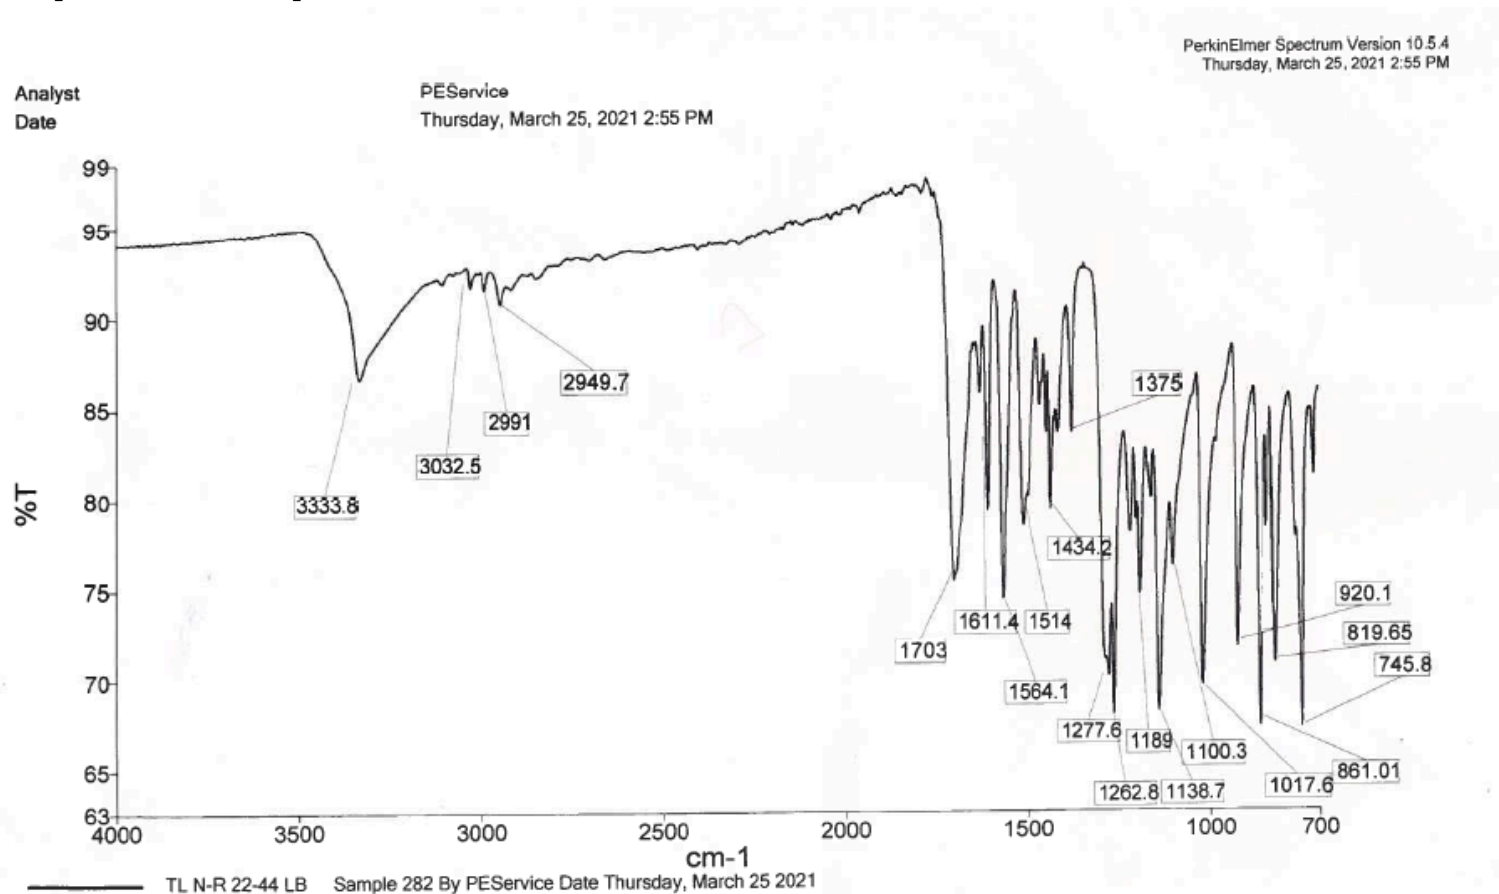

Figure SE.37: Fourier-Transform Infrared Spectroscopy (FTIR) spectrum of Scopoletin [7-hydroxy-6-methoxychromen-2-one]

TLE\_BD2\_01\_9399.mzXML#1801 @2.68 MS1 c +, base peak: 177.0553 m/z (8.7E3)

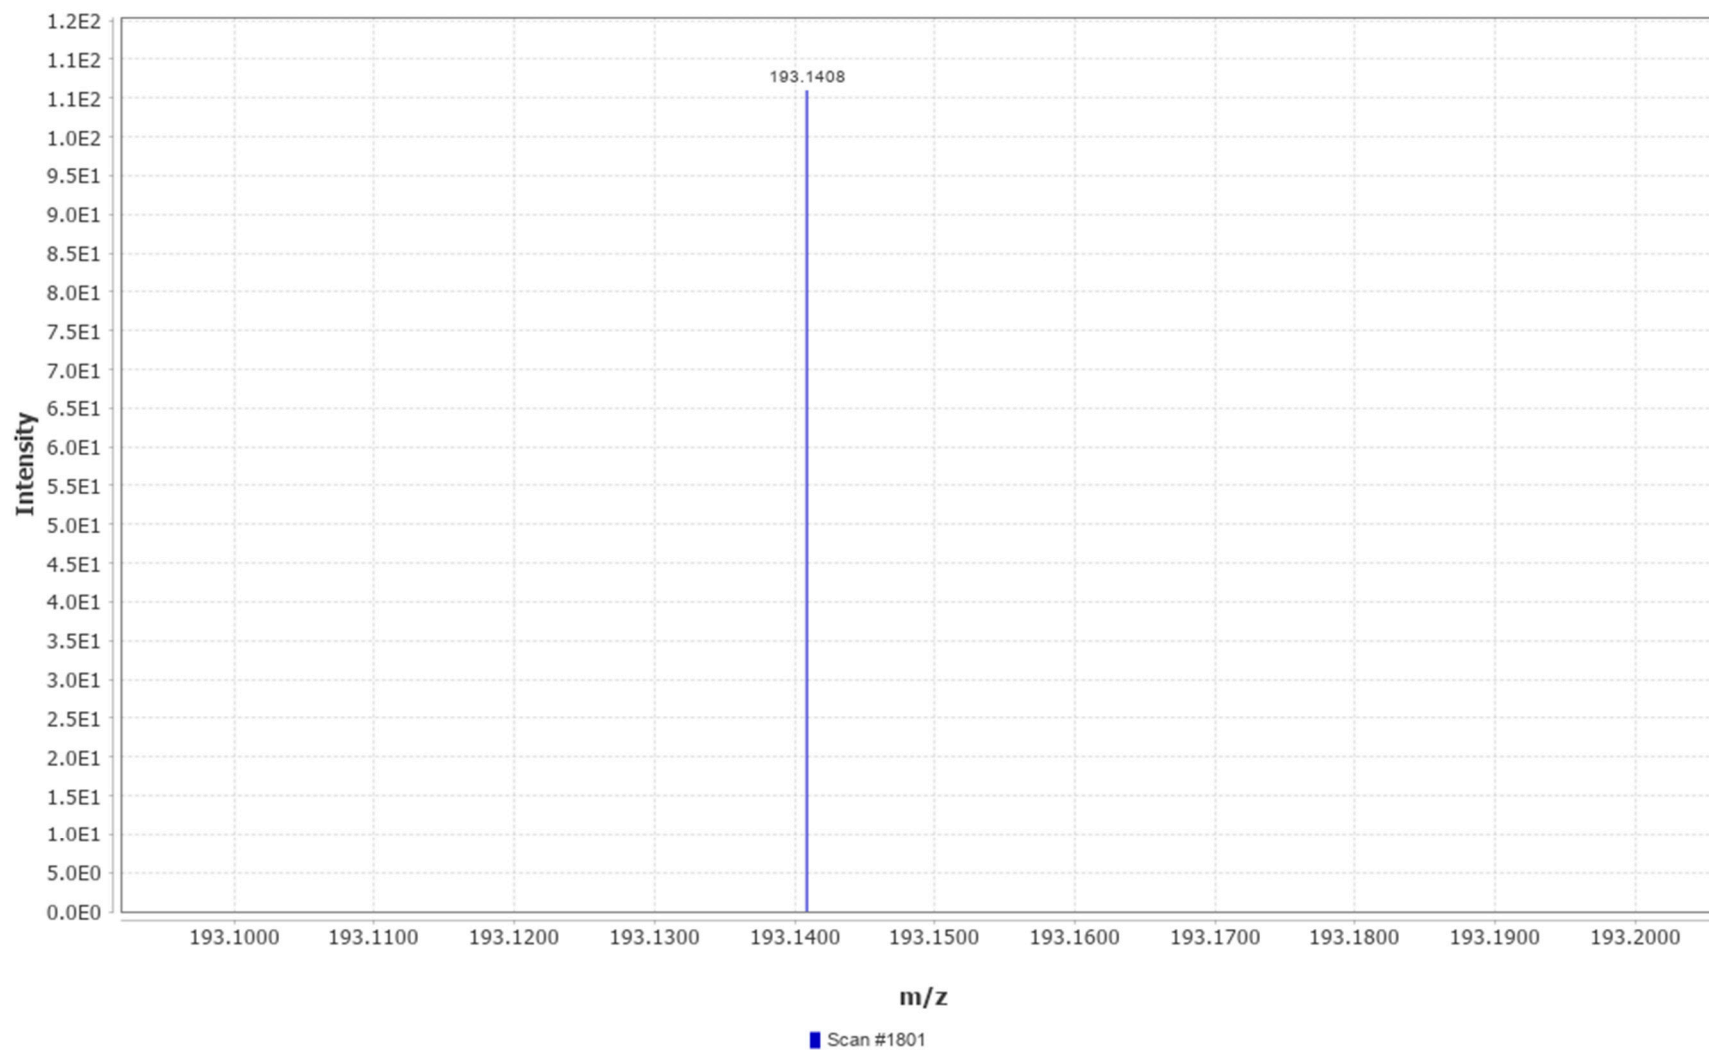

Figure SE.38: High-Resolution Electrospray Ionization Mass spectrum (HR-ESI-MS) of Scopoletin [M+H]<sup>+</sup> m/z = 193.1408

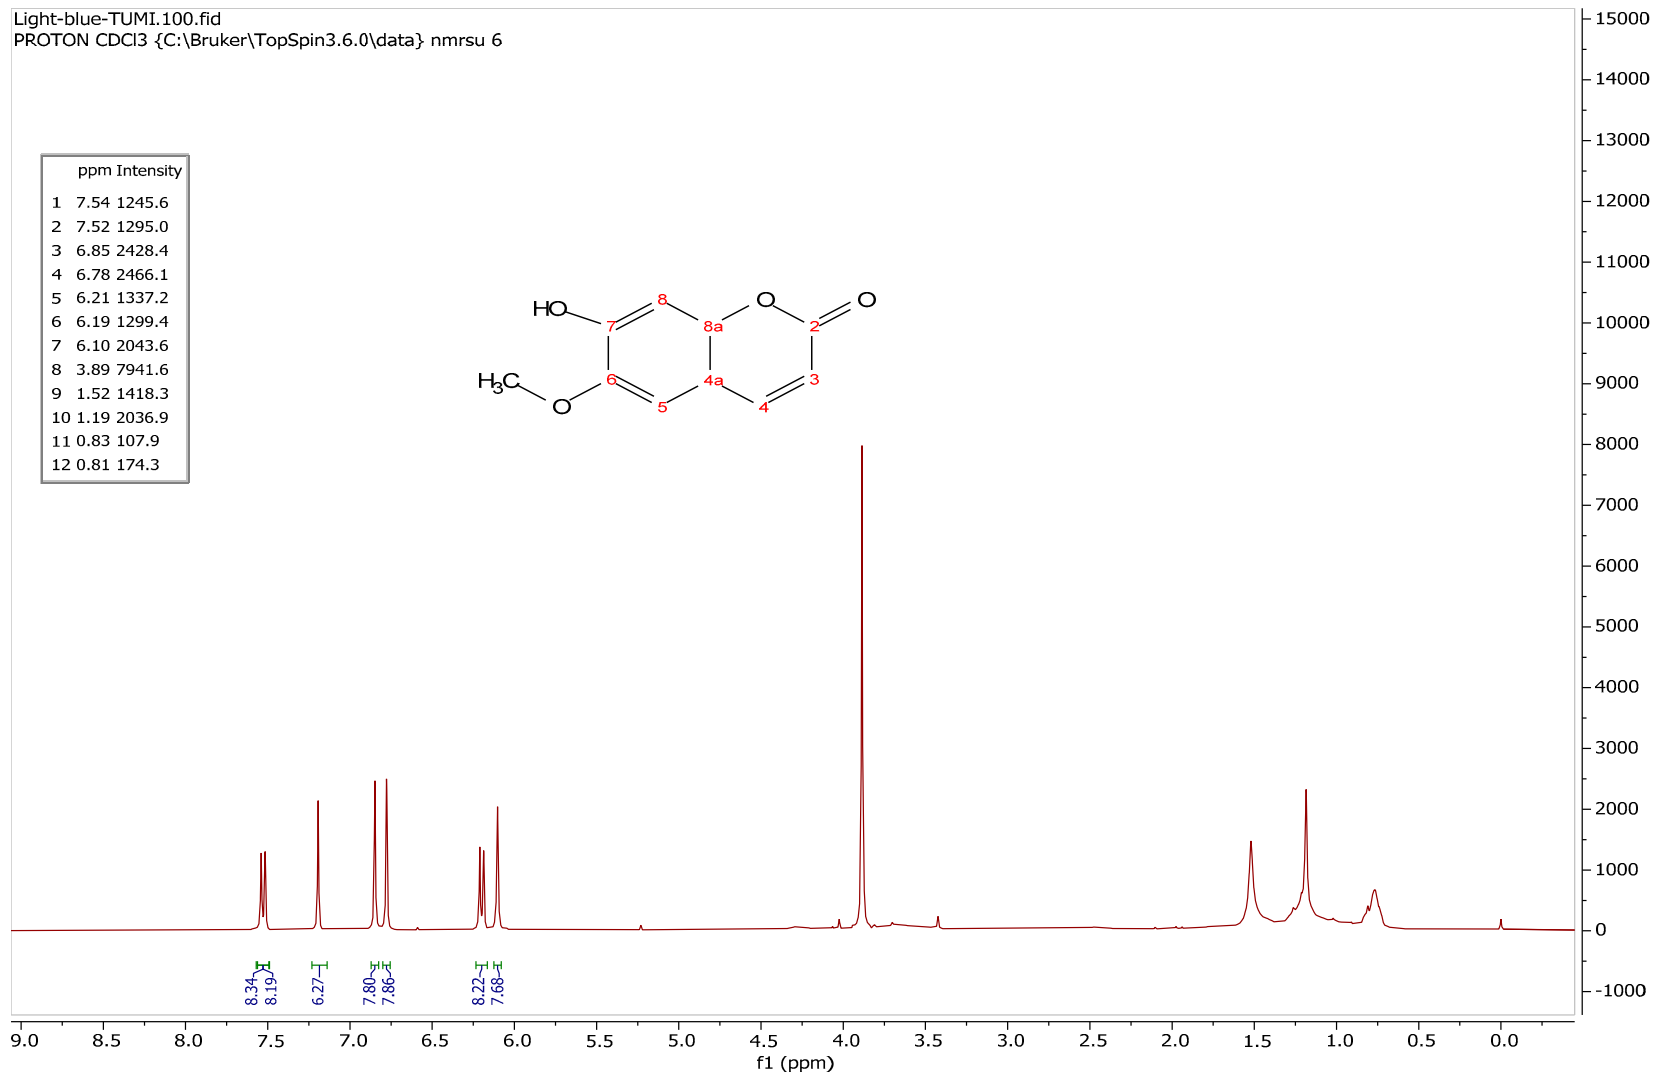

Figure SE.39: Proton Nuclear Magnetic Resonance (<sup>1</sup>H NMR) spectrum of Scopoletin (CDCl<sub>3</sub>, 400 MHz)



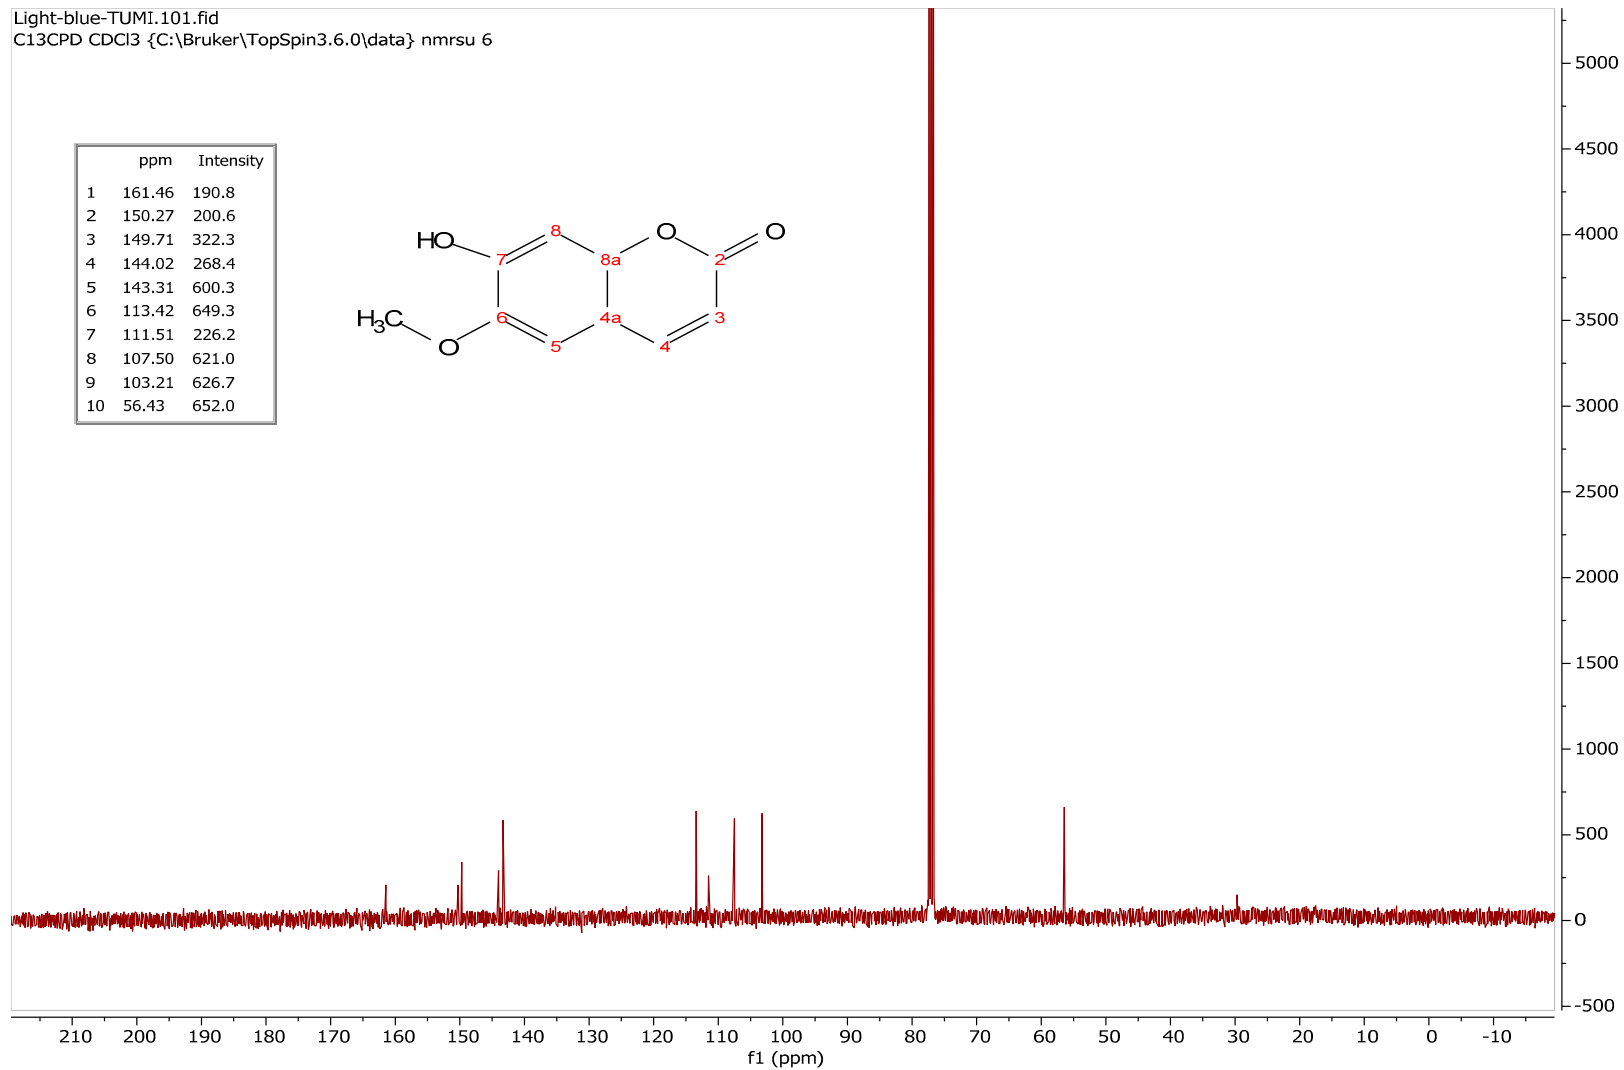

Figure SE.40: Carbon-13 Nuclear Magnetic Resonance ( $^{13}\text{C}$  NMR) spectrum of Scopoletin ( $\text{CDCl}_3$ , 100 MHz)

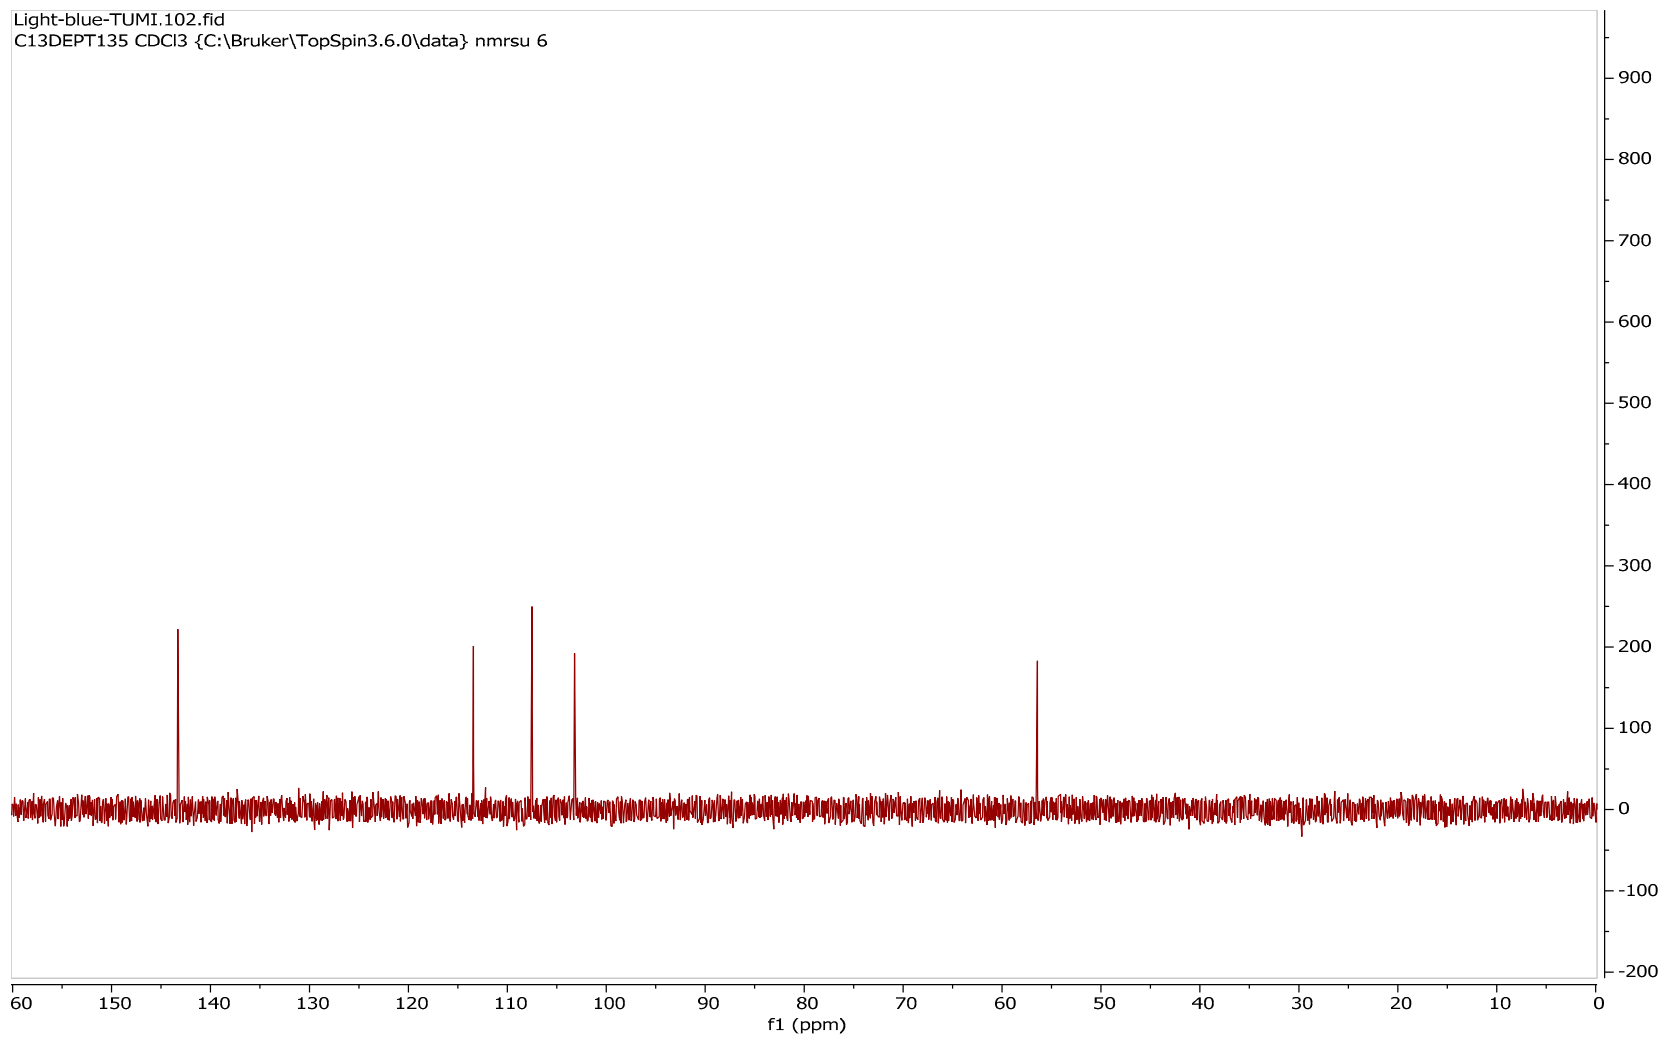

Figure SE.41: Distortionless Enhancement by Polarization Transfer (DEPT) NMR spectra Scopoletin (CDCl<sub>3</sub>, 100 MHz)

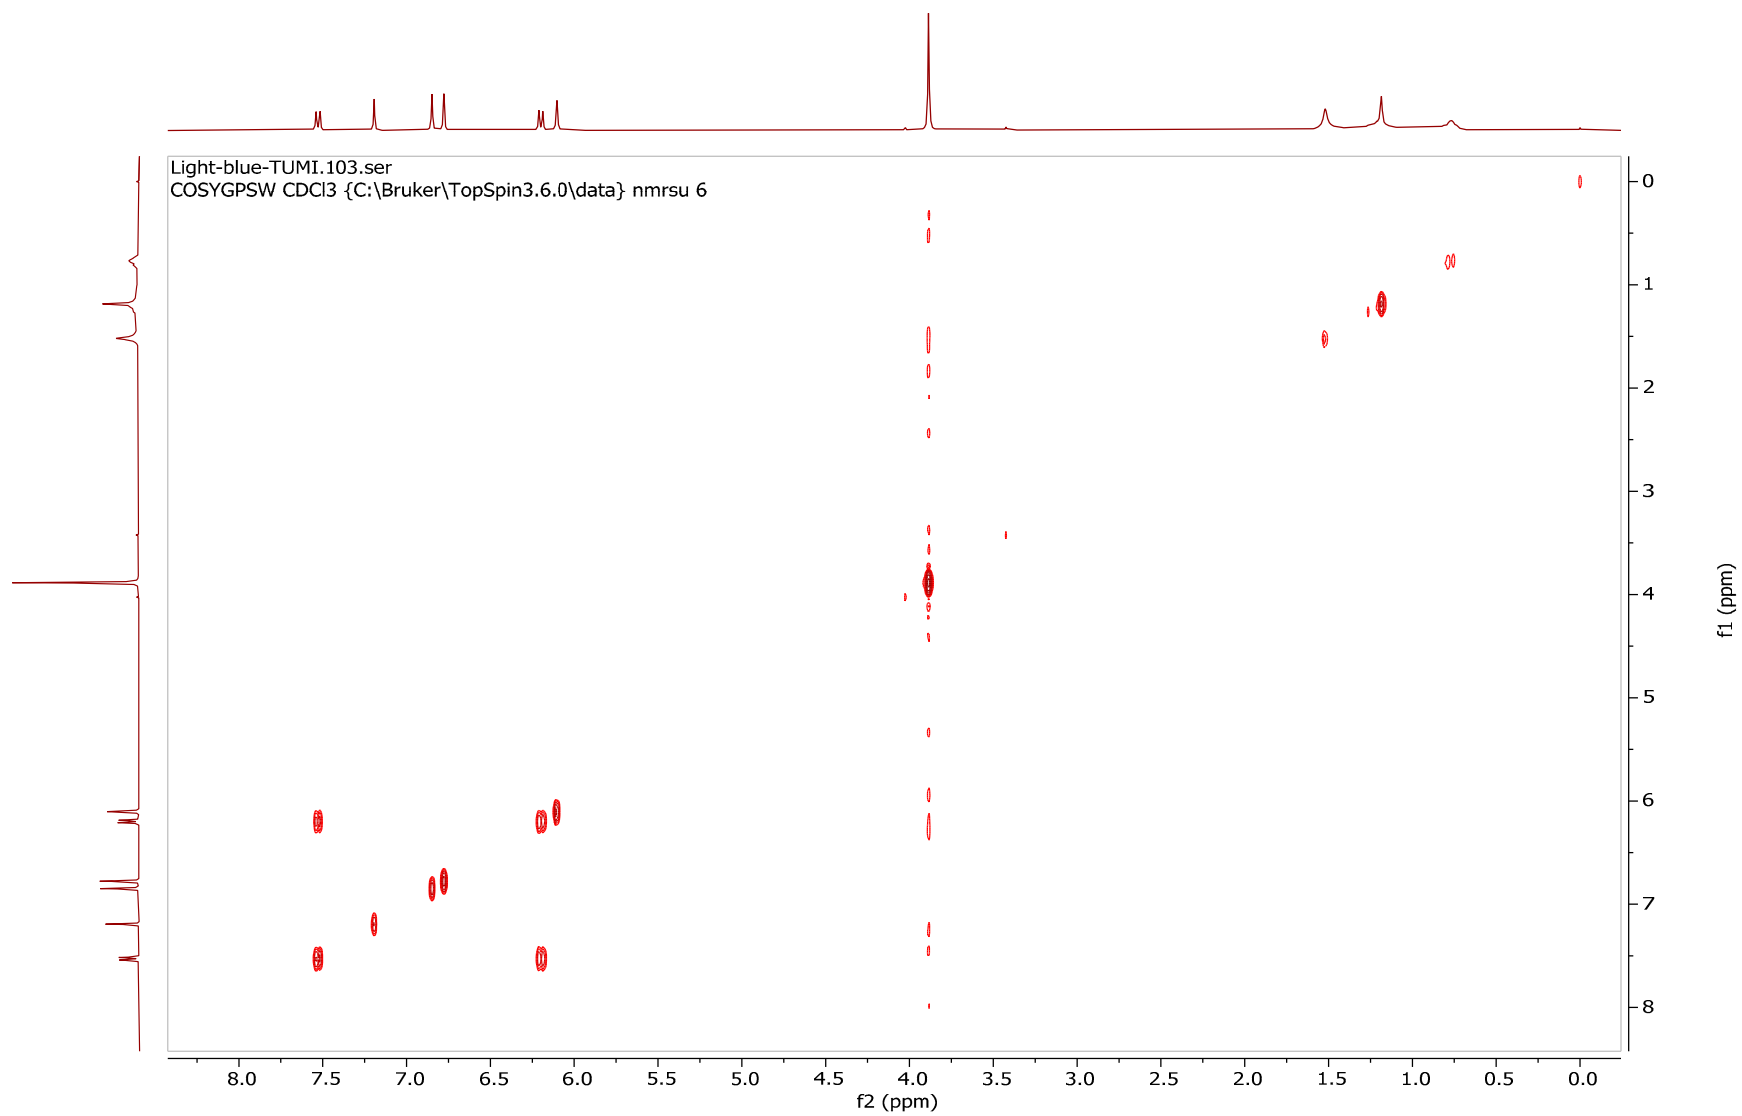

Figure SE.42: Gradient Correlated (gCOSY) spectrum of Scopoletin

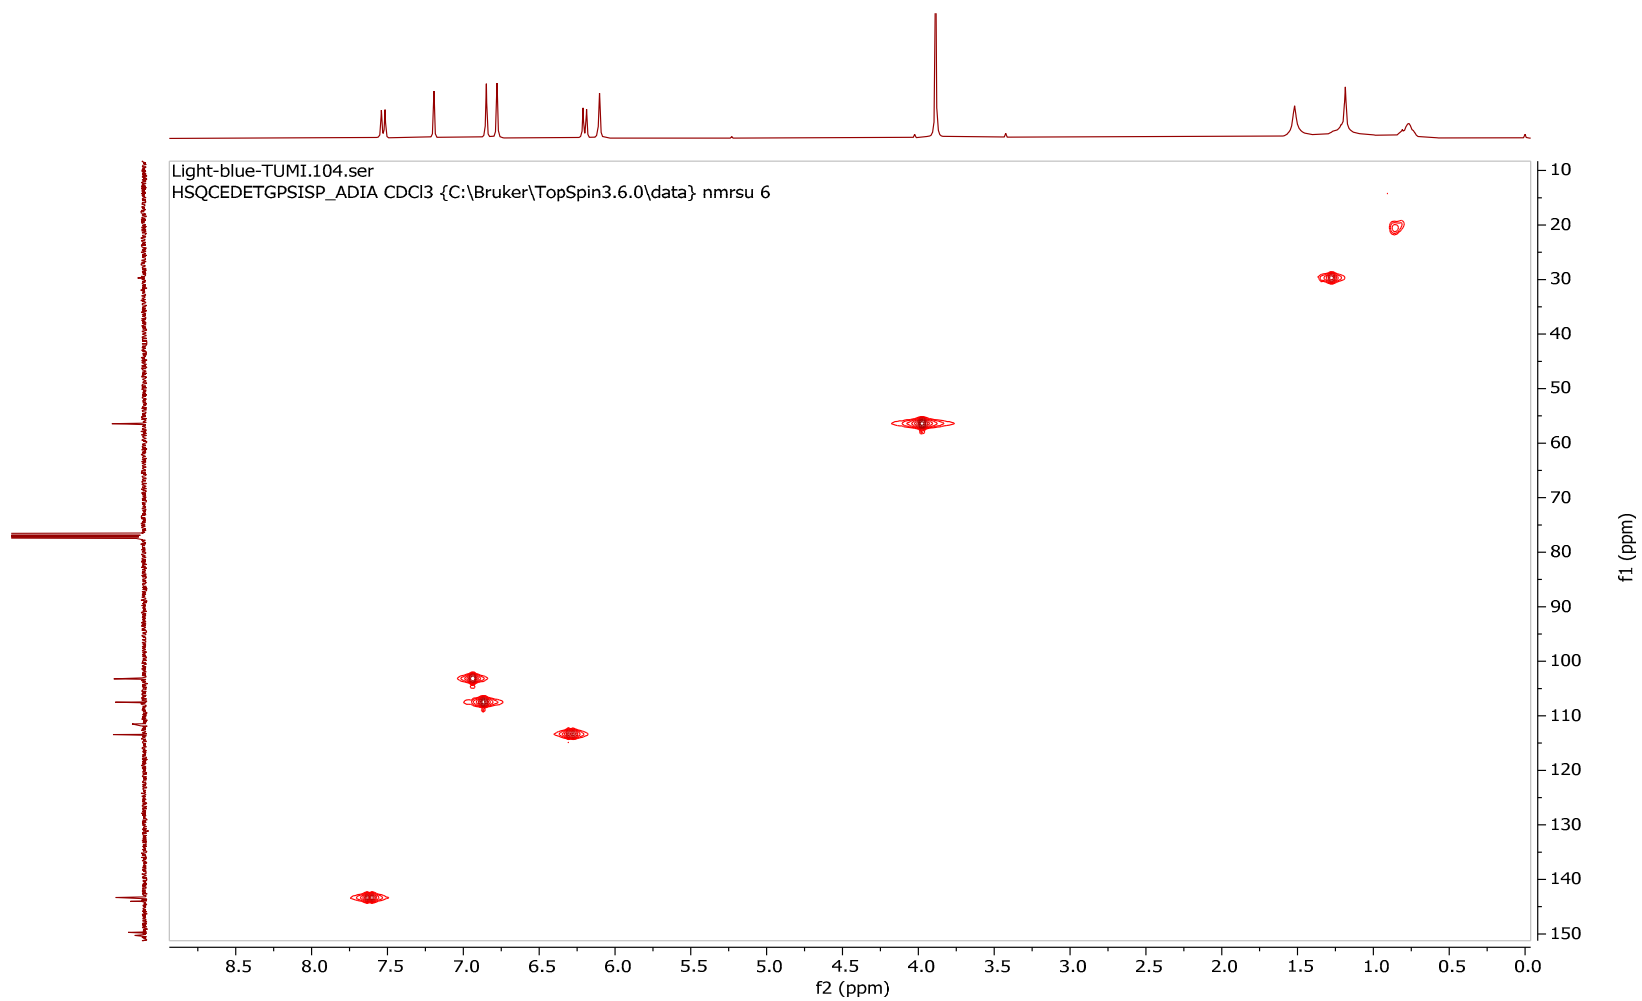

Figure SE.43: Gradient Heteronuclear Single Quantum Coherence (gHSQC) spectrum of Scopoletin

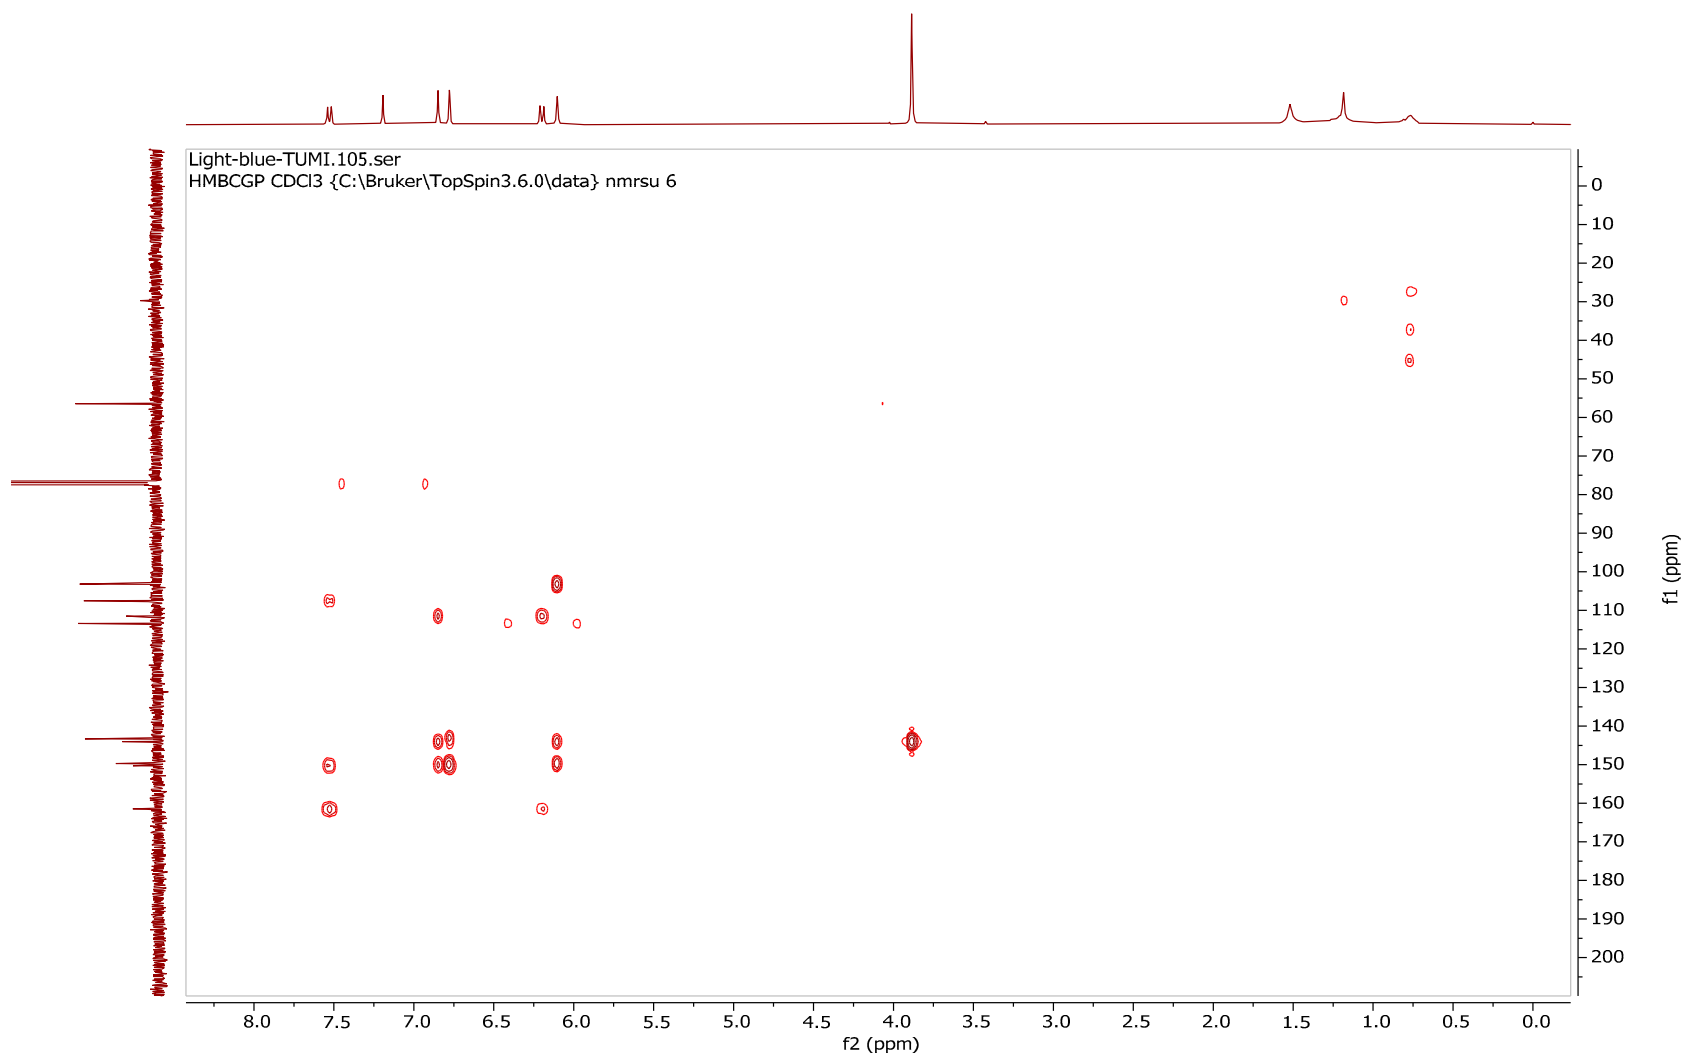

Figure SE.44: Gradient Heteronuclear Multiple Bond Quantum Coherence (gHMBC) spectrum of Scopoletin

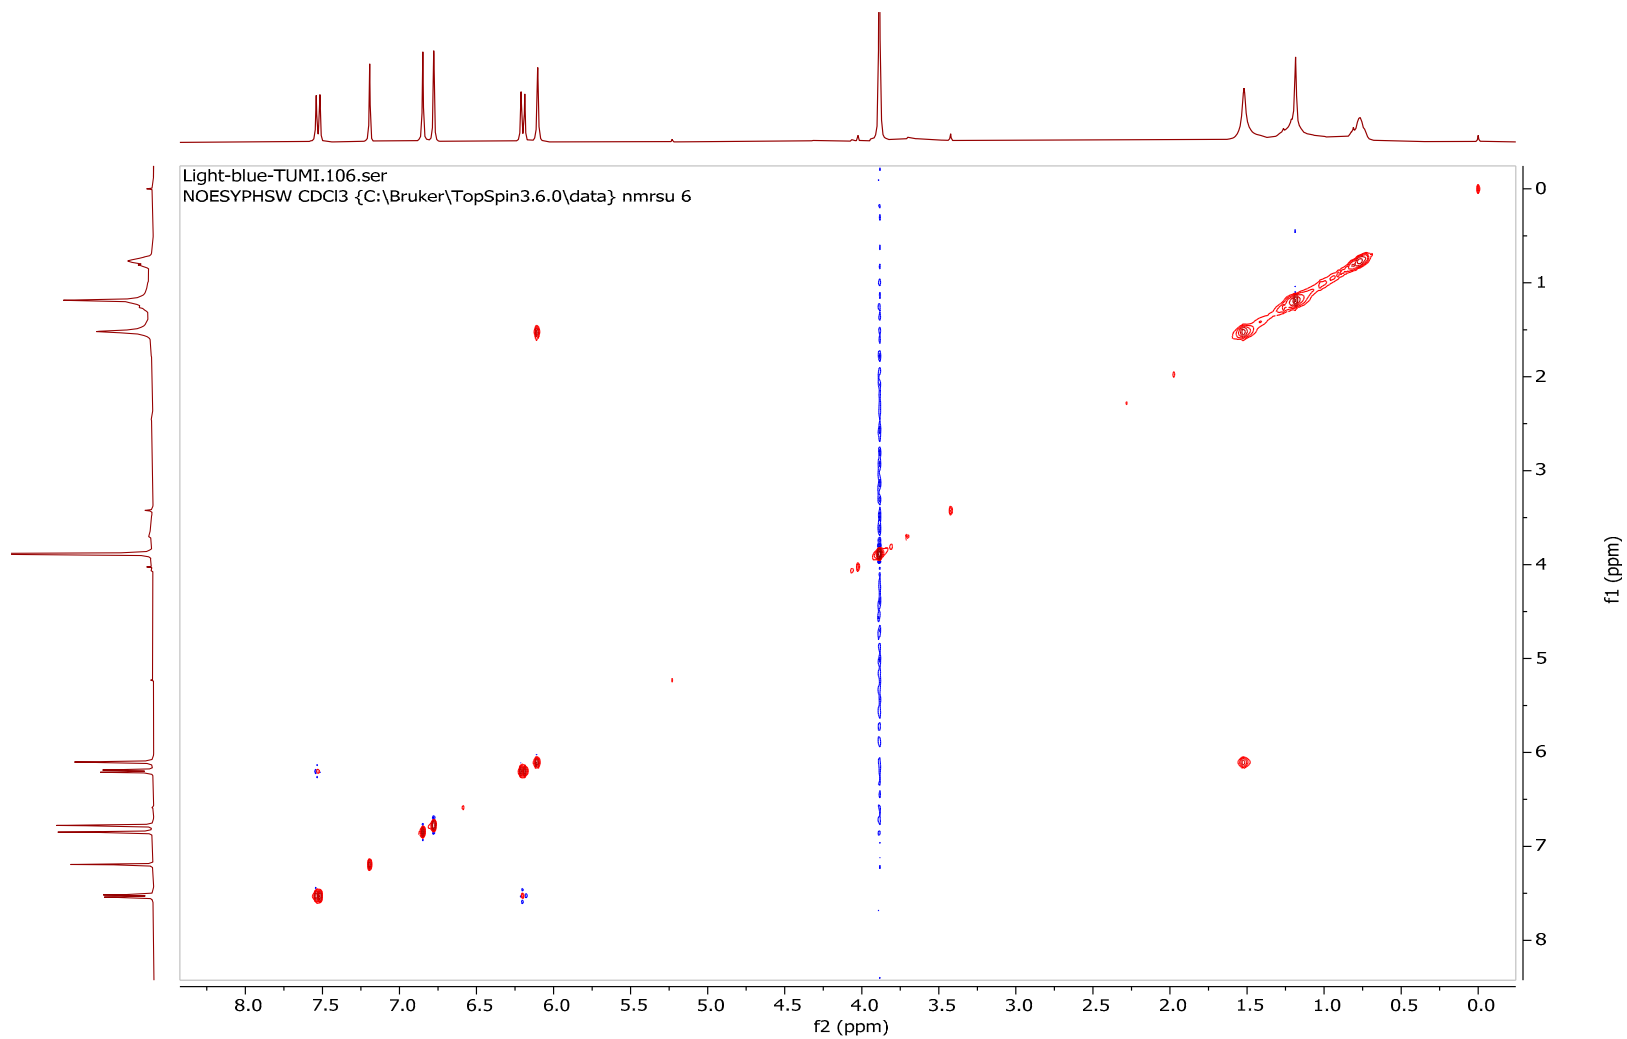

Figure SE.45: Nuclear Overhauser Effect Spectroscopy (NOESY) spectrum of Scopoletin

## 6. Spectral data of Compound F

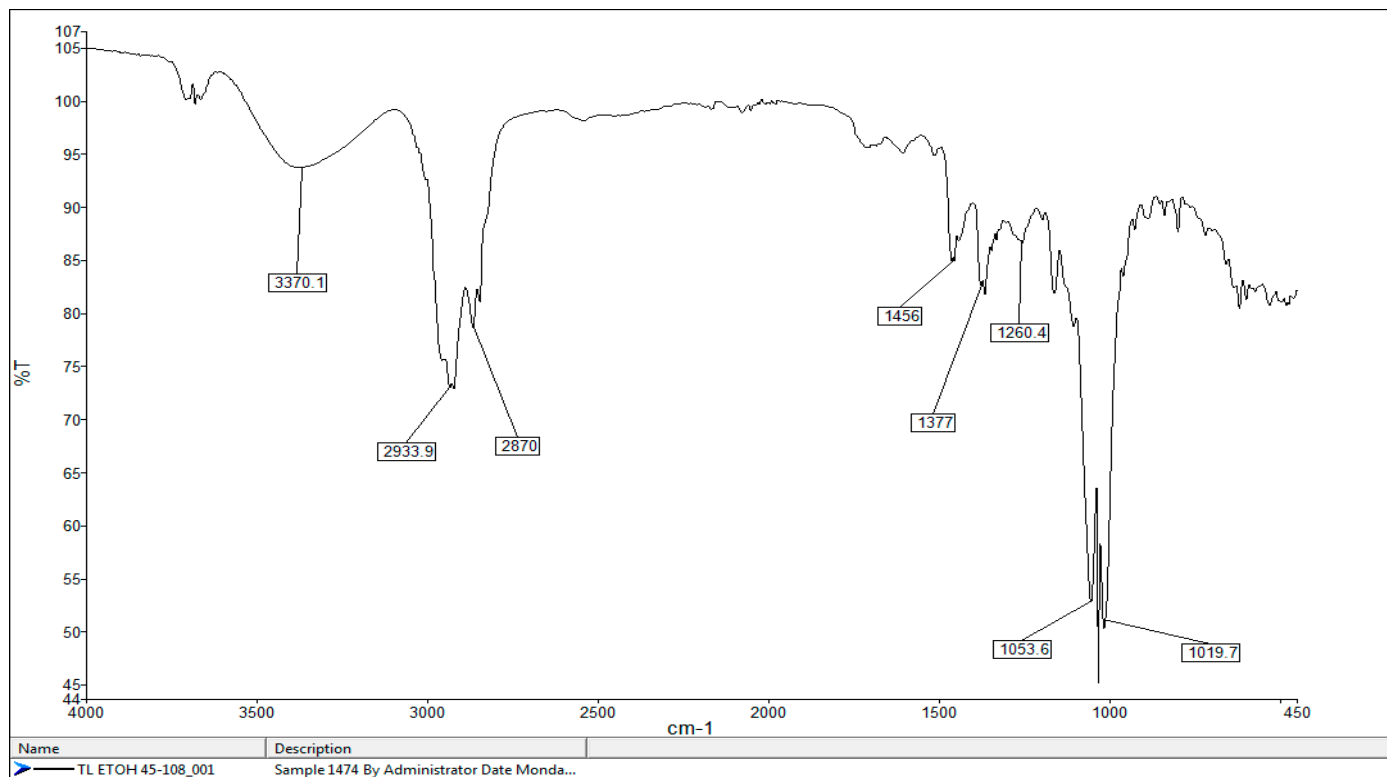

Figure SF.46: Fourier-Transform Infrared Spectroscopy (FTIR) spectrum of Sitosterol glucopyranoside

TL EtOH 45-108

JT\_TUT\_220317\_21A 11 (0.076) Cm (10:24-2:7)

1: TOF MS AP+  
2.13e4

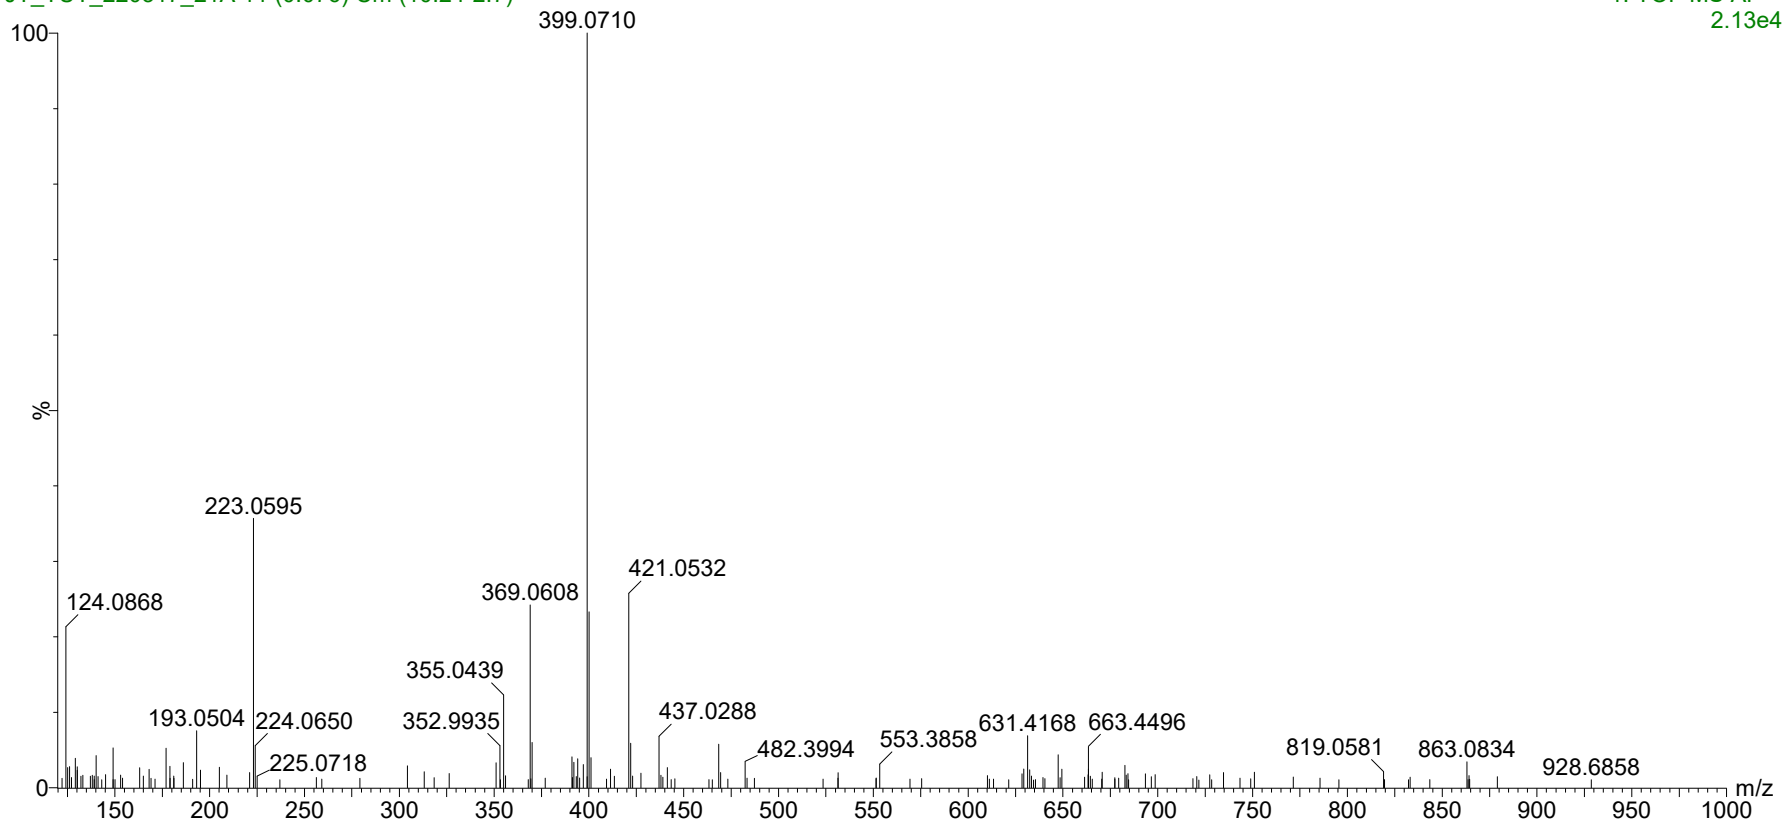

Figure SF.47: High-Resolution Electrospray Ionization Mass spectrum (HR-ESI-MS) of Sitosterol glucopyranoside  $[M + H - H_2O C_6H_{12}O_6]^+$ .  $m/z = 399.0710$



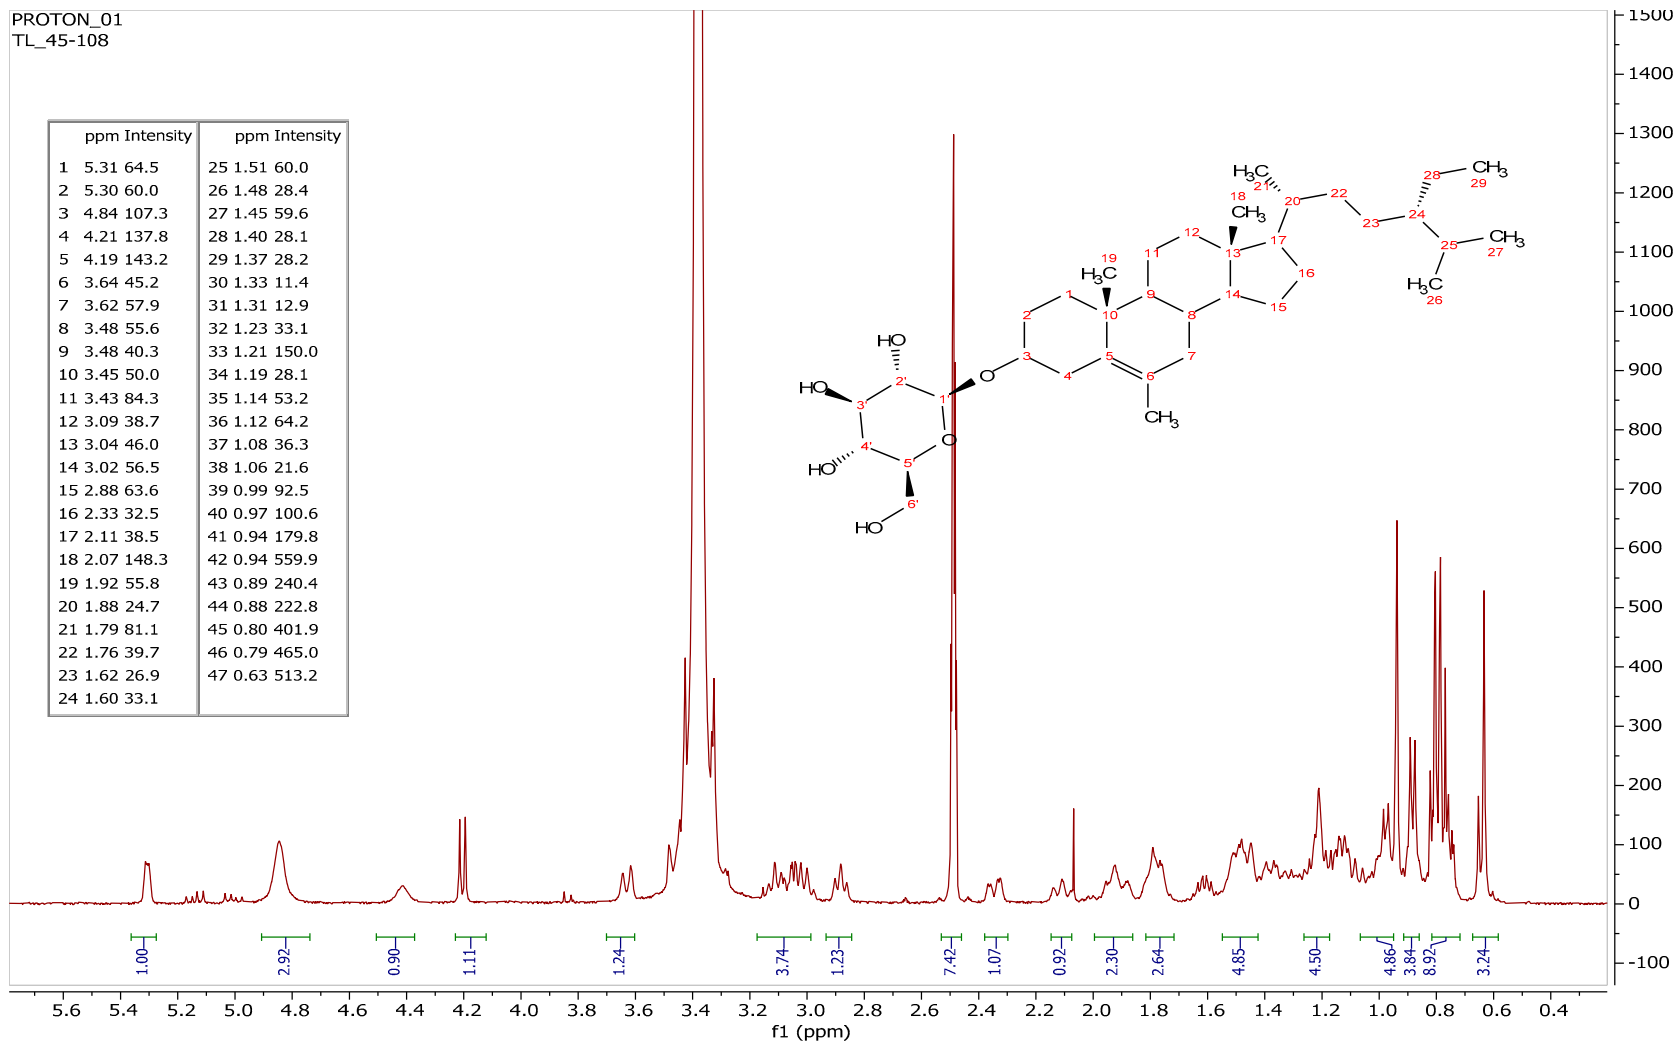

Figure SF.48: Proton Nuclear Magnetic Resonance ( $^1\text{H}$  NMR) spectrum of Sitosterol glucopyranoside (DMSO, 400 MHz)

CARBON\_01  
TL\_45-108

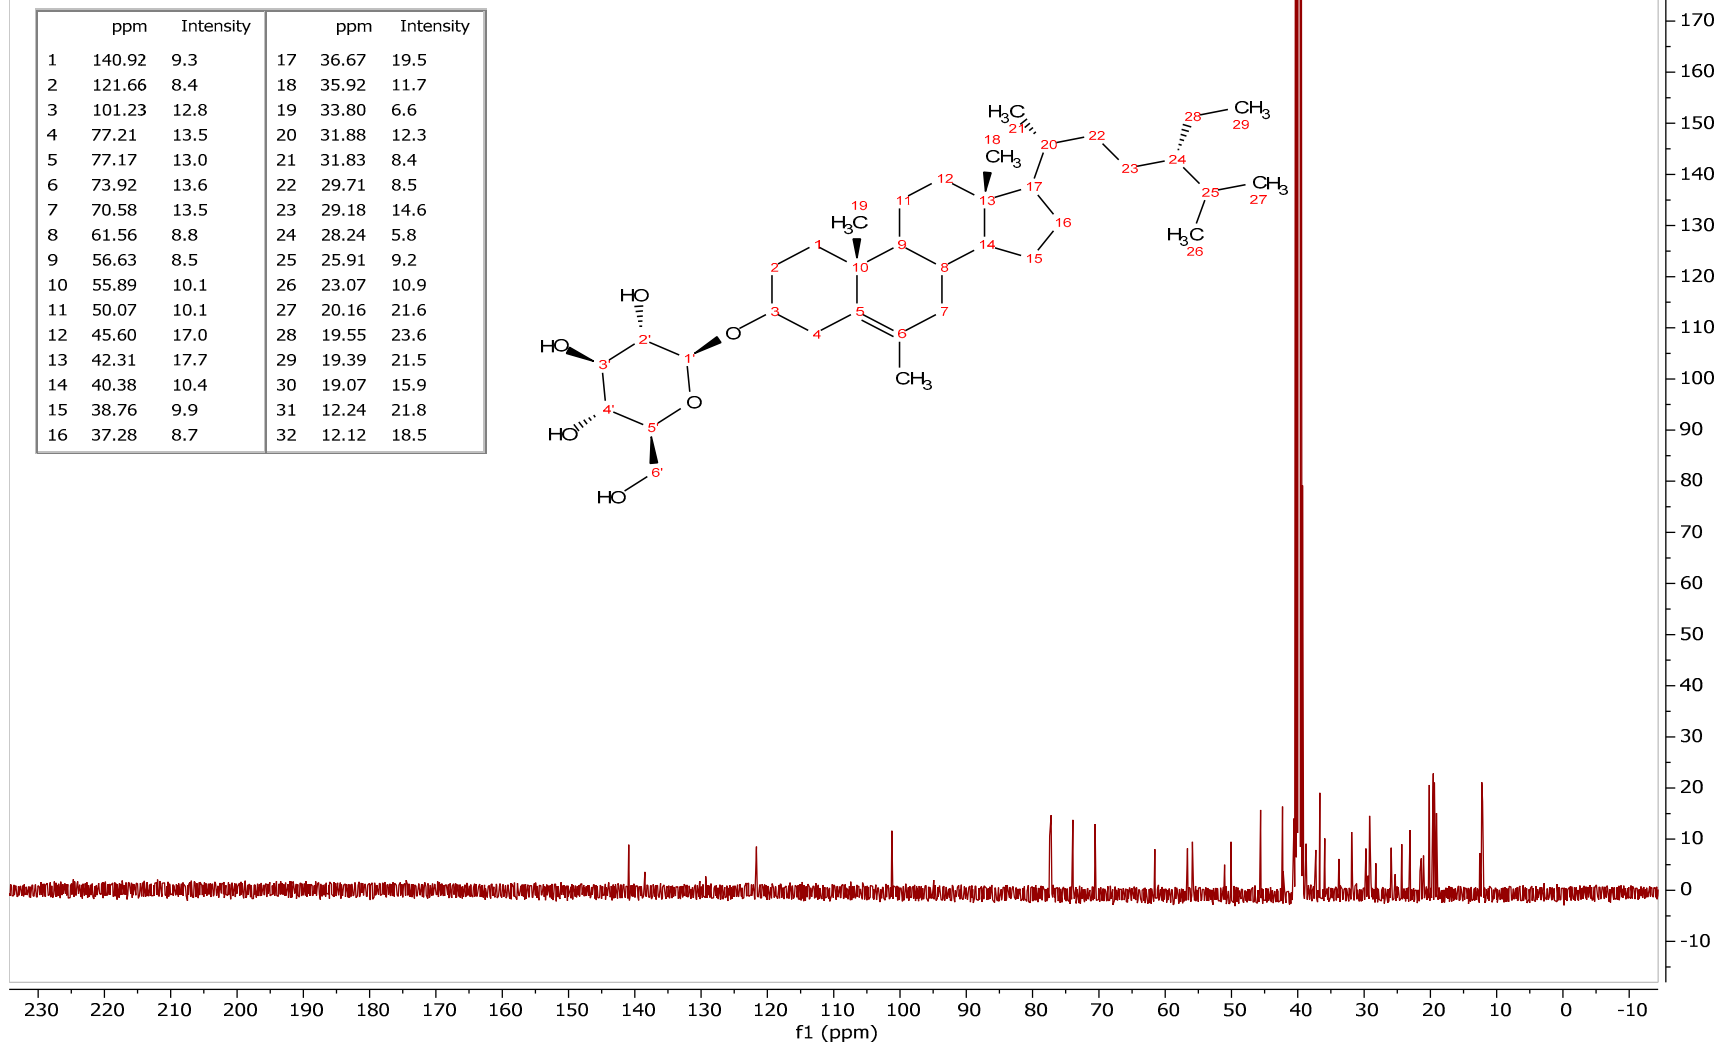

Figure SF.49: Carbon-13 Nuclear Magnetic Resonance ( $^{13}\text{C}$  NMR) spectrum of Sitosterol glucopyranoside (DMSO, 100 MHz)

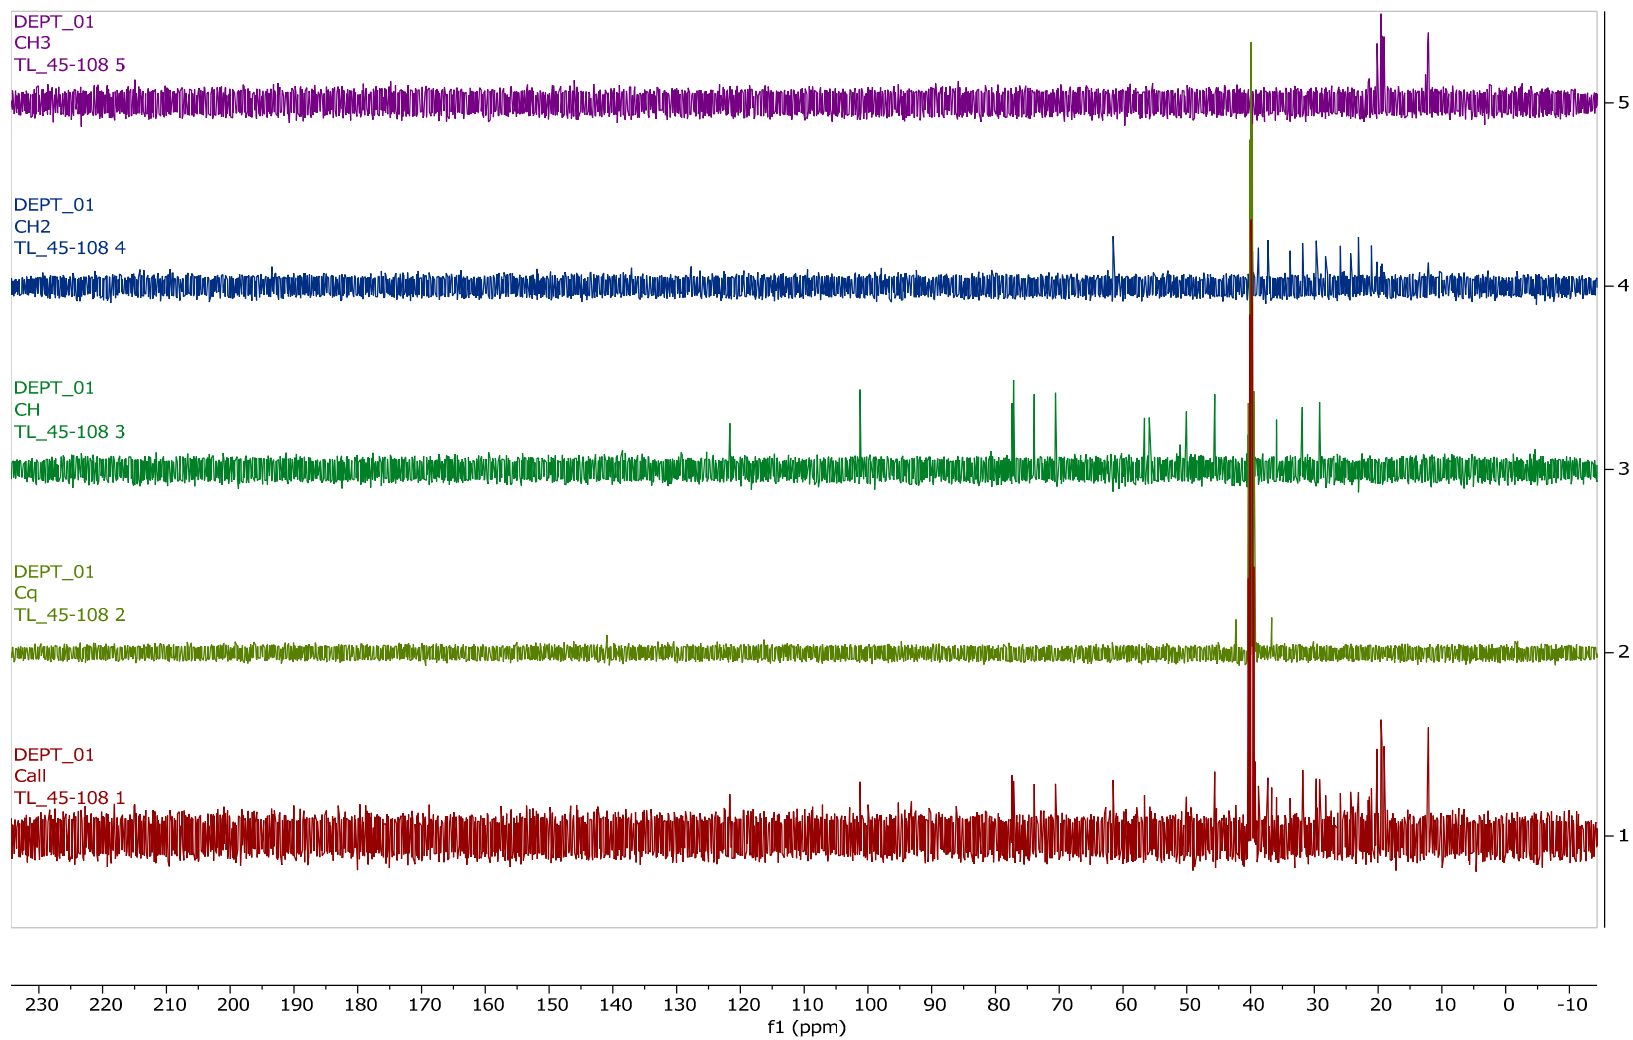

Figure SF.50: Distortionless Enhancement by Polarization Transfer (DEPT) NMR spectra Sitosterol glucopyranoside (DMSO, 100 MHz)

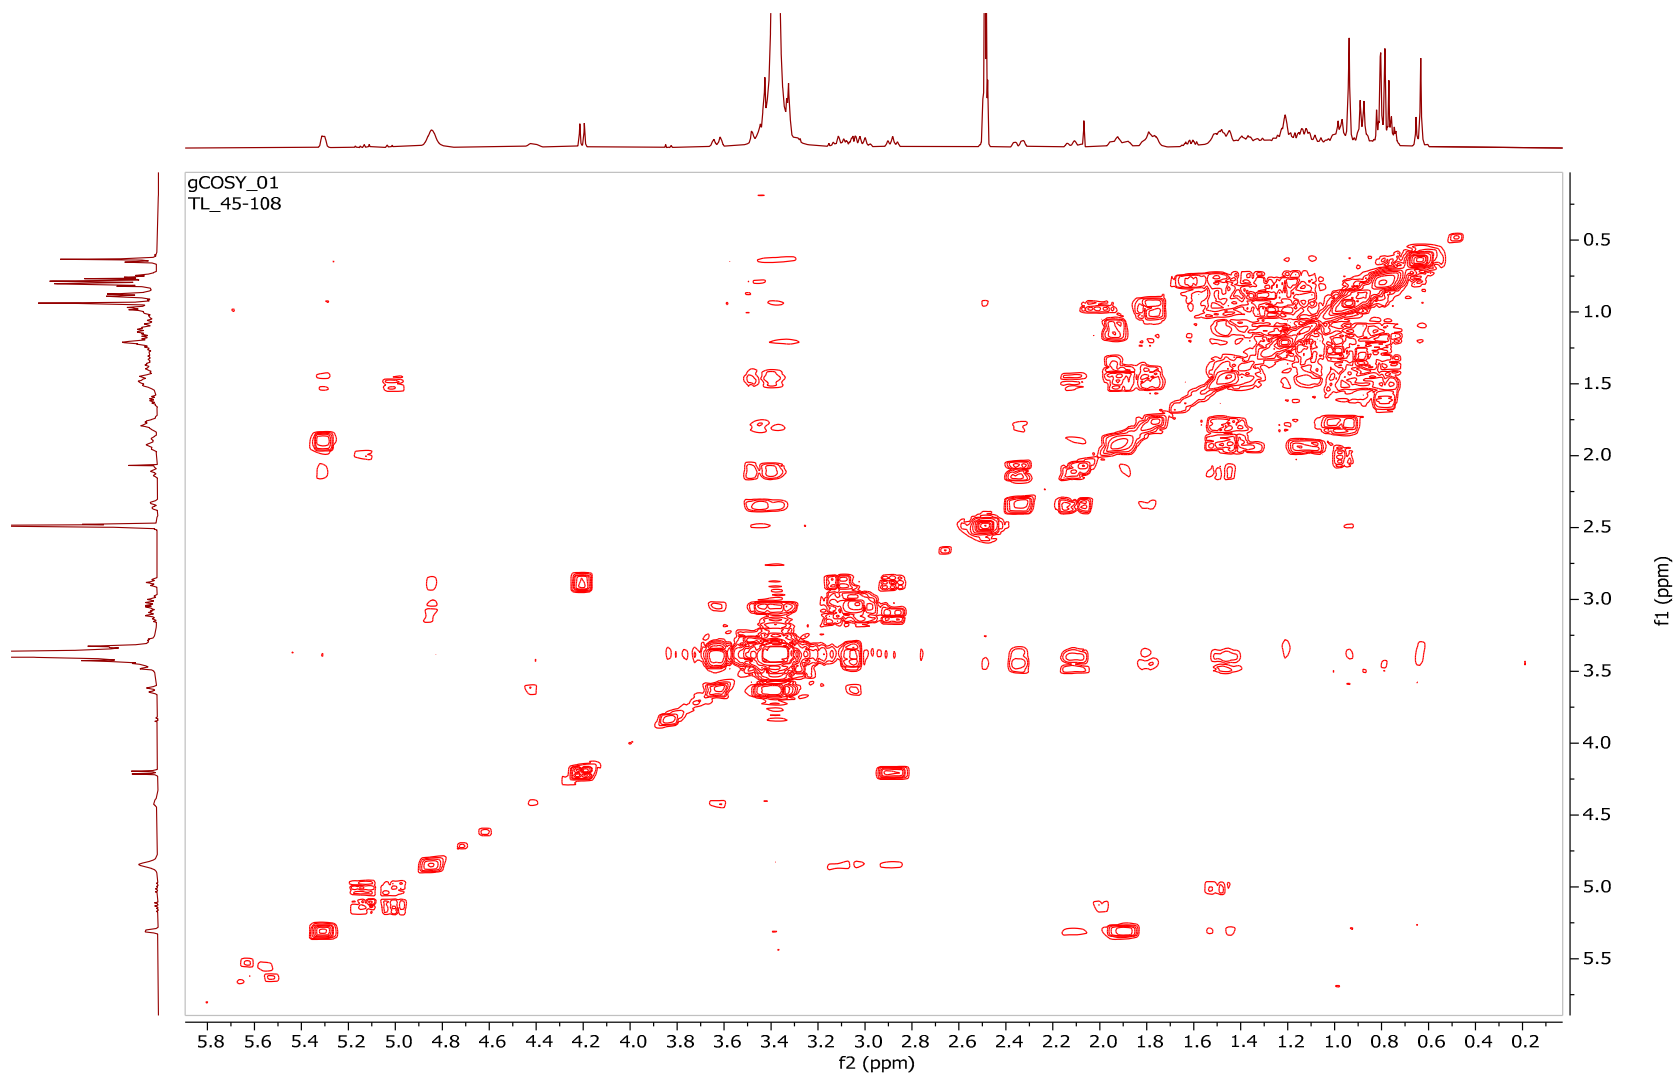

Figure SF.51: Gradient Correlated (gCOSY) spectrum of Sitosterol glucopyranoside

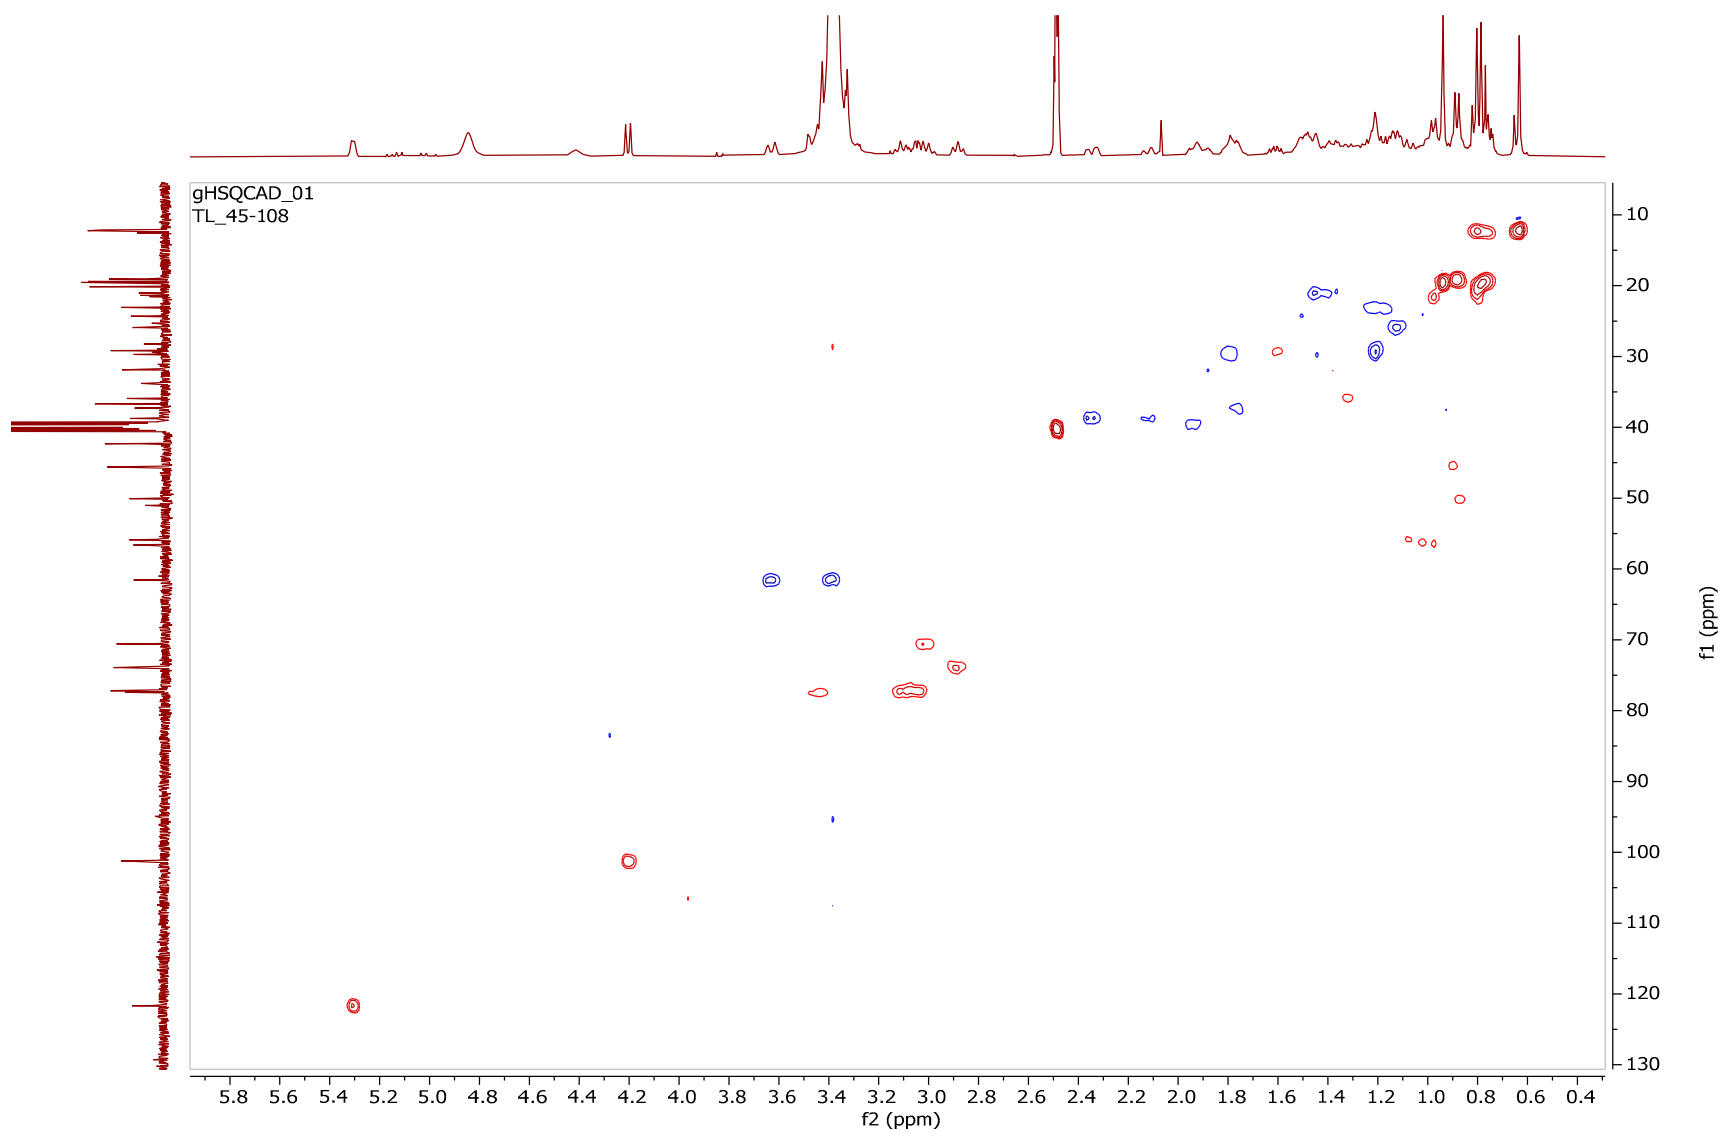

Figure SF.52: Gradient Heteronuclear Single Quantum Coherence (gHSQC) spectrum of Sitosterol glucopyranoside

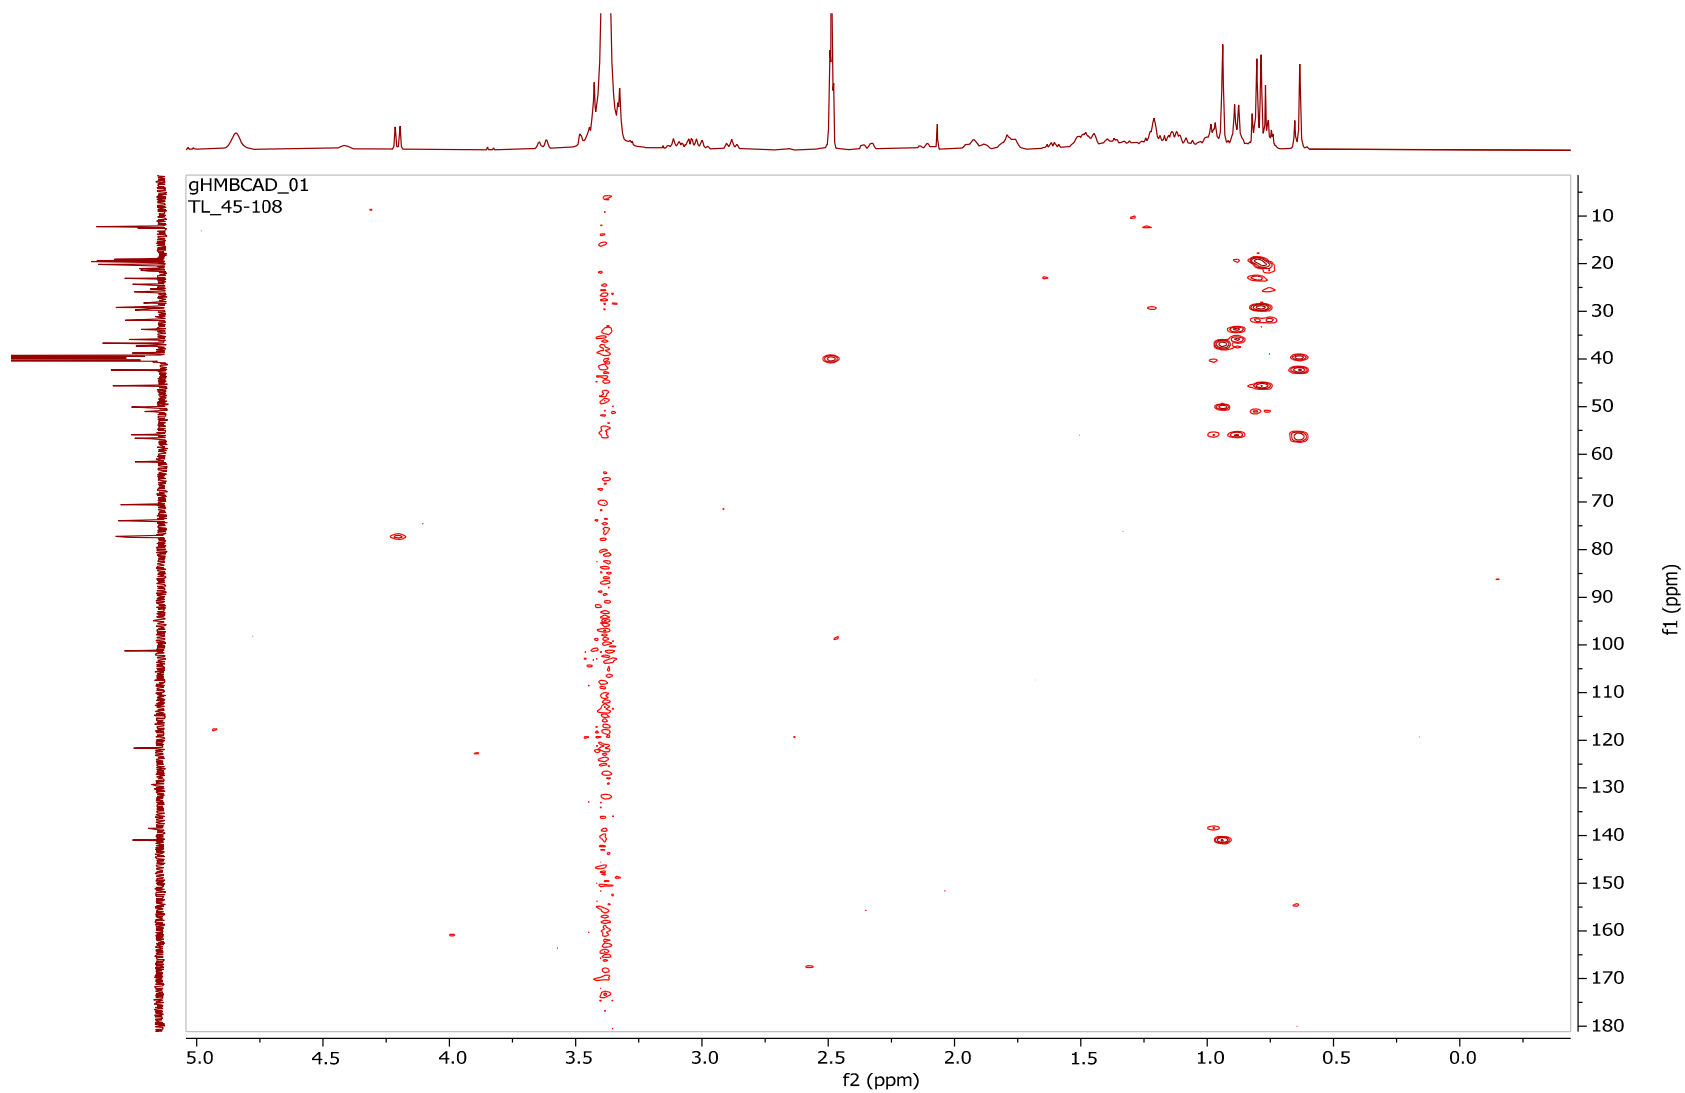

Figure SF.53: Gradient Heteronuclear Multiple Bond Quantum Coherence (gHMBC) spectrum of Sitosterol glucopyranoside

7. Spectral data of Compound G

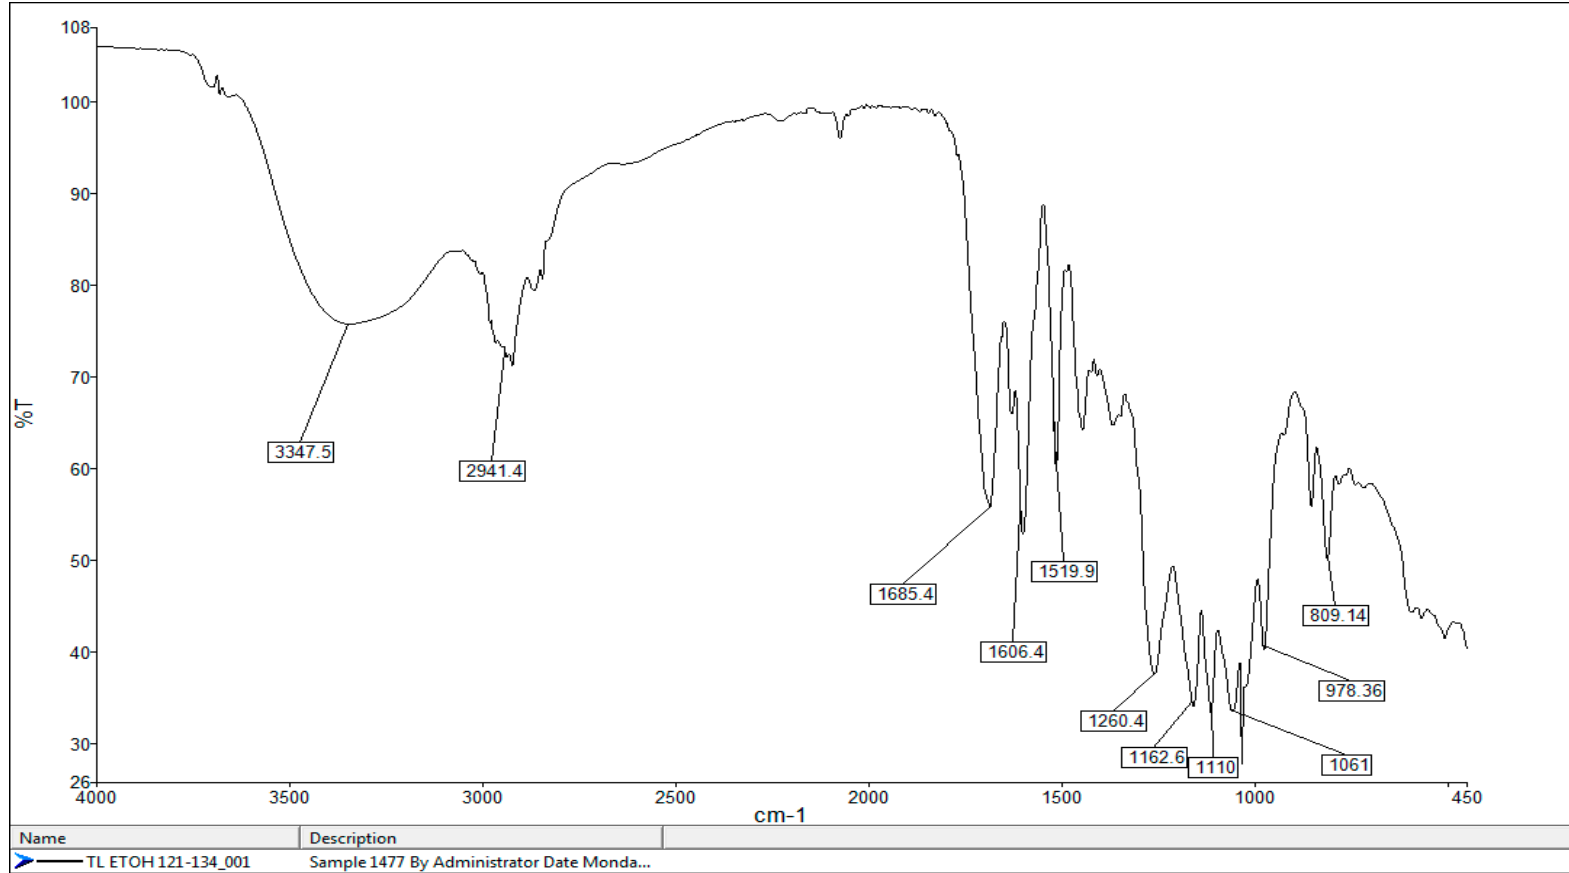

Figure SG.54: Fourier-Transform Infrared Spectroscopy (FTIR) spectrum of 1.5 Di-Feruloylquinicacid

TL 121-134

JT\_TUT\_220317\_22A 11 (0.076) Cm (9:15)

1: TOF MS AP+  
2.35e4

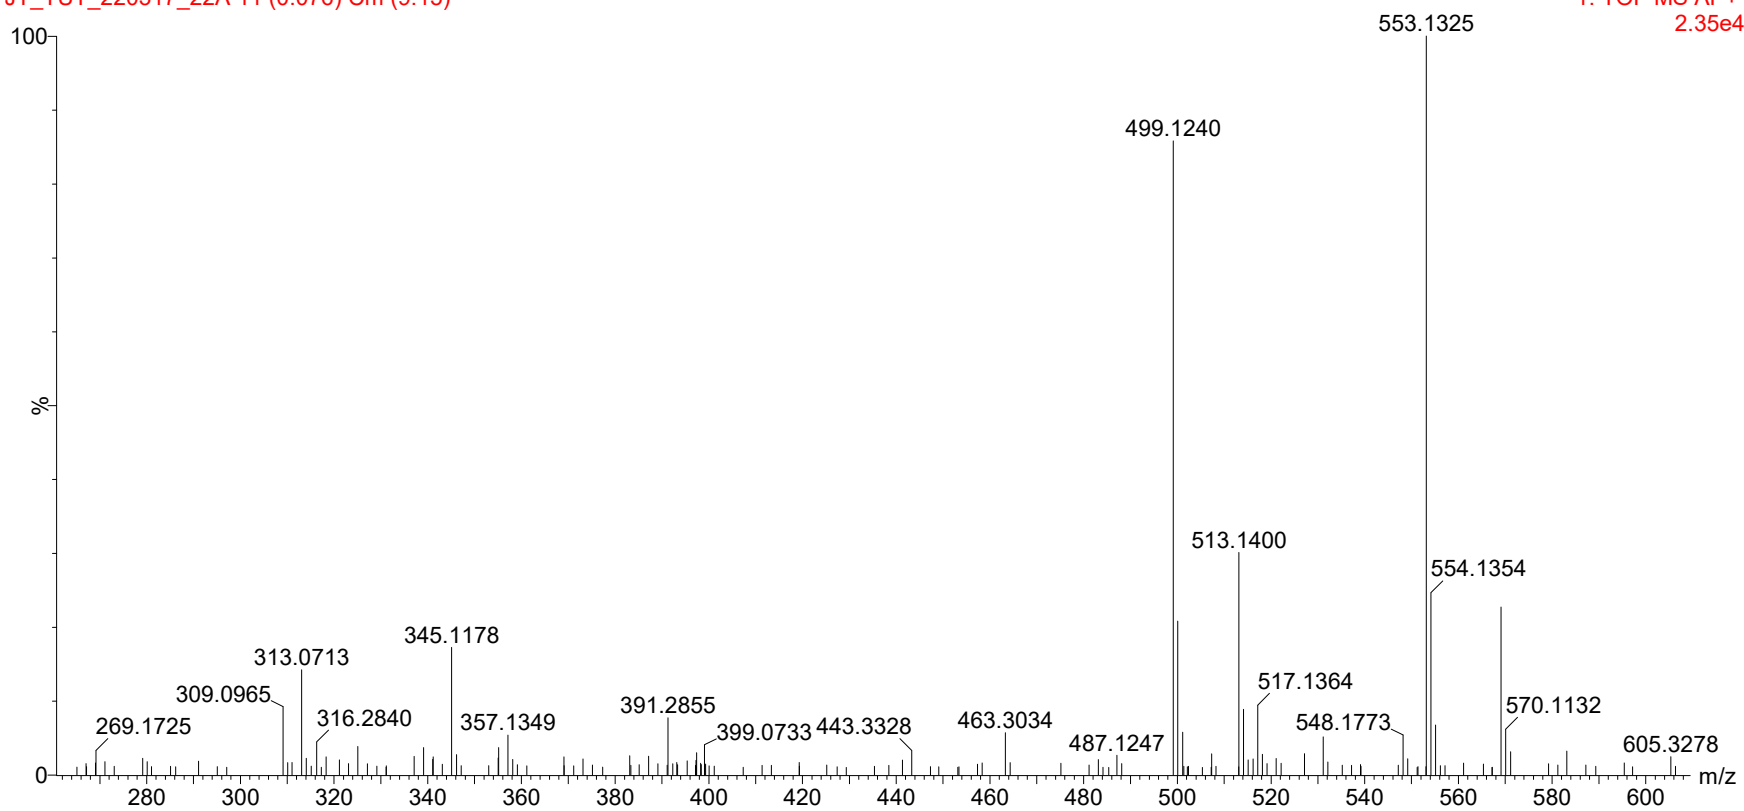

Figure SG.55: High-Resolution Electrospray Ionization Mass spectrum (HR-ESI-MS) of 1.5 Di-Feruloylquinicacid  $[M-Na+H_2O]^-$   $m/z = 553.1325$



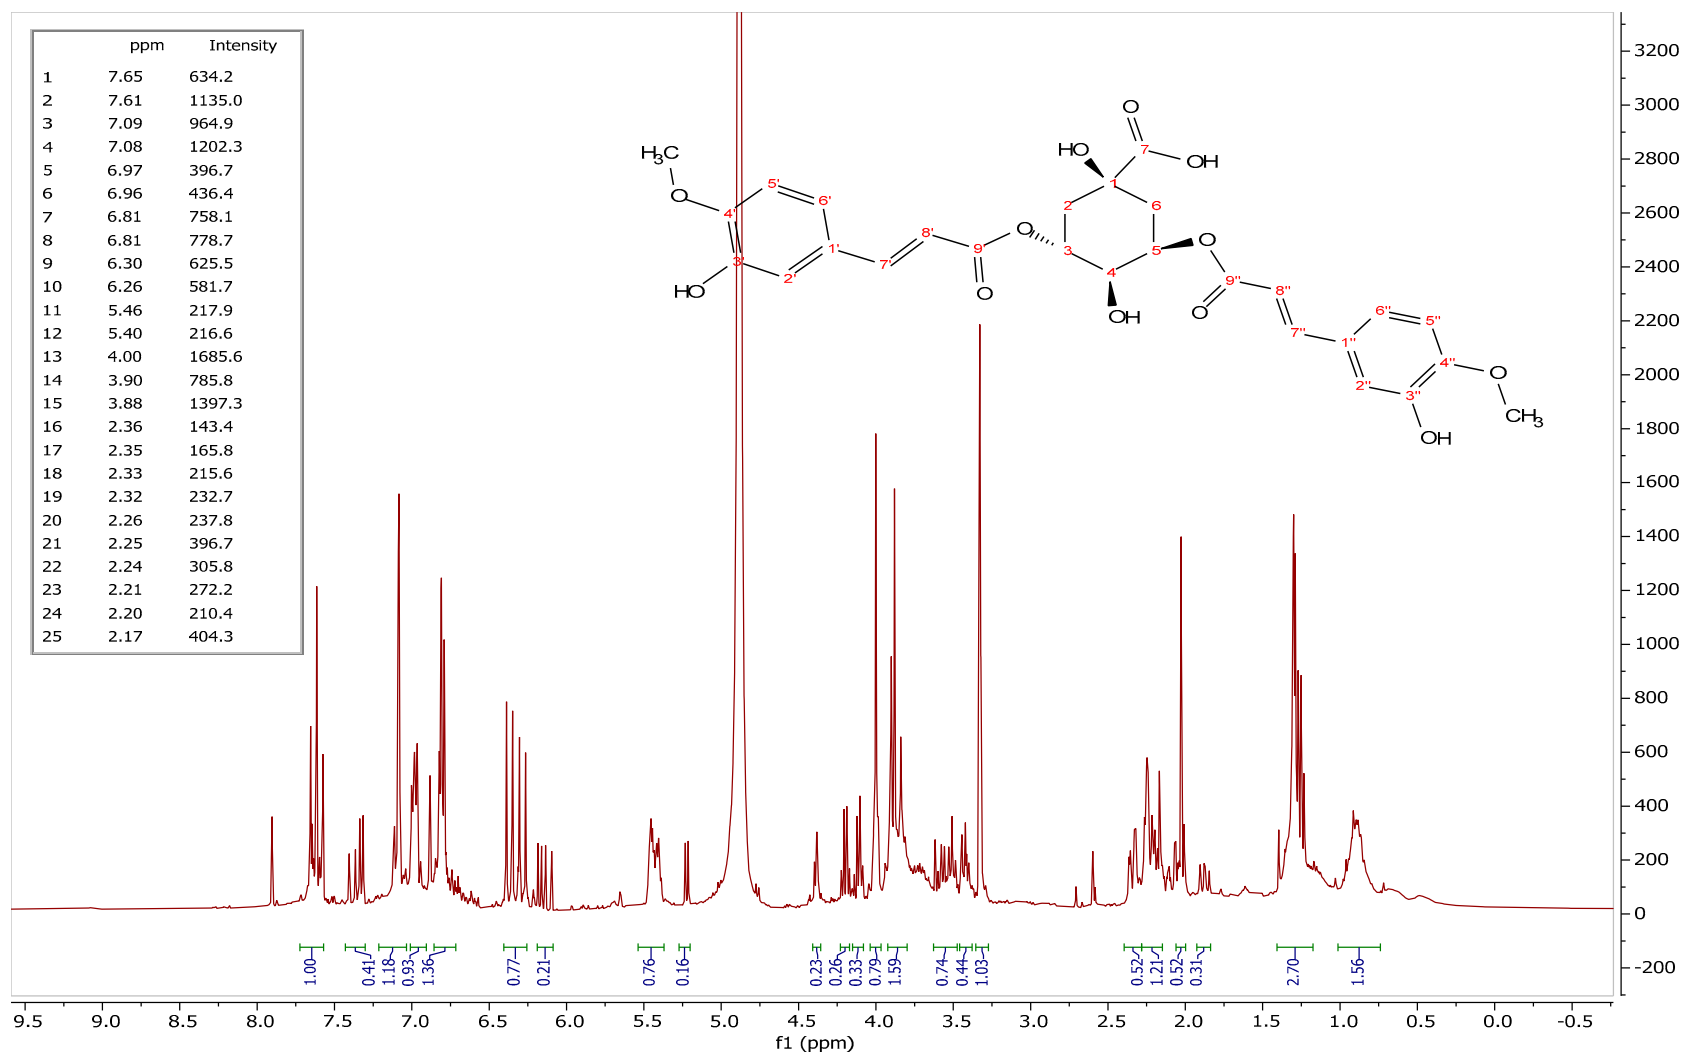

Figure SG.56: Proton Nuclear Magnetic Resonance ( $^1\text{H}$  NMR) spectrum of 1.5 Di-Feruloylquinicacid (MeOD, 400 MHz)

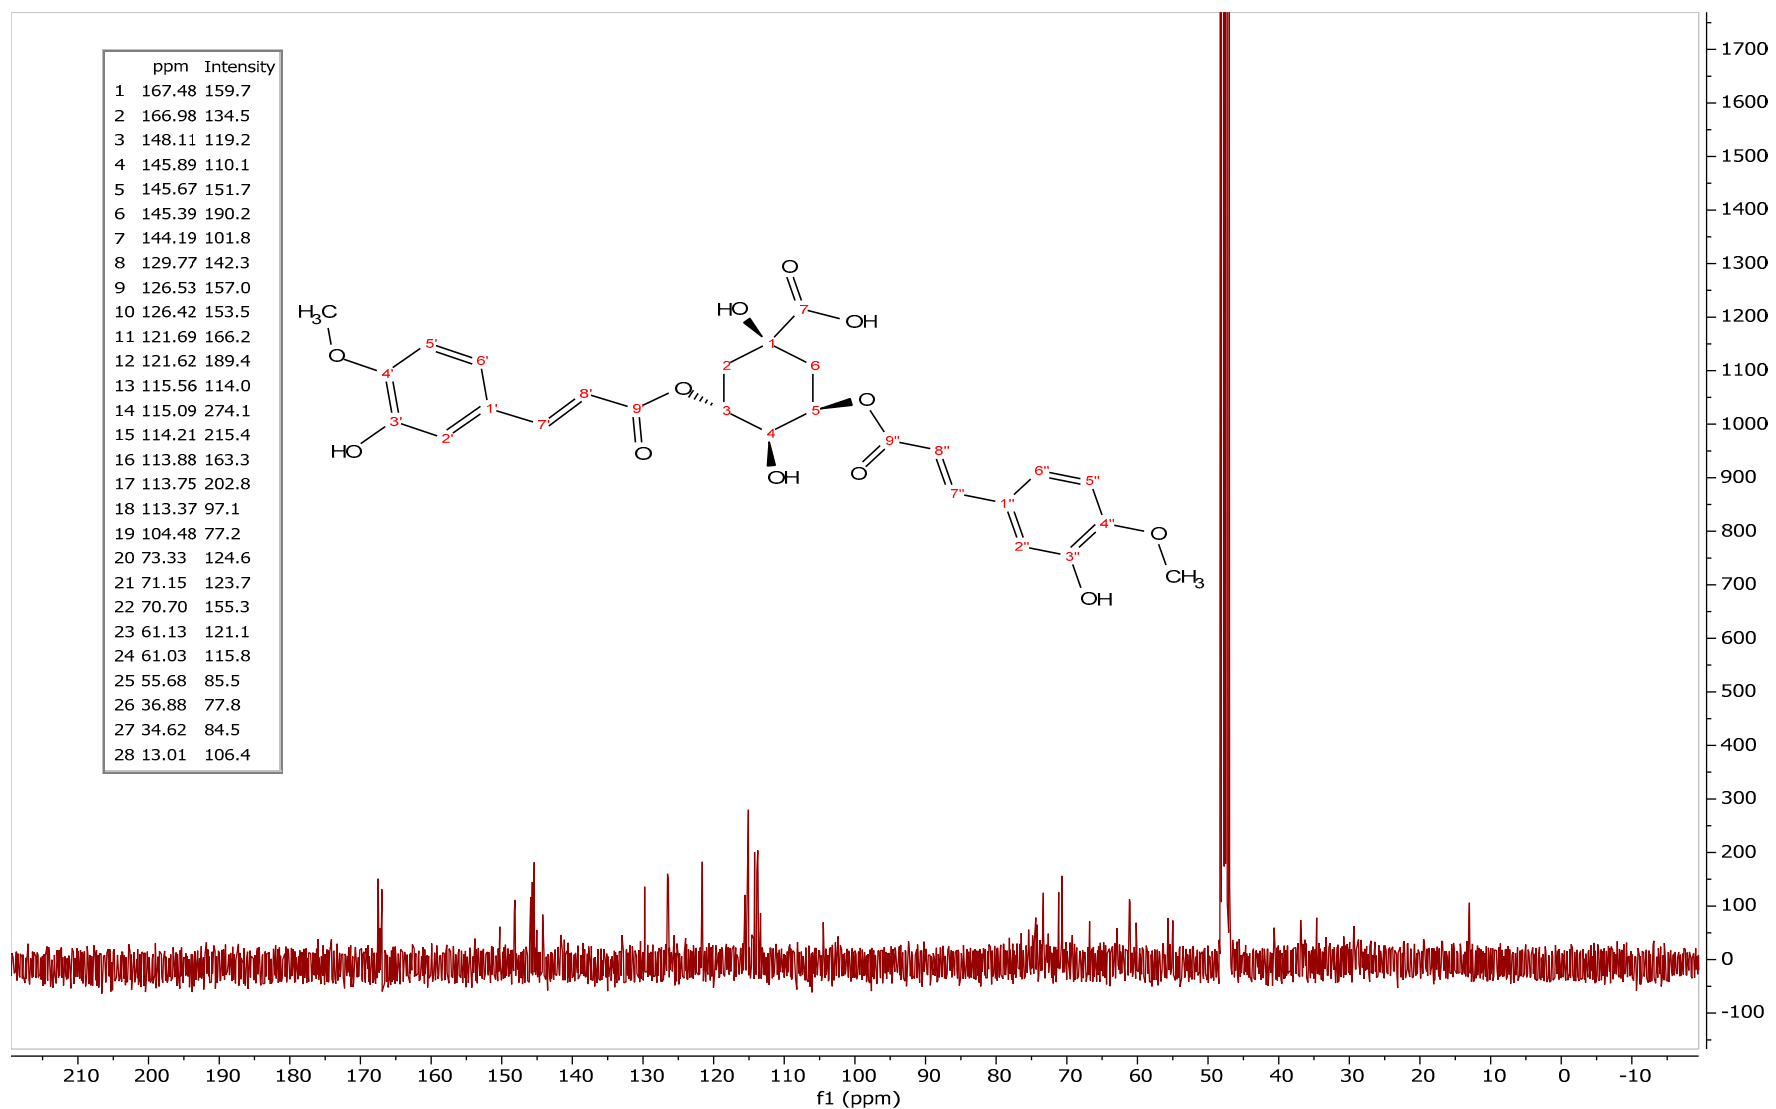

Figure SG.57: Carbon-13 Nuclear Magnetic Resonance ( $^{13}\text{C}$  NMR) spectrum of 1.5 Di-Feruloylquinic acid (MeOD, 100 MHz)

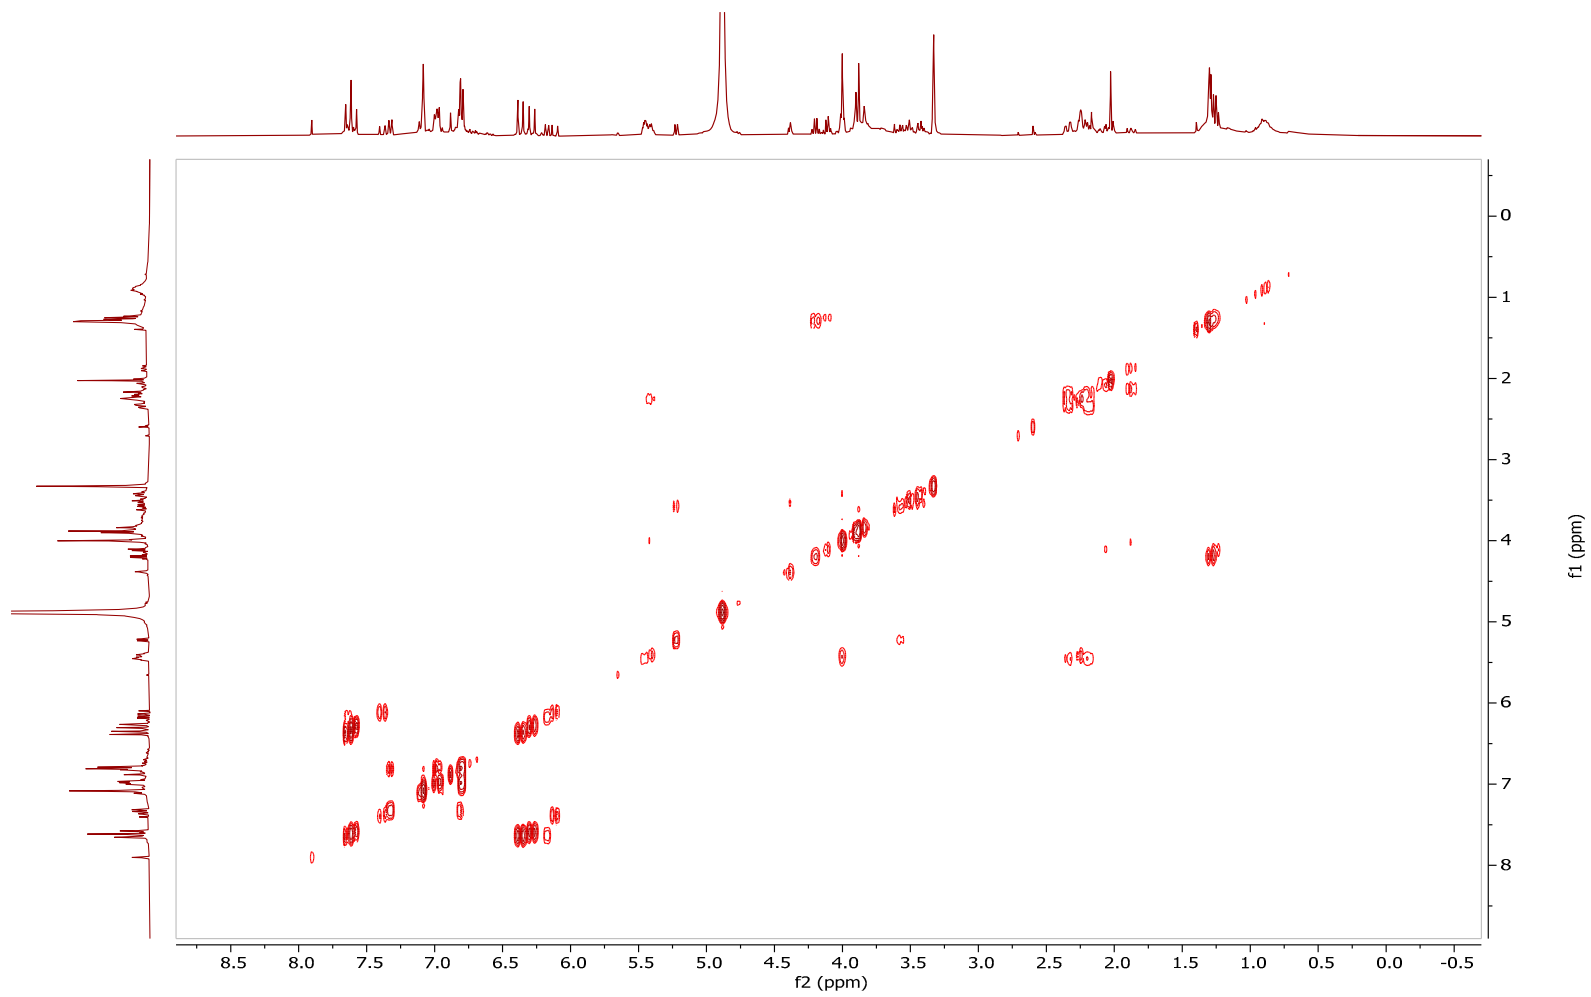

Figure SG.58: Gradient Correlated (gCOSY) spectrum of 1.5 Di-Feruloylquinicacid

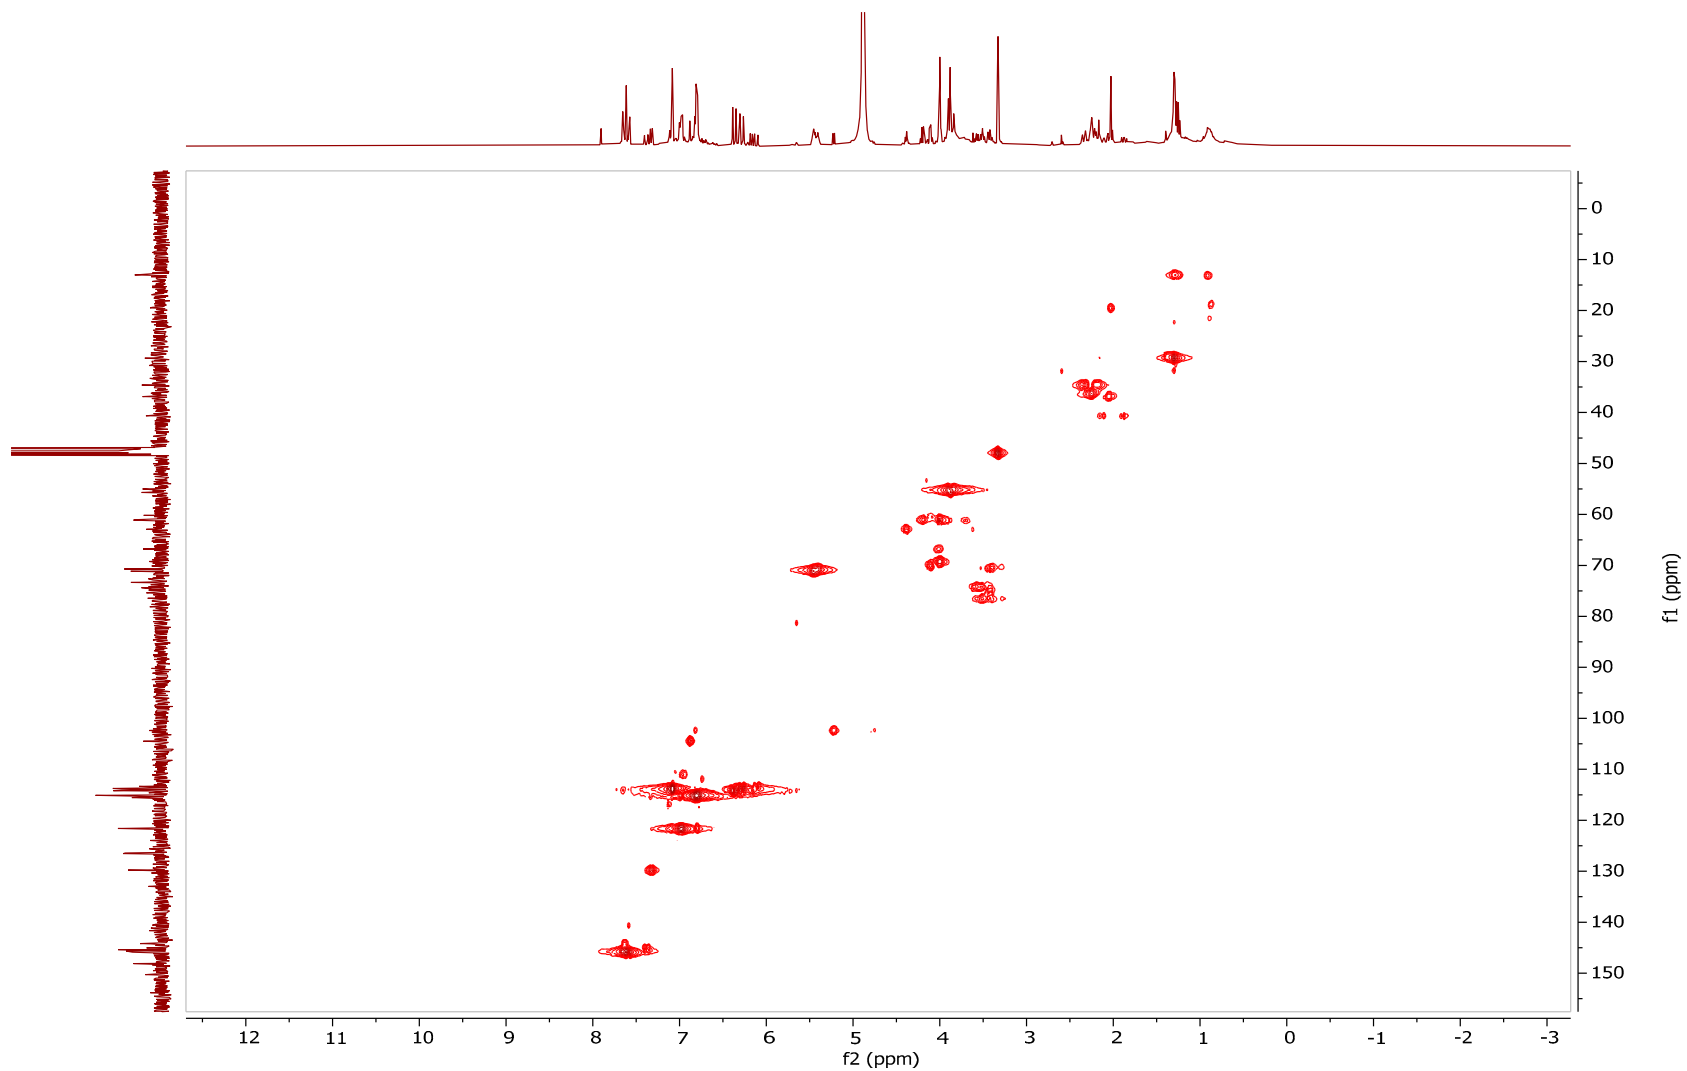

Figure SG.59: Gradient Heteronuclear Single Quantum Coherence (gHSQC) spectrum of 1.5 Di-Feruloylquinic acid

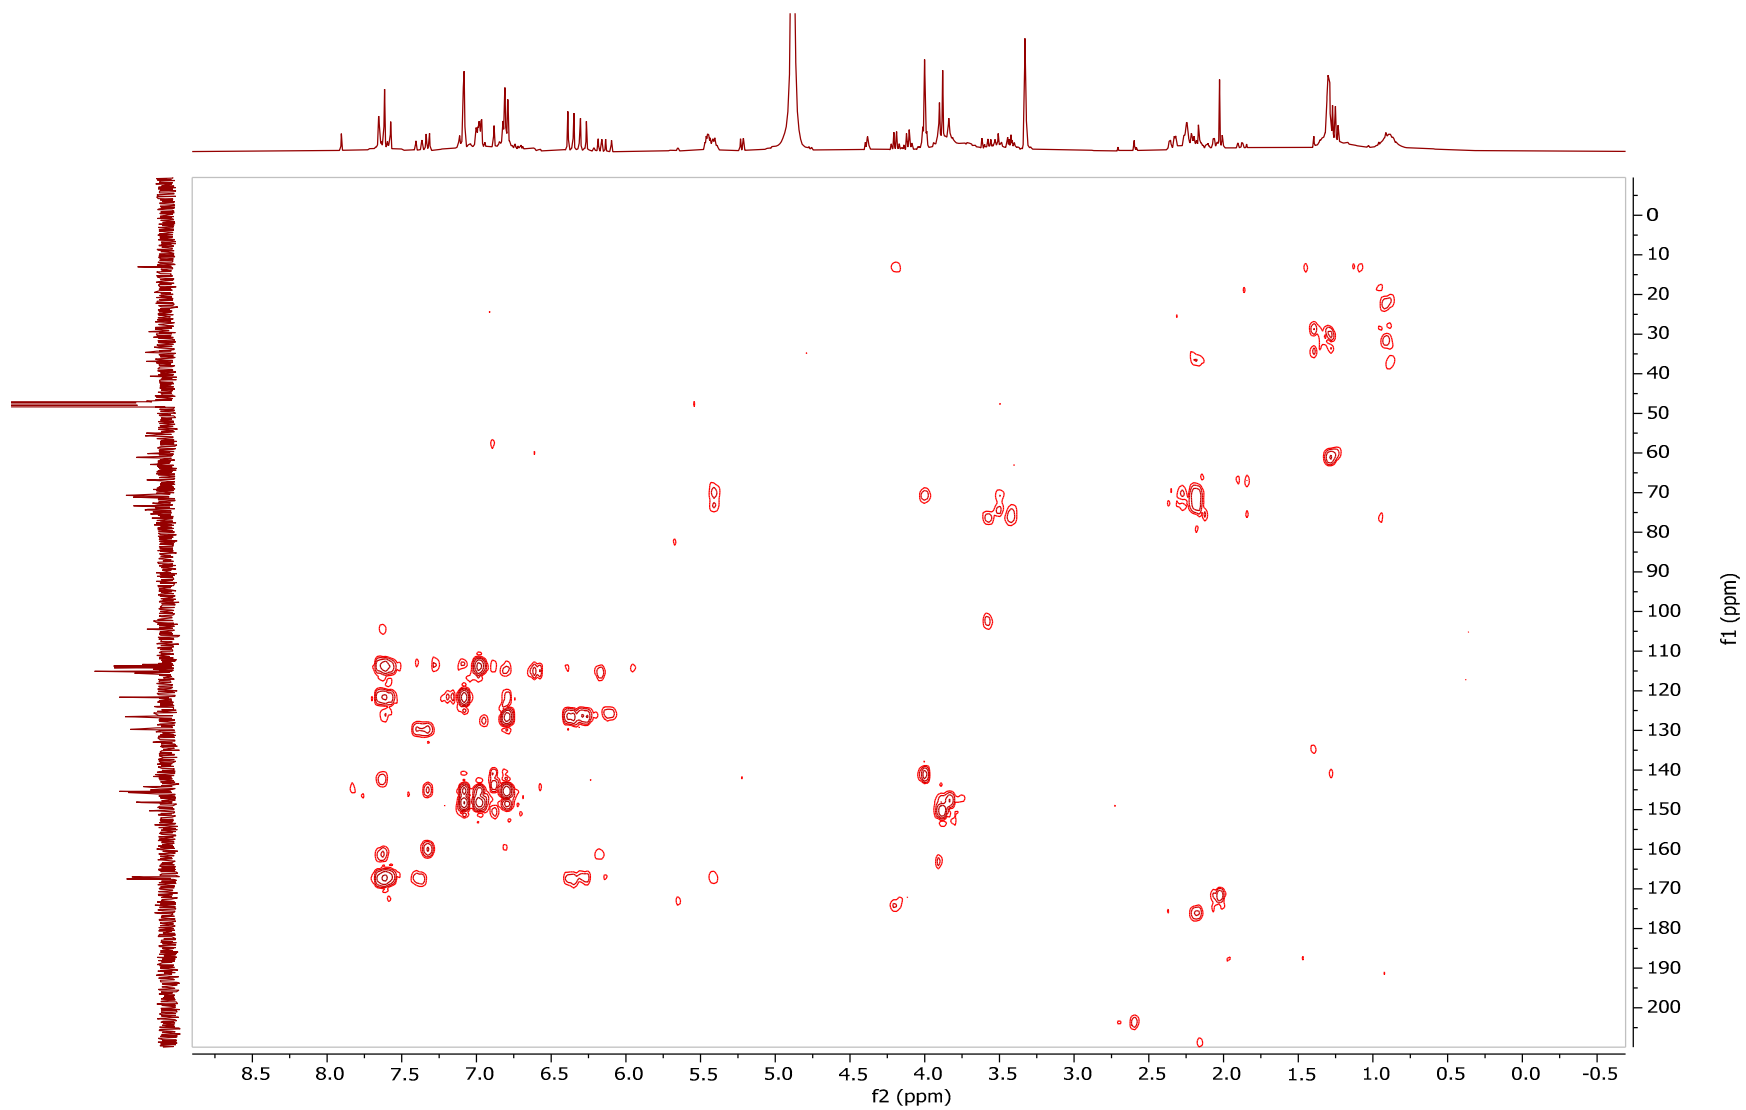

Figure SG.60: Gradient Heteronuclear Multiple Bond Quantum Coherence (gHMBC) spectrum of 1.5 Di-Feruloylquinic acid

8. Spectral data of Compound H

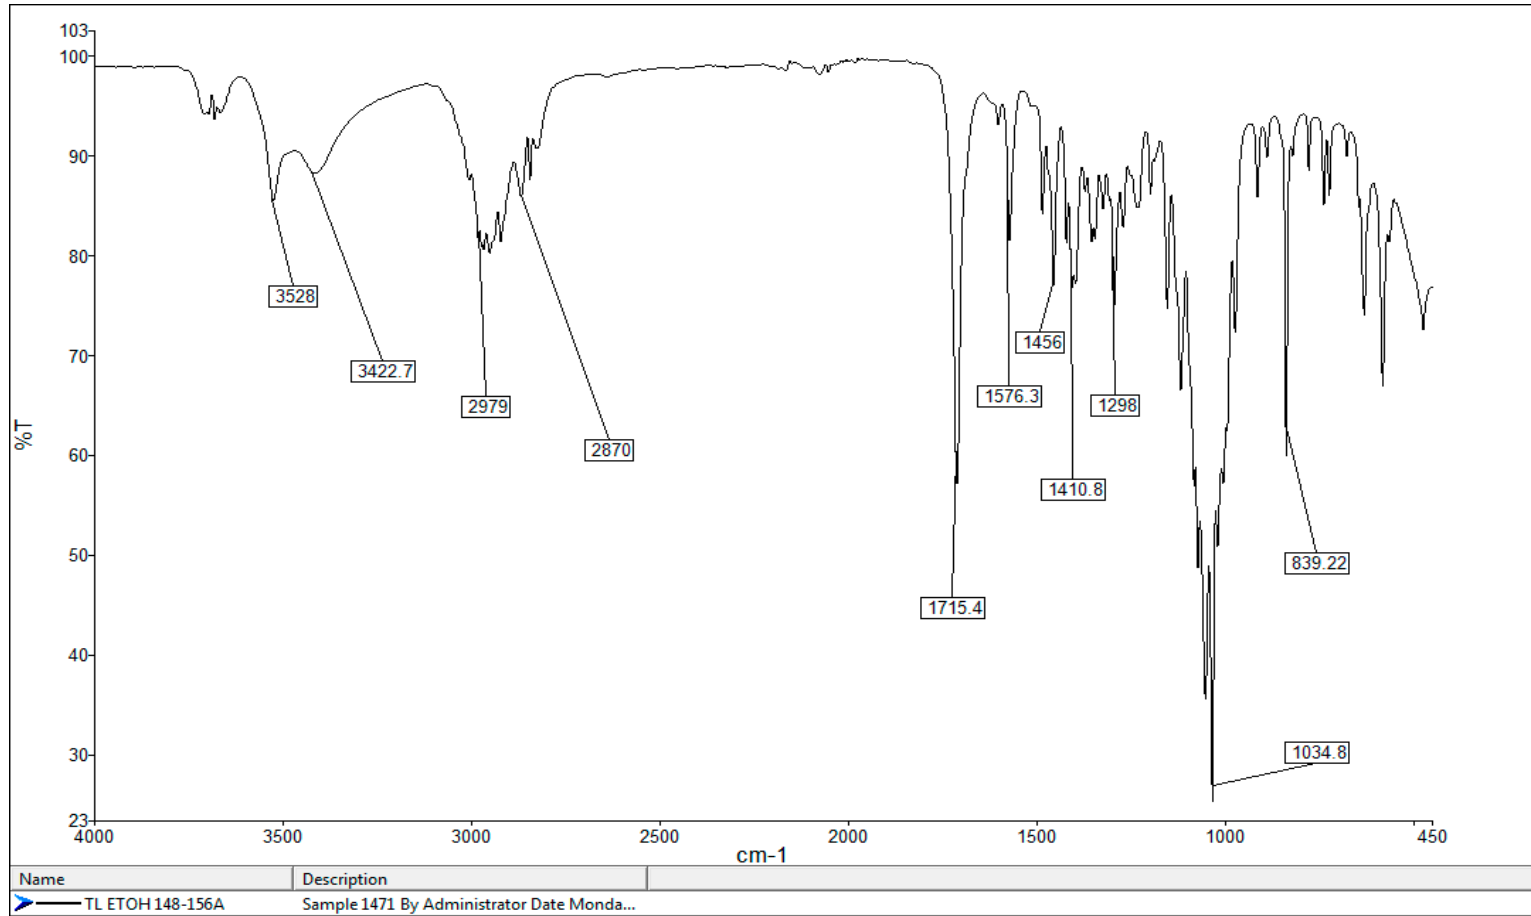

Figure SH.61: Fourier-Transform Infrared Spectroscopy (FTIR) spectrum of - Isofraxidin-7-O-β-D-glucopyranoside

TL 148-156

JT\_TUT\_220317\_23A 13 (0.103) Cm (13)

1: TOF MS AP+  
1.41e5

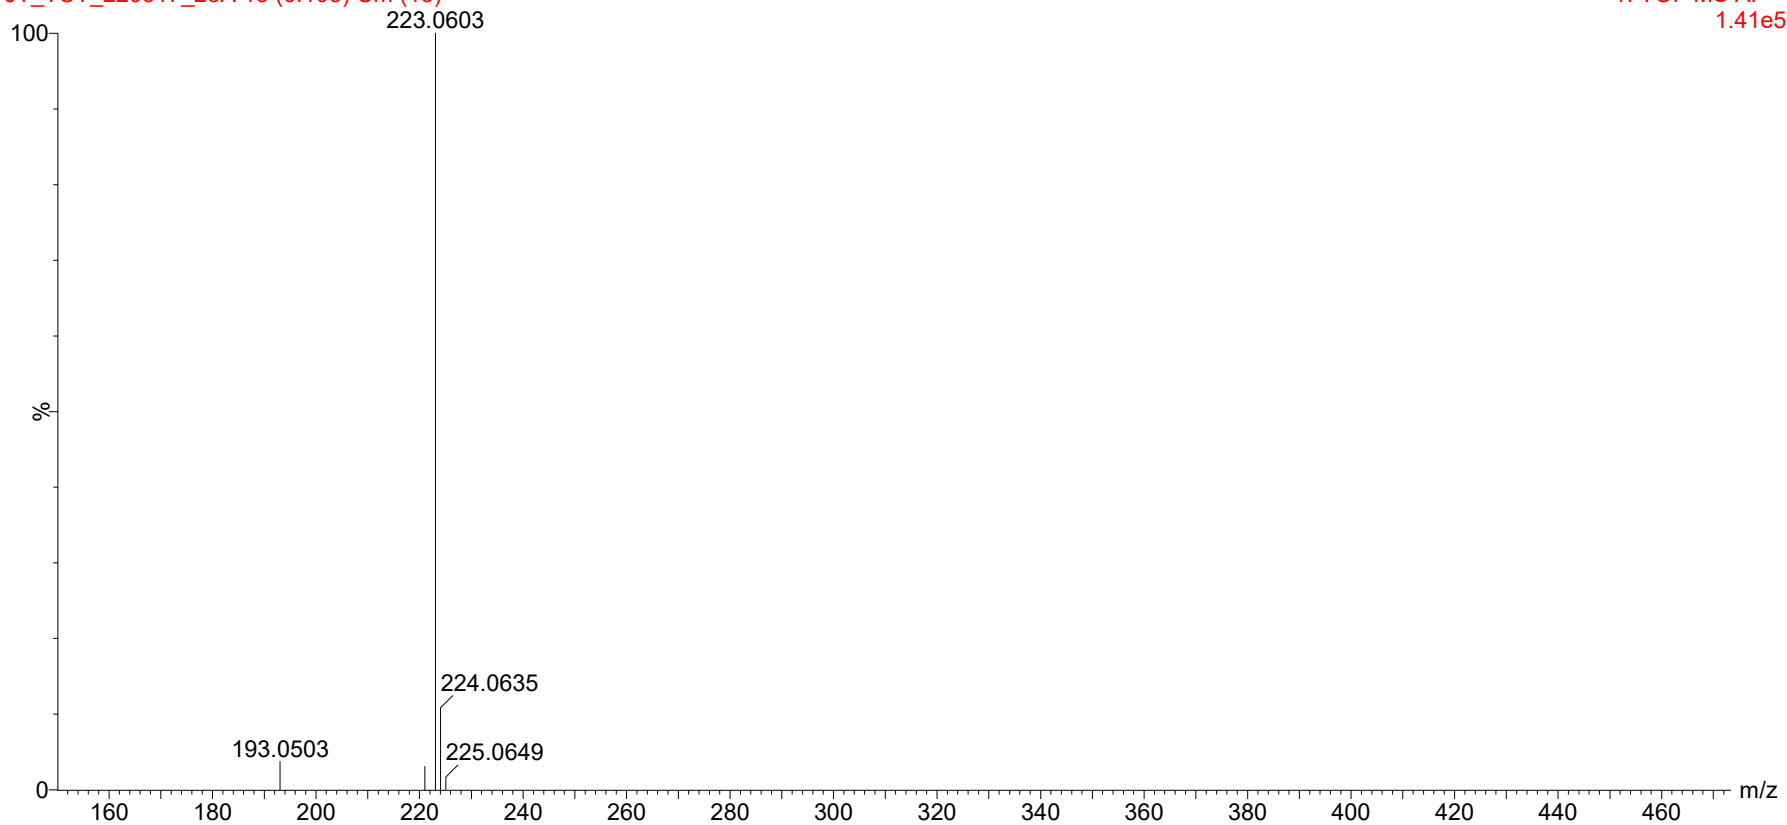

Figure SH.62: High-Resolution Electrospray Ionization Mass spectrum (HR-ESI-MS) of Isofraxidin-7-O- $\beta$ -D-glucopyranoside [M-C<sub>6</sub>H<sub>12</sub>O<sub>6</sub>] m/z = 223.0603

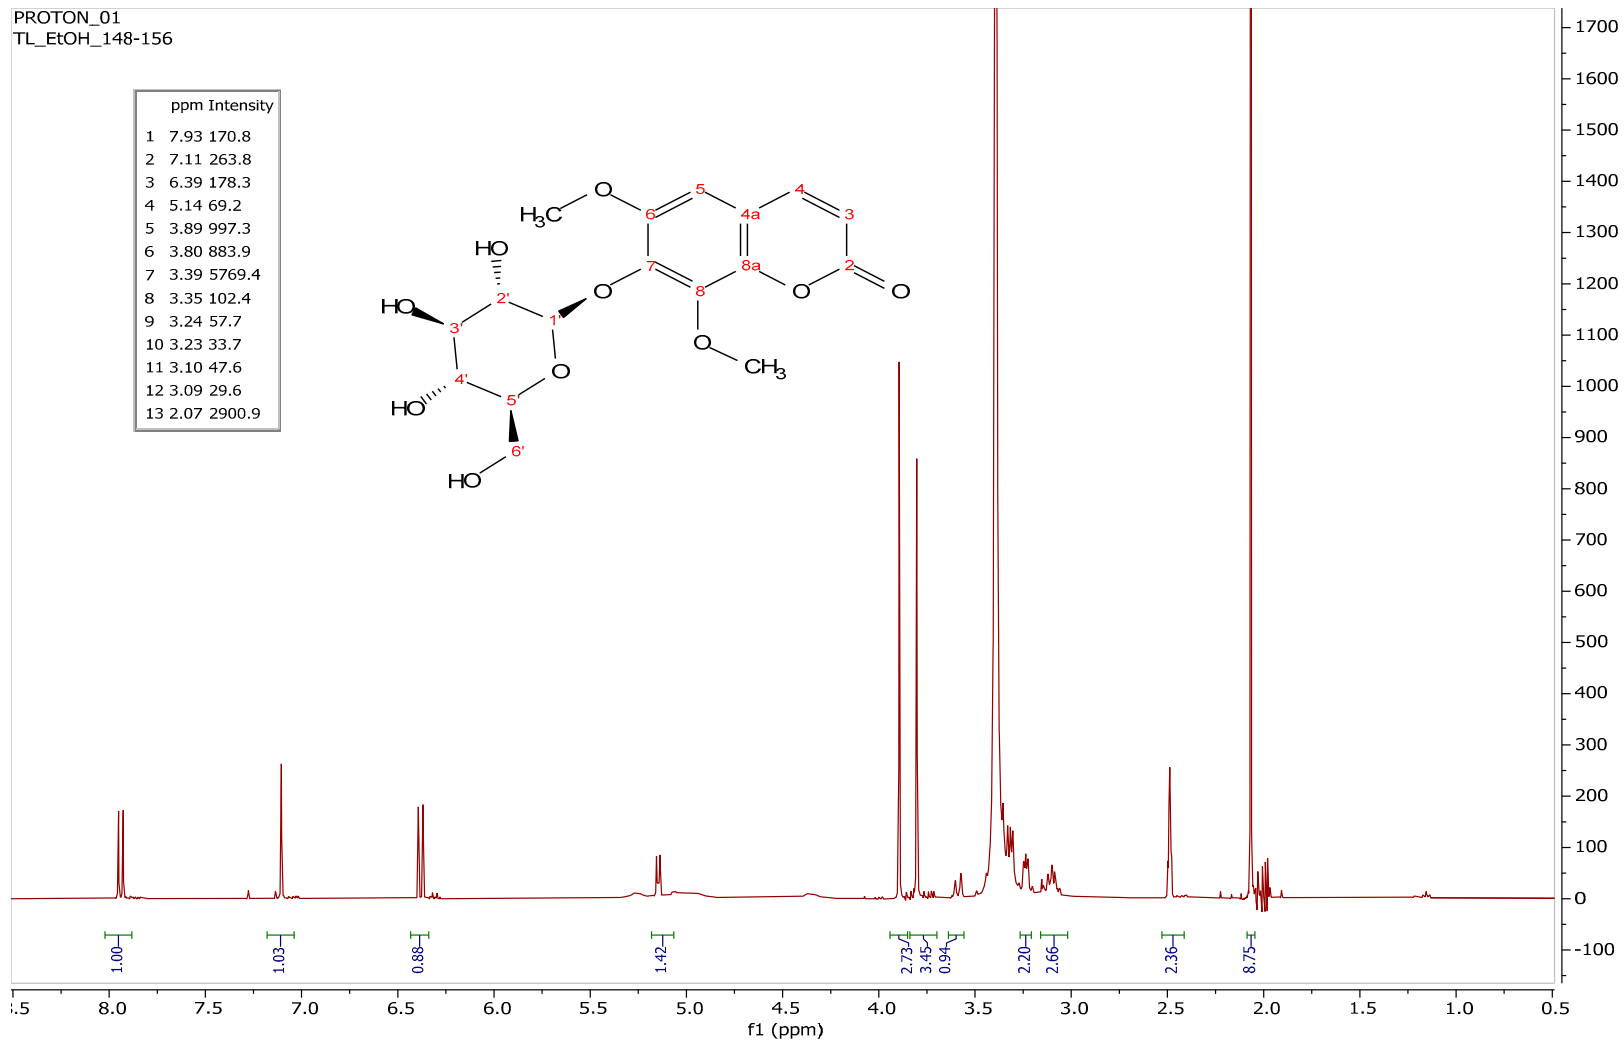

Figure SH.63: Proton Nuclear Magnetic Resonance (<sup>1</sup>H NMR) spectrum of Isofraxidin-7-O-β-D-glucopyranoside (DMSO, 400 MHz)



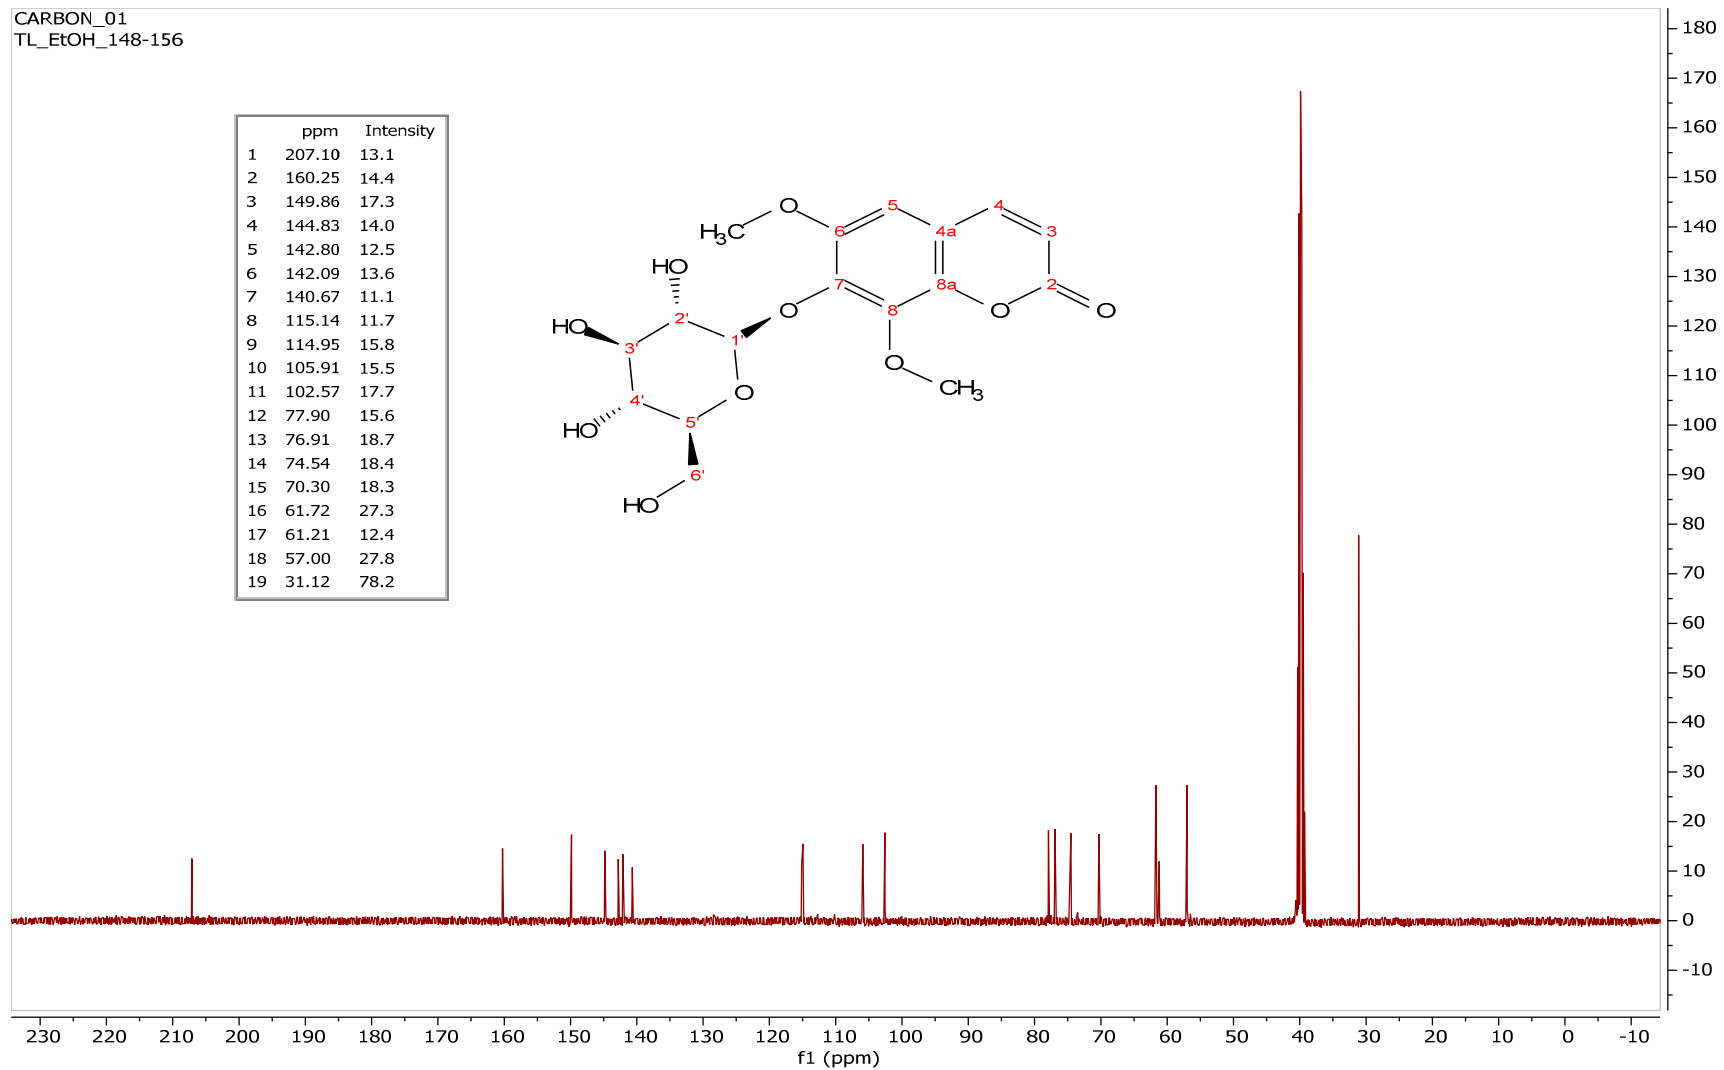

Figure SH.64: Carbon-13 Nuclear Magnetic Resonance ( $^{13}\text{C}$  NMR) spectrum of Isofraxidin-7-O- $\beta$ -D-glucopyranoside (DMSO, 100 MHz)

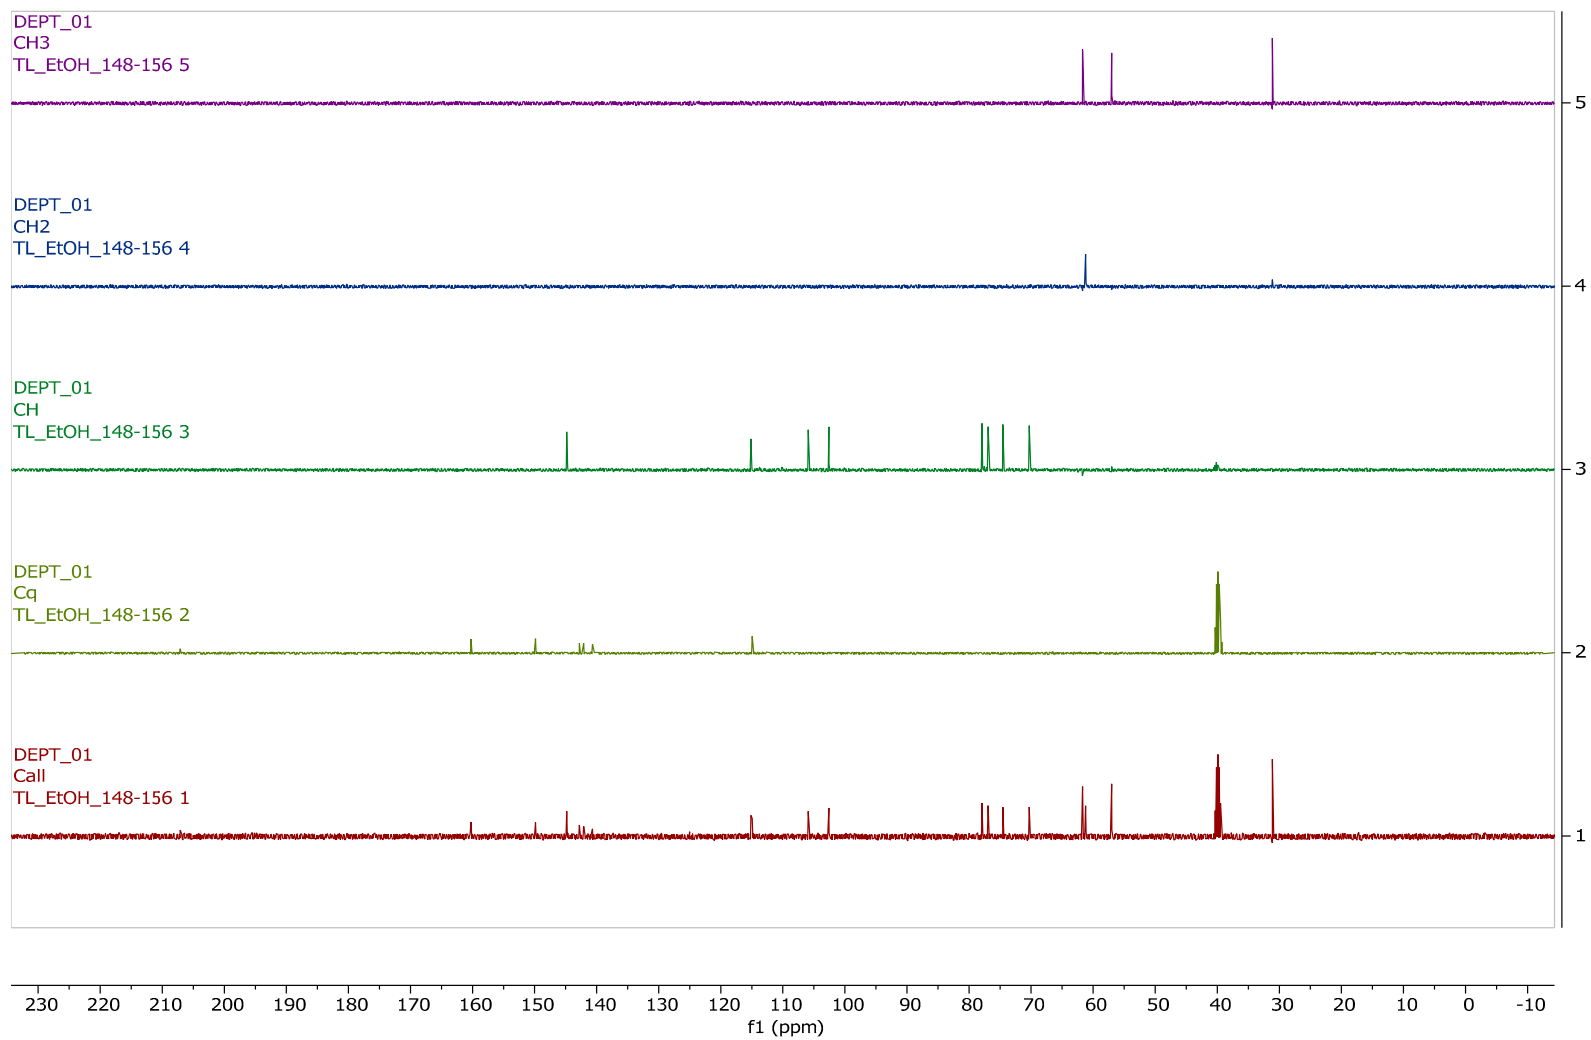

Figure SH.65: Distortionless Enhancement by Polarization Transfer (DEPT) NMR spectra Isofraxidin-7-O-β-D-glucopyranoside (DMSO, 100 MHz)

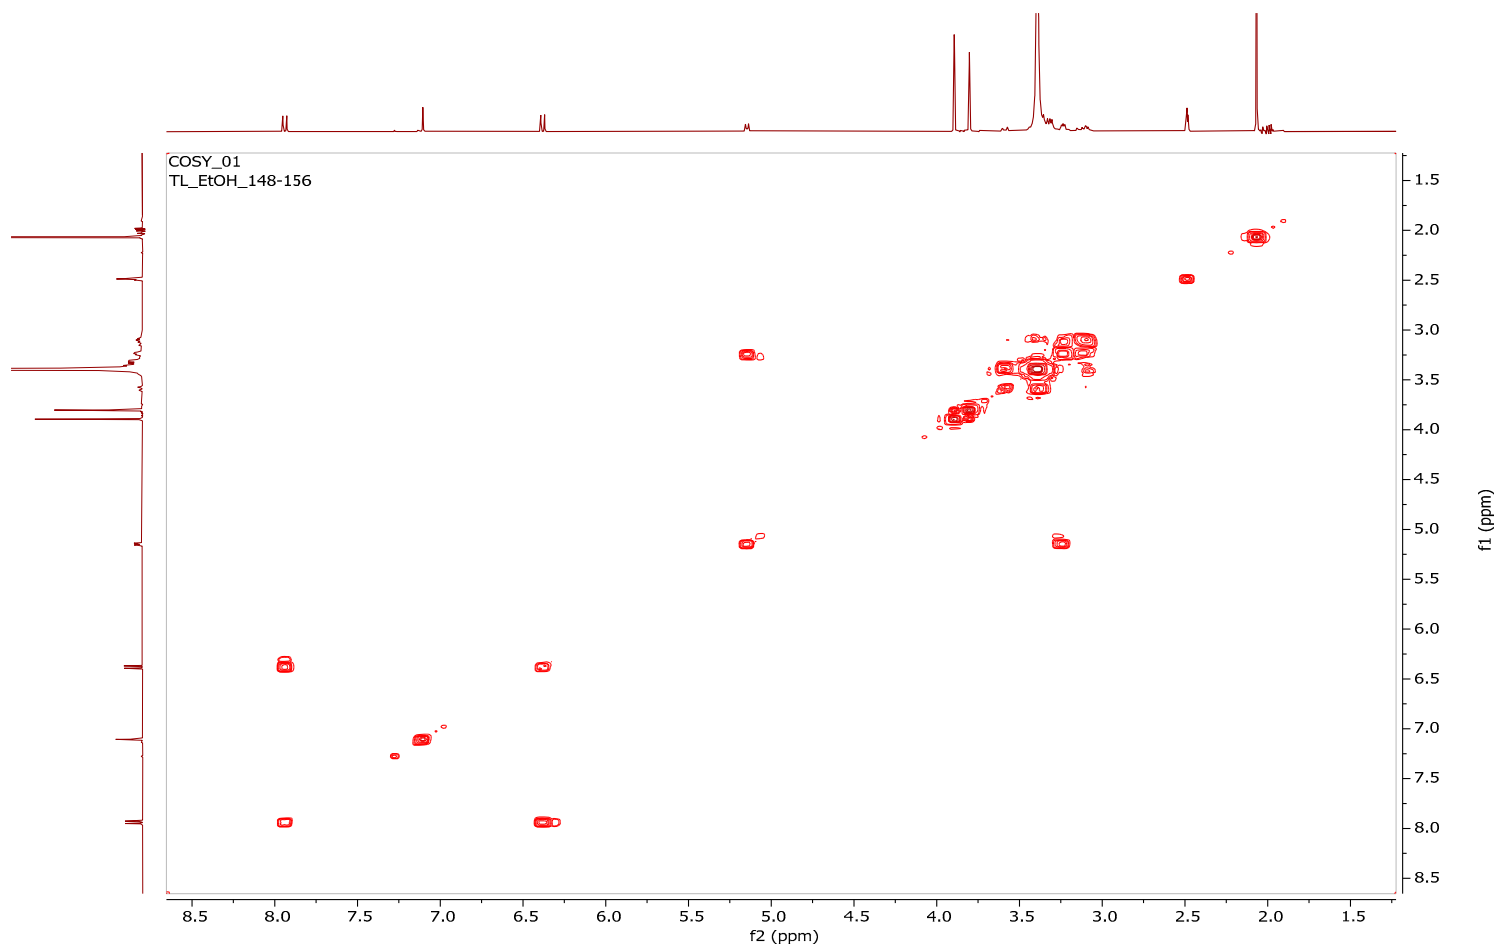

Figure SH.66: Gradient Correlated (gCOSY) spectrum of Isofraxidin-7-O- $\beta$ -D-glucopyranoside

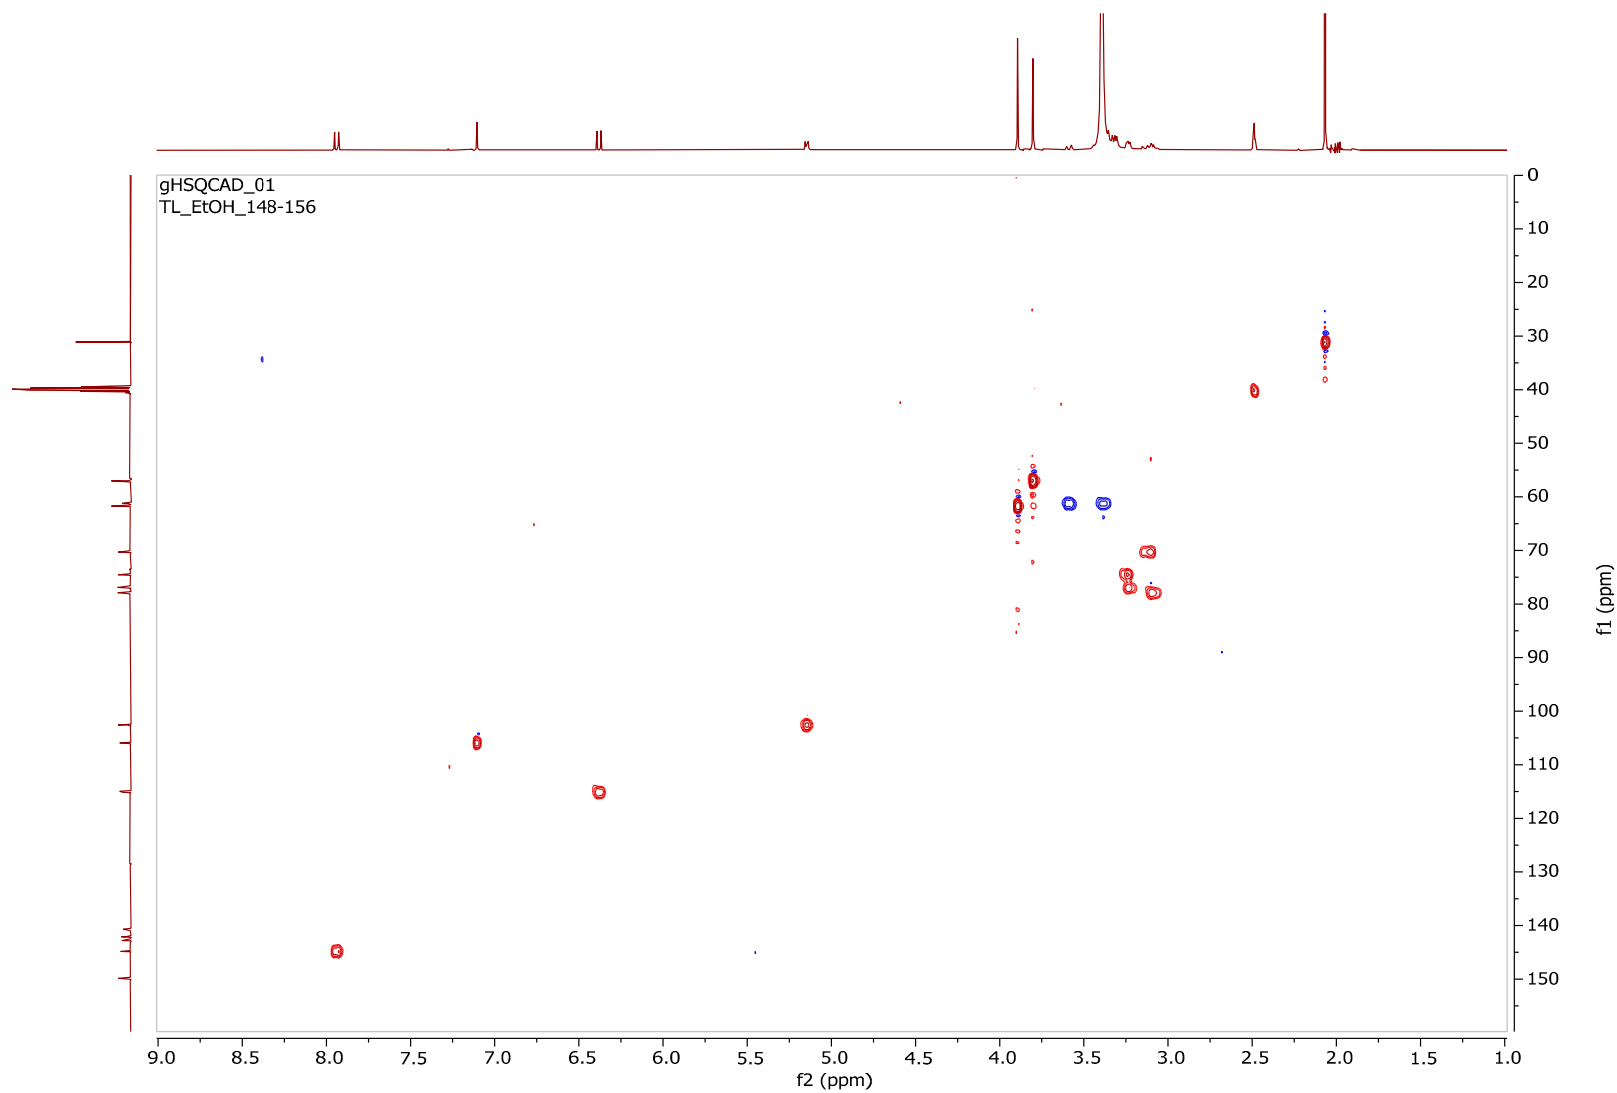

Figure SH.67: Gradient Heteronuclear Single Quantum Coherence (gHSQC) spectrum of Isofraxidin-7-O- $\beta$ -D-glucopyranoside

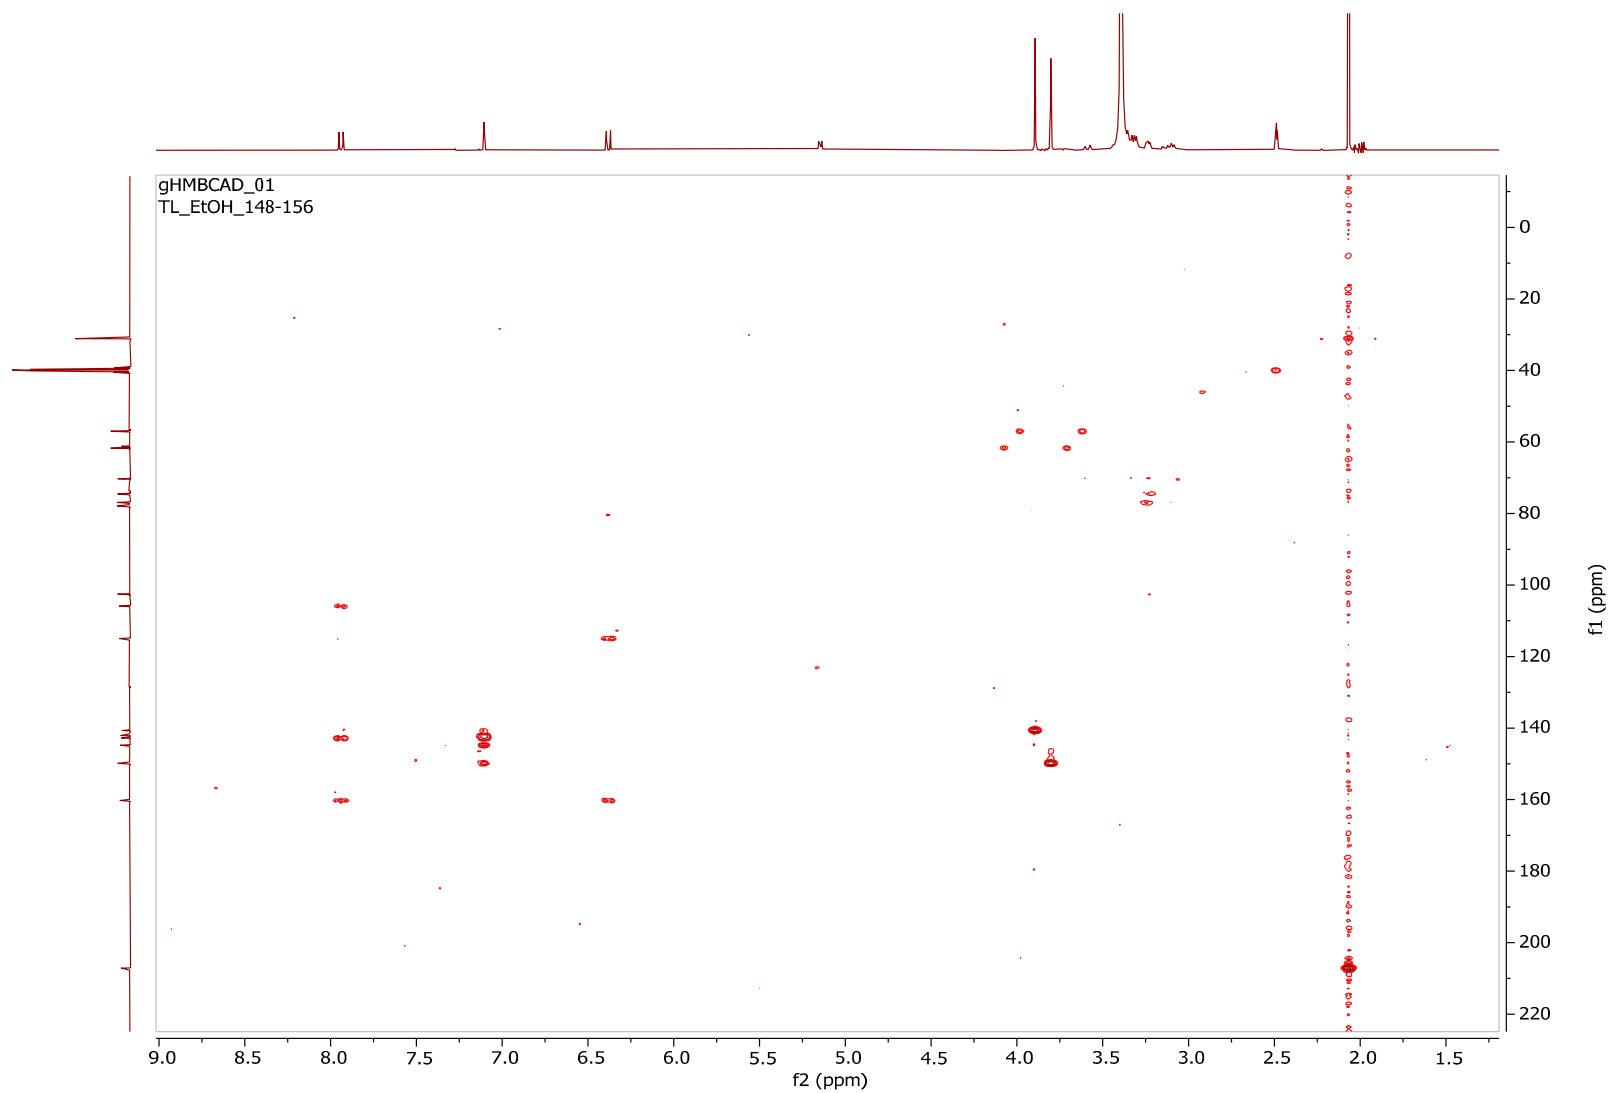

Figure SH.68: Gradient Heteronuclear Multiple Bond Quantum Coherence (gHMBC) spectrum of Isofraxidin-7-O- $\beta$ -D-glucopyranoside
